# Supplementary material
Source: Elsevier journal article supplement (https://eprints.lib.hokudai.ac.jp/dspace/bitstream/2115/57666/3/mmc2.xlsx)
Supplement: mmc2 [file mmc2.xlsx]

## Sheet: Sheet1
Table S1. Colpomenia bullosa flagellar proteome (CbFP) identified by LC-MS/MS Information of identified proteins obtained by Mascot analysis includes "gi Number", "Accession Number", "Coverge", number of "PSMs" ( petptide-spectrum matches), number of "Peptides", "AAs" (number of amino acid residues), "MW [kDa]" (predicted molecular weight, "Calc. pI" (calculated pI value). Information after searc…
gi Number	Accession Number	Coverge (%)	PSMs	Peptides	AAs	MW[kDa]	Calc.pI	Description	GO annotation	E-value	Mean Similarity	Transmembrane Protein	Transmembrane Helices																								Peptide Sequences
gi298711487	CBJ26575.1	31.07	129	118	4410	498.8	5.43	dynein heavy chain	dynein heavy chain	0	0.6505																										EMQSDTEVQmLVAILNDALSDNDEAcMR LANAPDDILSDVPLIEGLEATK EmQSDTEVQMLVAILNDALSDNDEAcMR EMQSDTEVQMLVAILNDALSDNDEAcMR LANAPDDILSDVPLIEGLEATK LYLSSDPSNAIPIGVLSR ALALPcYVFNcSDQMNYQTMADIFR KIPLTPGVDPLDLLTNDGNNAK GYVDFVNNVVVDGLSR IMPYLGDcYDSLANLTFITLEDGTTSSK LNDGIDTAVNWEVEKPR DSAVcLTNYMENSGGGK AAGIPDTPEAGLEFLISR KAATEVLLEEMGVQR ESLAVHMAEEHLSVTK FVTLYELSSDLLSK AAGIPDTPEAGLEFLISR IPIEVLSVVATQVK WPLIIDPQQQGIK V…
gi298708134	CBJ30475.1	29.99	128	113	4641	526.9	5.97	dynein heavy chain	dynein heavy chain	0	0.6915																										AQEMYGEVDPATGEWNTGVFAAMWAK VQMMWcSLESVFTGGDIAK YLSGLVGEVFGEELMDK QNAYNTWIIADGPVDAIWIEDLNTVLDDNK LNIIFQNYGMELEQVQQLYEK HVTPFREEAQNELQVLSDTSDTLER TLLVDLPDDQSFTVQEFVDMQR FIEPLYSGTATTIIDTLPALMNSIK LTSNTGNLLEDEELIGVLANTK FFSNLPNDMAGNESMWR TDIDDFLTVLPLLQELSK ALIILGVEQDIDPMLDPVMEK WALDDVVYHTEVTSYER ALEEQLSDVLEEVNSNTK ALIILGVEQDIDPMLDPVMEK LTSNTGNLLEDEELIGVLANTK INEETIEFLVPYLEIEGFNPQVAK FIEPLYSGTATTIIDTL…
gi298708958	CBJ30911.1	26.72	97	85	3915	437.3	5.07	Dynein heavy chain family dynein heavy chain	dynein heavy chain	0	0.68																										FQNIGDAMQSDSDDWQAWFDDEKADQAK GQLNMSQSMEDLATAFGLNEWPGR YYFVSEADLLDILSNGSDPNK MKELEDNILYK VWDVcEELQTFIQDSK KVDEELEHFVVK ETVFDYWLDPETGSFEQWTK GLASSGAWGcFDEFNR DFLNTIPLISLLGNK FINISMGQGQEKPAEGVVER ETVFDYWLDPETGSFEQWTK AGILYISTDDGTQWVSLIQSWLK AEIAIADATLPYDYEYLGNGPR AGNKDEGLMFLLTDSQITNER DQLMGQEFLPFLQK WPLIIDPQLQGIK AVPVQSSWEPSAVGYIR DGGWVLLQNcHLMQSWVPSLER AVPVQSSWEPSAVGYIR IYEAPVYITSFR MIADMESNcK DFLN…
gi298708645	CBJ26132.1	28.89	41	31	1522	167.9	5.92	PAS/PAC sensor hybrid histidine kinase putative blue light receptor	pas pac sensor protein	0	0.688																										GTQQLWDFANSSQGETLEPGVAMQK TGSNPNEVAALEGAINTSESK VYTQFVAAQGSGIGAQDR AQQSLYFLAQDMFPR SMLMDQAGFmAFDGFLK VQEEAETTLGMLAFDAFPR FQNLLSMKPVFDADDIYR YQIGcQVDYDPNNPETPMFIMELER FLQGPETEPESIAVIR TKGTQQLWDFANSSQGETLEPGVAMQK FQNLLSMKPVFDGDNIYR FLQGPETEPESIAVIR VQEEAETTLGMLAFDAFPR TTGEANTMISAK SLWMQDAAASLK AQQSLYFLAQDMFPR YcQAVMDDLK TTGYTKEEAVGR TLNMLAFDAFPR NILKNEVAQVK QcGSQLSQTHLR FQNLLSMKPVFDGDNIYR IMWLSNPTK…
gi298707275	CBJ25902.1	9.47	36	31	4613	521	5.38	Dynein-1-alpha heavy chain	dynein heavy chain	0	0.6985																										FISLGQGQGPLAEQMMEQGYQK ELSSSQGNILDNEELIQTLENTK AIADEALmEALPAVEAAAAALENLDKK AVTGESAGIDEIMDRVEGLALPLNK FTADIDDIVNESVQELK ILAQSSPVMPMVFVLSPGADPQSDIQSLGEQR AFESGDELLPWGSLK GNAMLVGVGGSGK VcGDLLEVATVLDQLHK YHDIASNVEPLR ATGPGNSNTELEDGVR AIADEALMEALPAVEAAAAALENLDKK MVPLMELIAGEIAGK TPVYVTQER LGGAPAGPAGTGK APMDVAEFYDSLETKR ESINQSIDER FVFEDVPLFK VMDEVEAPMLPTFNYHFSELSR LITGLTGER VPFDIFDR TLVVFVDDMNMPK LVITPL…
gi298707748	CBJ26065.1	73.15	360	28	447	50	4.89	beta tubulin	beta-tubulin	0	0.9705																										EAEScDALQGFQLTHSMGGGTGAGMGTLLISK AGPFGQLFRPDNFVFGQTGAGNNWAK KEAEScDALQGFQLTHSMGGGTGAGMGTLLISK GHYTEGAELIDSVLDVVR FWEVISDEHGIDPTGAYHGDSDLQLER EAEScDALQGFQLTHSMGGGTGAGmGTLLISK EAEScDALQGFQLTHSMGGGTGAGMGTLLISK EAEScDALQGFQLTHSMGGGTGAGMGTLLISK FWEVISDEHGIDPTGAYHGDSDLQLER FWEVISDEHGIDPTGAYHGDSDLQLER EAEScDALQGFQLTHSmGGGTGAGMGTLLISK AGPFGQLFRPDNFVFGQTGAGNNWAK KEAEScDALQGFQLTHSMGGGTGAGMGTLLISK FWEVISDEH…
gi298708739	CBJ30701.1	67.11	328	27	447	50	4.89	beta tubulin	beta-tubulin	0	0.971																										EAEScDALQGFQLTHSMGGGTGAGMGTLLISK AGPFGQLFRPDNFVFGQTGAGNNWAK KEAEScDALQGFQLTHSMGGGTGAGMGTLLISK GHYTEGAELIDSVLDVVR EAEScDALQGFQLTHSMGGGTGAGmGTLLISK EAEScDALQGFQLTHSMGGGTGAGMGTLLISK EAEScDALQGFQLTHSMGGGTGAGMGTLLISK EAEScDALQGFQLTHSmGGGTGAGMGTLLISK AGPFGQLFRPDNFVFGQTGAGNNWAK KEAEScDALQGFQLTHSMGGGTGAGMGTLLISK EAEScDALQGFQLTHSMGGGTGAGMGTLLISK VSDTVVEPYNATLSVHQLVENADQcFTLDNEALYDIcFR EAEScDALQGFQLTHSMGGG…
gi299471584	CBN79446.1	74.05	280	27	447	50.1	4.89	beta tubulin	beta-tubulin	0	0.9695																										AGPFGQLFRPDNFVFGQTGAGNNWAK EAEScDALQGFQLTHSMGGGTGAGMGTLLISK EAEScDALQGFQLTHSMGGGTGAGMGTLLISK AGPFGQLFRPDNFVFGQTGAGNNWAK KEAEScDALQGFQLTHSMGGGTGAGMGTLLISK EAEScDALQGFQLTHSMGGGTGAGmGTLLISK EAEScDALQGFQLTHSmGGGTGAGMGTLLISK GHYTEGAELIDSVLDVVR VSDTVVEPYNATLSVHQLVENADQcFTLDNEALYDIcFR EAEScDALQGFQLTHSMGGGTGAGmGTLLISK MSTTFVGNTTAIQEVWK mSTTFVGNTTAIQEVWK EIVHVQAGQcGNQIGSK MSTTFVGNTTAIQEVWK EAEScDALQGFQLTH…
gi298707747	CBJ26064.1	67.72	385	26	474	52.8	4.88	beta tubulin	beta-tubulin	0	0.971																										EAEScDALQGFQMTHSMGGGTGAGMGTLLISK AGPFGQLFRPDNFVFGQTGAGNNWAK GHYTEGAELIDSVLDVVR EAEScDALQGFQMTHSMGGGTGAGMGTLLISK FWEVISDEHGIDPTGAYHGDSDLQLER FWEVISDEHGIDPTGAYHGDSDLQLER KEAEScDALQGFQMTHSMGGGTGAGMGTLLISK FWEVISDEHGIDPTGAYHGDSDLQLER KEAEScDALQGFQMTHSMGGGTGAGMGTLLISK AGPFGQLFRPDNFVFGQTGAGNNWAK EAEScDALQGFQMTHSMGGGTGAGmGTLLISK FWEVISDEHGIDPTGAYHGDSDLQLER EAEScDALQGFQMTHSMGGGTGAGMGTLLISK EAEScDALQGFQMT…
gi299470798	CBN79844.1	8.66	33	25	4207	474.4	5.25	dynein heavy chain	dynein heavy chain	0	0.6955																										IISTQEQVGGLQEQLTAMEPVLIK LAMQNQGLQPVPIFLTK EQVDEFLPFLPVITGLR EQVDEFLPFLPVITGLR DLDEALPALDVAVAcLK AETGEFLFDDLR VEQVSSMVR ASFENPSLEPK GLSLGQGQGLK ILFLLSNSK TIFGNFLER LIEEASQK KINDWFGAAKK KINDWFGAAKK WDSEVASLNDSRPK VAALEAQFDEANTKK KINDWFGAAKK VQAPFETRPGEIPR KINDWFGAAKK VSETASKEFAIESALDK KINDWFGAAKK FLAYVNFMTQDTLR KINDWFGAAKK AIADDAQR KINDWFGAAKK SRDFcFSSFLTKPEIIK QPmHLVmFGDAIEHVSRISRVIR LLQDmQEFDK K…
gi298706906	CBJ29733.1	6.09	27	25	4822	535	6.02	dynein heavy chain	dynein heavy chain	0	0.6235																										VLTLVSNER QFHYDWGLR FVDFFR LVITPLTDR TELPENLK DGVLAIImR NATPATVSR AKmEPLVPIPTINMVQAVcR GLETPLSAEDKDGImSTMTHIR GLETPLSAEDKDGIMSTmTHIR DSLMQFFVER AGGLELDK QLEQPLDKRSGK WLPDLTAKmIPLR GAASWVAR VVQFQELLDVRHSVMVLGPAGcGK GAASWVARATLR DGIMSTmTHIRDVR NDLVQASNRYK SLVVLQMGEANWmK DGIMSTmTHIRDVR KNFSWENAK TKNDLVQASNR DYRQELWRNR GLETPLSAEDKDGIMSTmTHIR DGIMSTmTHIRDVR AFEDMMQEAAKK EEFDAIFTAIR QLEQPLDK
gi299472977	CBN77378.1	57.02	187	23	453	50	5.06	alpha tubulin	alpha tubulin 1	0	0.9665																										AVcMVANTTAIAEALSR AVcMVANTTAIAEALSR AVcMVANTTAIAEALSR AVcMVANTTAIAEALSR IHFMLTSYAPIISAEK AVcMVANTTAIAEALSR IHFMLTSYAPIISAEK AVcMVANTTAIAEALSR AVcMVANTTAIAEALSR AYHEQLSVAEITNSVFEPAGMMTK AVcmVANTTAIAEALSR AVcMVANTTAIAEALSR AVcMVANTTAIAEALSR AVcMVANTTAIAEALSR AYHEQLSVAEITNSVFEPAGMMTK AVcMVANTTAIAEALSR AVcMVANTTAIAEALSR AVcMVANTTAIAEALSR AYHEQLSVAEITNSVFEPAGMMTK AYHEQLSVAEITNSVFEPAGMMTK AYHEQLSVAEITN…
gi298713793	CBJ27165.1	6.98	24	23	4142	466.4	5.36	dynein heavy chain	dynein heavy chain axonemal	0	0.656																										NSEGNILDDEVLISTLAQSK FYYVTPTSYLELINTFK TIENAIQFGSPILLENVPESLDPVLEPVLLK AcYEDSTcSTPLIFVLTPGADPMTELLR TIENAIQFGSPILLENVPESLDPVLEPVLLK VLQLcSEQLSSQK FTVEDLPLFK SHYTFNLR HWETLSEK LVITPLTDR QVVTVGGISSIR LYSFGFEDAR HYDYGMR RLYFPRFFFLSNDELLEILSQTK ISMDQLR AELPDNLK GLFIEGAR AEEALELDKVRMMDK KMLFGLTFFHATVR GMEGAVQLAAK EIEDTILDLLK KLcLMSGEIVK KLcLMSGEIVK DNmDSAmVEKVK AEEALELDKVRmMDK KMLFGLTFFHATVR AmKKPPAAV…
gi298710794	CBJ32211.1	6.75	27	22	4740	530	5.71	axonemal 1-beta dynein heavy chain dynein heavy chain	heavy chain 2	0	0.7005																										MSNVALGQGQAPAAIR LLSESTGSLLDDMNLVNTLQDSK DLENSITNYNESVLTVHQDASTFLPYGGDVKPEEAFK FMASLVEMSNQAK LGNPHYTPEVSTK FVQDAADDQGR GGNPLGPAGTGK AVLNMAGALK FIQDIPMEDESR YLIAEANYGGR LVVTPLTDR AVLNMAGALKRADPNMNEEAILMR TELPDNLK IKEGSVEANNNLKFLESITTPcQNLTmAKPK IKEGSVEANNNLKFLESITTPcQNLTmAKPK IHQGMTK GNLMLVGVGGSGR YIWENDKDGFIR TFNKDNVSNALmTK TFNKDNVSNALmTK TFNKDNVSNALmTK TFNKDNVSNALmTK EQVETmSVELEAK SILASRSDPDPmKT…
gi298711589	CBJ32648.1	6.95	31	22	3582	394.5	5.38	viral A-type inclusion protein	viral a-type inclusion protein	0	1																										DMAEREEAVQR HLEEMERQAR NAAANLDAENKAAR DASRTALLQDIDRLETQR LKAEAVLERSR LAAEGLEK DASRTALLQDIDRLETQR IEPAAPMVQEAPETPVARMEQSAQPTTPAGRR DWEESLK DASRTALLQDIDRLETQR EKAALEEGER EAQRLSRAEEEGK ERKLASWQAGLDK ESEVNDWRR DASRTALLQDIDRLETQR KNRAEmAR ELTAMLK GGDAEPPRPTRR REAAAEADKLEK LRRSAQEQR GGDAEPPRPTRR LQGGSRAGVDVETRER LSAIQEQLDK GGDAEPPRPTRR EASVSEAEGRVSAEAR GGDAEPPRPTRR GGDAEPPRPTRR GGDAEPPRPTRR mRSQLSEALSQ…
gi299471583	CBN79445.1	57.74	239	21	448	50.2	4.89	beta tubulin	beta-tubulin	0	0.965																										GHYTEGAELIDSVLDVVR VSDTVVEPYNATLSVHQLVENADQcFTLDNEALYDIcFR mSTTFVGNTTAIQEVWK VSDTVVEPYNATLSVHQLVENADQcFTLDNEALYDIcFR MSTTFVGNTTAIQEVWK MSTTFVGNTTAIQEVWK MSTTFVGNTTAIQEVWK MSTTFVGNTTAIQEVWK MSTTFVGNTTAIQEVWK MSTTFVGNTTAIQEVWK MSTTFVGNTTAIQEVWK MSTTFVGNTTAIQEVWK MSTTFVGNTTAIQEVWK EIVHVQAGQcGNQIGSK MSTTFVGNTTAIQEVWK GHYTEGAELIDSVLDVVR VSDTVVEPYNATLSVHQLVENADQcFTLDNEALYDIcFR MSTTFVGNTTAIQEVWK MSTTFVG…
gi298715658	CBJ28184.1	54.38	206	21	453	49.9	5.06	alpha tubulin	alpha tubulin 1	0	0.967																										AVcMVANTTAIAEALSR AVcMVANTTAIAEALSR AVcMVANTTAIAEALSR AVcMVANTTAIAEALSR IHFMLTSYAPIISAEK AVcMVANTTAIAEALSR IHFMLTSYAPIISAEK AVcMVANTTAIAEALSR AVcMVANTTAIAEALSR AYHEQLSVAEITNSVFEPAGMMTK AVcmVANTTAIAEALSR AVcMVANTTAIAEALSR AVcMVANTTAIAEALSR AVcMVANTTAIAEALSR AYHEQLSVAEITNSVFEPAGMMTK AVcMVANTTAIAEALSR AVcMVANTTAIAEALSR AVcMVANTTAIAEALSR AYHEQLSVAEITNSVFEPAGMMTK AYHEQLSVAEITNSVFEPAGMMTK AYHEQLSVAEITN…
gi298707471	CBJ30094.1	7.41	32	21	4189	465.7	5.44	dynein heavy chain	dynein heavy chain axonemal	0	0.6295																										YGAPVLLENVKEELDPGLEPVLLK NAQVVEQMYALLAQYDVK MYVEEQDDVPWDTLNVIVADVTYGGR LGGAPAGPAGTGK QcVQAGTEGSDNRK TNEMFLTELLKPR TELPDNLK VLAQmSADDVK LFDEMPcIWLKPSR QNLDIFSLPAGAAAGGGGRGIRGLAGSR TYLADFQHANQLLEEIQK mIYAFMIAVGILRQAGKVSDQEWR ALAVYcVVFNcSDGLDYKImGR AQFIEYQNARR MIYAFmIAVGILRQAGKVSDQEWR DEPYFNIMVPTADTTR TYLADFQHANQLLEEIQK RMPDMVR MWKSVMLATNK FDRNEMLmAESIPSRLFDEMPcIWLKPSR MWKSVMLATNK FDRNEmLMAESIPSRLFD…
gi298715280	CBJ27929.1	20.51	21	19	1152	127.5	5.22	conserved unknown protein	function unknown protein	0	0.53																										VYVcDLAGTEPAGDIVFAK TFTVFGPDAVDIPEAWFK YFQNVVDTVR YFQNVVDTVR AWQSVDKEILDVLPK LWVSPYVINPK LAAAGGGGEGDSKLQEMLAAK ELQNQGMK TYLFcAIRPEVK INLSLTEMSQFFmK AVAASSPAER YHSYTFSTcNFAK EILDVLPKIKEAK AQEMLDERMKQFEEEK GHcIMTLEVERPHPDMAGMKQK DLMSPVISEQHYK RLESAVK EILDVLPKIKEAK LAYEmFKDK AIAPTQFNHQSTR DMmDVETEEDLVGKPWTYR DmMDVETEEDLVGKPWTYR MMQQQREEYGR VEELEAEVcR LAYEmFKDK
gi299116066	CBN74482.1	37.32	30	18	435	48	5.27	conserved unknown protein	creatine kinase s- mitochondrial precursor	0	0.649																										EVLcGAFEKFEGELAGK FYDLGTLSDEDRNmLLSSGFLFQIPK FYDLGTLSDEDRNMLLSSGFLFQIPK TTNLLWHAGAAK LGFLGTcPSNLGTGLR AMAAGEKDLAAVK VREVLcGAFEK TALcWVNEEDHcR FYDLGTLSDEDR VREVLcGAFEK EVLcGAFEKFEGELAGK FAQISEALK TALcWVNEEDHcR NVSGYALPAGTDDEDR LGFLGTcPSNLGTGLR FYDLGTLSDEDRNMLLSSGFLFQIPK AmAAGEKDLAAVK IISMEDGGNVK TTNLLWHAGAAK EVLcGAFEKFEGELAGK NVSGYALPAGTDDEDRKK FEGELAGK EVLcGAFEK TTNLLWHAGAAK AMAAGEKDLAAVK NVSGYAL…
gi298707517	CBJ30119.1	61.07	20	17	250	28.1	4.63	14-3-3-like protein	14-3-3-like protein	0	0.854																										AAFDDAIAELDTLSEESYK SKIETELTDIcDDILK IETELTDIcDDILK AAFDDAIAELDTLSEESYKDSTLImQLLR ASASDALDAYK KASASDALDAYK IIEAELIPNSTSEEGK YLAEFQSAEDR IIEAELIPNSTSEEGK KASASDALDAYK VISSIEGKDTVSDQLPLIR DDLVYMAK AAFDDAIAELDTLSEESYK DSTLIMQLLR SASDLANQDLPPTHPIR LAEQAER DTVSDQLPLIR SKIETELTDIcDDILK MKGDYHR NLLSVAYK ELSVEER VISSIEGK YLAEFQSAEDRK
gi299116069	CBN74485.1	6.81	18	17	4296	475.7	5.57	dynein heavy chain	dynein heavy chain	0	0.6565																										LADEAETTANR FLADDLPLFAAIVK DLVLGSVAEAAR WLESLENLGK LVITPLTDR VEALEAQcAATVGEKK GDLTKLEPVLEQASKDAEK TAEWDYAcPVYKTAERK DLLFRVIFmR ETYMANNEHMTRVKQAYTNSSLEEFHK AQQMEVGVTK TSLHGFmKAGLLDYDTK mYTSFmNNQVPALWTRVSFASLKSLASWNK MLAAVMTDLRNKGSVNPEFQVVK GWQNcALPTDKVSTDSAILVAKGTR GYGLmEFREDIK LmEYQTLLAQPVDEIDTLDEVVSDLTLKK TSLHGFMKAGLLDYDTK DPQAVQPHLR KAIKGLVVMSQDLDR TELPDNLAVRVQK
gi298710506	CBJ25570.1	4.33	20	16	4205	468.4	5.67	dynein heavy chain	dynein heavy chain	0	0.6205																										GLASSGAWGcFDEFNR MGcAPAGPAGTGK SELPEGLK LVITPLTDR MIFEIR DLKYATPATVSR HVYTTPK YTYFKKESLEWQR IFKVIDFNSSKMK YATPATVSR AEPDLPEDSLLMRALRDFNTPK VSPKGRGPGR AVMLVGPAGTGKTQLVMGALR LPSRDTIFDYFLSVENGEcRFEPWTK LVPEVLSVcSLQFK VSPKGRGPGR EFKGAVDDGSVPEINIR IFKVIDFNSSK IFKVIDFNSSK SLLQFATKAK VSPKGRGPGR VSPKGRGPGR IFKVIDFNSSK
gi298706168	CBJ49096.1	5.19	16	15	3983	437.6	10.21	calmodulin-binding WW domain protein	calmodulin-binding ww domain protein	0	0.518																										RAWIRASAGDK ARKAEAEEQQR IVRGYIHR RVQTHFR TLYALDRILGVVEDSSEDTATTEAGAAKQQK ERVQKAEDDYLAAATAAAVVAEATPK ADNFSAALSEGGPGERAEVTAHQLR LRAcGRGLATR DAAAAEVSSR DTKHTGEVVSGGALPR QPGRSPPSEGRR VcGINSLLK GPDMVDMLQEESEVYPLYR cSEcHRRVGDR TGGGVASGAAGDAK YPVTRMQLTAWLKR LGLESTVDRRR
gi298706270	CBJ29295.1	25.28	15	14	658	72	5.07	Molecular chaperones HSP70/HSC70, HSP70 superfamily	heat shock protein 70	0	0.925																										IINEPTAAAIAYGLDK KQFAPEEISSMVLVK DAGAISGLNVMR ATAGDTHLGGEDFDNR YKAEDDVQK MVDYFLQEFK LSADDIER TTPSYVAFTETER MVEEAER MKEIAEAYLGK cLTPVEK NAVITVPAYFNDSQRQATK GQIHEVVLVGGSTR mVDYFLQEFKR ARFEDMNQDYFQK DmSTNQR ARFEDMNQDYFQK MSKGQIHEVVLVGGSTR
gi298712274	CBJ26725.1	7.2	30	14	2651	271.9	4.98	n/a	echinoderm microtubule-associated 6	0	0.4725																										GEGEGGEVATWATSTcTMTDGK SLEGNLLATSDAR VVNTLSDALGPITcIR VWTLSGGGLMQGK EIDLEGWIR STSAGLcK QLDAFQGAGAGSGGATcVR IDFSKDGNWIRAEAR IDFSKDGNWIRAEAR IDFSKDGNWIRAEAR IDFSKDGNWIRAEAR IDFSKDGNWIRAEAR IDFSKDGNWIRAEAR IDFSKDGNWIRAEAR HSPREEDGTIK IDFSKDGNWIRAEAR IDFSKDGNWIRAEAR IDFSKDGNWIRAEAR IDFSKDGNWIRAEAR VTAPAALAFTADDSK SVcFLDK IDFSKDGNWIRAEAR WVATGEAGAQPK IDFSKDGNWIRAEAR IDFSKDGNWIRAEAR IDFSKDGNWIRAEAR IDF…
gi299473104	CBN78680.1	4.46	16	14	3490	392.5	5.74	dynein heavy chain	dynein heavy chain	0	0.6865																										VIQLYETTLVR SLEGYLEQK ILTLANGDR LVITPLTDR IDKDWAK KGASDVELmKVQLK ATGNIEDWLGALEKGmQVSLK ILTLANGDRIPMTDNVK MNPKAIR FHYTFNmR QELPENLK ELFSSVPVMYVTAVTK ELEEAESK EEMQLR QLVETGGFcFLDKDKR GASDVELMK QLVETGGFcFLDKDKR ELVTHMGMVHRMVVEScADYFVQMR ERLVITPLTDR
gi299116981	CBN75085.1	5.05	30	14	4773	522.4	7.68	conserved unknown protein	ef hand family protein	0	0.534																										RSVmVTTPTSVK HLLTVGLDGLEGVVYLDDADRKmIVTR ELMRTQAFIEAQQGR ELMRTQAFIEAQQGR ELMRTQAFIEAQQGR RAFSAmKSAFEQYGK RAFSAmKSAFEQYGK cQVLDYFVRQR LmPLLAQWVLLWmRQRR RAFSAmKSAFEQYGK RAFSAmKSAFEQYGK ELMRTQAFIEAQQGR AEAAAEAELLDTLVGLVALK NTGLSSPR RAFSAmKSAFEQYGK RAFSAmKSAFEQYGK RAFSAmKSAFEQYGK RAFSAmKSAFEQYGK RAFSAmKSAFEQYGK TIWEATR EAWFVDVR RAFSAmKSAFEQYGK RAFSAmKSAFEQYGK RAFSAmKSAFEQYGK RAFSAmKSAFEQYGK RAFSAmKSA…
gi299471442	CBN79394.1	22.93	15	14	711	77.5	5.62	Molecular chaperones HSP70/HSC70, HSP70 superfamily	heat shock protein 70	0	0.925																										IINEPTAAAIAYGLDK KQFAPEEISSMVLVK ATAGDTHLGGEDFDNR YKAEDDVQK MVDYFLQEFK TTPSYVAFTETER MVEEAER MKEIAEAYLGK MPRDQREHPSR NAVITVPAYFNDSQRQATK GQIHEVVLVGGSTR mVDYFLQEFKR ARFEDMNQDYFQK DmSTNQR ARFEDMNQDYFQK MSKGQIHEVVLVGGSTR
gi299472214	CBN77184.1	3.26	16	14	6622	664.5	6.62	conserved unknown protein (Partial)	e3 ubiquitin-protein ligase ubr4	0	0.567																										ARSAASDSTILcmQTLR VTGSWQVRR YATAAAVGGGGGGGGSGGGSGSSGTGGR NSNPPPAAAAEAEPR NSNPPPAAAAEAEPR EDESAAGAGRAAAAGSSGQGR WERQPQDYVPNR AAMTLHGVVRRNLAASScGK FPIEIFESLENVTADPR ALMTLLLSDGGGR TATQYELLVGQQR AGALWGELSTKPWcK WWSALPPAPLANPSVR ARSAASDSTILcmQTLR VRRGGASYIPK ARSAASDSTILcmQTLR
gi298714886	CBJ27642.1	40.34	16	13	509	55.1	6.18	Putative	sperm associated antigen 6	0	0.8655																										LIVNSGGAAALVDYVADAQGNAK LANYSDDLAEAVVGNEILPQLVYSLSEQNR LIVNSGGAAALVDYVADAQGNAK LANYSDDLAEAVVGNEILPQLVYSLSEQNR HSPDLAQAVVDSGALDALVPcLEEFDPTVK GVAPLKDALVAEPEDHIK ISASAMSDVcK AASAWSLGQIGR QVcccLGQIAK cTHLQALQPLLR GVAPLKDALVAEPEDHIK VLLDKIDEFQPMVA ALAEGDVLR VLLDKIDEFQPMVA QFAQLLPHDVEAR NAATcIR HTPELAQAVVDAGAVAYLSPLIMHPDSK
gi298712832	CBJ48797.1	54.92	15	13	349	38.1	6.24	conserved unknown protein	guanine nucleotide-binding protein subunit beta	0	0.767																										cVQTFQGHESDINSVMFFPDGK LLFAGYDDYNcYVWDVTNSTGIPAYQLAGHENR FVAcGGLDNLcSIYELGQSTVmR FVAcGGLDNLcSIYELGQSTVMR VYAMHWSGDNQNLVSASQDGK SSWVMTcAFEPTQGR GEALcTGSWDTLLK LIIWNGYTTNK ILcGITSVAFSR AFGTGSDDSScR FVAcGGLDNLcSIYELGQSTVMR NVFVSGScDSLAK VScLGVNPK ELAAHDGYLSccR MADMTERLAVAR GHFGKVYAmHWSGDNQNLVSASQDGK
gi299117266	CBN75228.1	16.35	13	13	879	93.9	7.36	Serine/threonine protein kinase, possibly NIMA-like	protein kinase domain containing protein	0	0.697																										DFASTcIGTPYYMSPEIFK KRPDIEQILR HAFDAQSLNGLAGK HQLELEEEKR ALVNDMLATNPK IAAEMALNR TQNVFILSSGR VVLGDLGISK LGSLATSPLQSR RPDIEQILRK GQLLPESK VLGEGSFGK MEEYEPIKVLGEGSFGK SARGSTGGGSPRGGGENGRPR cSDGLGEAKFAK
gi298705961	CBJ29082.1	21.73	14	13	514	59.5	9.39	conserved unknown protein	ptype atpase	0	0.572																										AIITSLADEEAAR VITEQIEAR YNATLSER LREVEEAEKK MLNSLGAR mVEDMEKRGINPK ALKSDIEVER DKQLAEK ENMLEERQR mVEDmEK LEAREQENR YNATLSERER YLTEmK LREVEEAEKK LEAmRDKmVEDMEK LEAmRDKMVEDmEK
gi299116617	CBN76243.1	6.2	19	13	3324	370.3	5.86	dynein heavy chain dynein heavy chain	low quality protein: cytoplasmic dynein 2 heavy chain 1-like	0	0.6585																										ELQTAQVAADSAMEQIATALSEASLR TTAEHVITK EGNPIDAAGER SAEASQELDR DWSTAEVER LADSDSRTR LADSDSRTR SASFEHANIYRVSVAAAPLATWVKANIK EmEELAERTVGRGR FGYSYEYQGNAPKLVHTPLTDK MAGLDGEGGRWDEFDIAAEAFQEMVEEQK DImAKVEIDR GGLAGWVDDMFYRGLDYVLDR DSGAVGKTSSSASATPK FAVRcESNPALYNR VSVAAAPLATWVK FAVRcESNPALYNR FAVRcESNPALYNR FAVRcESNPALYNR mGMIFLSDEDVDVK MGmIFLSDEDVDVK FAVRcESNPALYNR
gi298708477	CBJ30601.1	44.95	13	12	376	41.8	5.49	actin	actin	0	0.9655																										cPEVLFQPSFIGMESSGIHDcTFK YPIEHGIVTNWDDMEK TTGcVLDSGDGVSHTVPIYEGYALPHAINR DLYGNIVLSGGTTMFPGIGER SYELPDGNVIVIGNER VAPEEHPVLLTEAPLNPK AGFAGDDAPR TAAESSQLEK GYSFTTTAER AEYDESGPSIVHR GYSFTTTAER HPGIMVGMDQK DLTDNLMK cPEVLFQPSFIGMESSGIHDcTFKTIMK
gi298708433	CBJ48496.1	23.49	14	12	694	74.4	6.68	flagellar associated protein putative: flagellar associated protein	flagellar associated protein	0	0.629																										VNDIIFPAGcSDLFITcSVADIR ITYWDAYDGTAIR SGGTIVSGWSDGK IQVPNLEcFcVGITR IVSGQANHMGVK VLALFEPNVFK VLALFEPNVFK GPVTcIQVSR VHAVDAQMGGMR LISGGGDGR YHPDESQYITcGSNHK AFYPESGK IVSGQANHMGVK QHLGHVR VAGKHcELmGAVTSIAVcPGNK VRVWSVTSSHQAmTTSWKEHR
gi298707584	CBJ30163.1	1.3	13	12	17422	1822.1	4.22	similar to titin isoform N2-B	function unknown protein	0	0	yes	1																								EFTASGLVEDSLYAFK SQPISESSAAYGTDYLQVTHEVQEILVNFR TSVQGILEAMK AYTVQYLSTSR NEFVVSPR DADDARVFGAVTVER FTAGSDEWDVAVDGVGGWAAEGR VAAVNSVARSPWSFLGYPGRPMTFSPTAEPK GGLLTSmVTPEGAGLEVGTGYSVRVK TYDGPDTNISVNDLTSTLARGDHLR GRWVVTSDGAEEPYVK FTAGSDEWDVAVDGVGGWAAEGR AEVIScNWHR DFYIRVSAQSDGVGYGDSAEASSNPVAPR YKIEWDPEETFGSGGDGGPLGSHQK
gi299470312	CBN78362.1	2.86	14	12	7858	803.7	5.39	conserved unknown protein	hect e3 ubiquitin	0	0.5925																										LADmRDDIGcLKLSR LADmRDDIGcLKLSR EADSLKR VGGDKHPDIVPGEYLLKVVYSK DGWSKPSPLSPLGAGGAAAAAGSAASSPVAPNSPSTTAQK GGGcKKGTMVSVAER LHGKNVGEEAR SPSLPVKQQVcAELSRLLDEAVQAVDR DAEISRcVRFGGR LcYDLKVLR SPSKKPSSTEFAEAAAAAAAAAAGGKQGR VGGDKHPDIVPGEYLLKVVYSK GQQSQGGGGGAKGRSGR GGGGLGGGGGDGREVGSPR LLDEAVQAVDRAHRAEAGPSSAPAAVR LSGKGGYWR
gi298708376	CBJ48439.1	3.81	13	12	3745	424.1	9.38	Hypothetical leucine rich repeat and MORN domain-containing protein	morn repeat protein	0	0.5																										TAYVHLGRQR ELFHEAVERLK LNLDAVR SLQGARVNQSHLETmLEEK DMVREEKEADEMVVHDR DMVREEKEADEMVVHDR EFFcDLPR IARERR mTPAATDSIGNRNGGR YPARVcLSEGAVDK EPGHWGTWITK DALLAWADRER AVRGYRK TAERMALVDK IEccKTKK ESLKLmK VTFVSNFGNTTAVAVNGVQVPVVSKR HDFEGLYEcR
gi298706359	CBJ29368.1	6.77	12	12	2535	259.2	8.98	zinc finger, CW-type with coiled-coil domain 3	morc family cw-type zinc finger protein 3	0	0.649444																										AGGGSAAAAEASVPR NGKMLSAAAAR SFVVRGGAGSRGGGASVR NGTAVSSSSDAR ASSRmDETSSTPR EAPAIGPSKR SAGERGGGSAK TGcKATNSSK AASESVDASDERAWR IDYDDGTQEVSDIPDSDIVIYPWRPLEQRVRPR RAAAGAPRTGGSAR RDPGSGSGLER SKQAQGRQHR mGETASGSGAGR SARAGPESMDIDEEKGVR ENEFSSGPPEVAEAKAGPVAcAQR
gi299470728	CBN79774.1	3.15	27	12	5620	599.7	6.46	C2 domain containing protein	c2 domain containing protein	0	0.4775																										MGNQDAFLGRVLPLEDQTLVK DQPETGVVR RQTHPDEcEFVGRLDLSVSR FKVAEDAHEARR QTQQSLFLKEITPYQREmHcIAR DQPETGVVR EHVQGSIGLcLAPATDGALSRLQESIDVEK DQPETGVVR HDGSMTKK DQPETGVVR DQPETGVVR AMDRVLNccKGFK DQPETGVVR DQPETGVVR GGAASFAGGAcRK AMDRVLNccKGFK AMDRVLNccKGFK AMDRVLNccKGFK AMDRVLNccKGFK MGNQDAFLGRVLPLEDQTLVK AMDRVLNccKGFK AMDRVLNccKGFK VPGRDEAAcAAR HIRARDmR AMDRVLNccKGFK MLSRVQALHDK DVLVGTATVPTRYIDHPPGDAWIPLAA…
gi299115711	CBN74276.1	25.78	11	11	600	66.7	5.45	putative, Dynein intermediate chain	dynein-like protein	0	0.693																										STDNLVGGSYNGLINFFDLR YHSAYLTSGcFSPTR MPVQSYVWDTMNPNTPDVALTPPSPLccLR DVPAFLLETVPcSTEYDDNYVAR DVDFTEQSDVNR YFMTVGDWTAR AGVFFVTR HVEGGWPK IWAEDLK SLGPIIGR TATSINWHPDGPTK YFmTVGDWTARIWAEDLKTPImTTK GLAVFRDPNAVNGIK
gi298709428	CBJ49241.1	5.75	12	11	2916	320.7	5.67	Dynein heavy chain	dynein heavy chain axonemal	0	0.6165																										DLLDAGLQNFcAEIEETcVAASK DMTWQTIVDTVVVGAMGPPGGGR EIKDFIEDEAPLMMLMSSPGIK ILASVDETQQLLDDHIVK LVITPLTDR TLGPcTMVLSDEIVVDAKSR AELPDNLK ETAALGKK LcSVETVMVGLEK VIPFLmNPK SSHSLSQARGLR VLEERGQMDSTQAGITALEEVALRLK TRNAGAGGKLVTAPFAAESR
gi299116767	CBN74880.1	2.66	12	11	5470	591.1	7.56	conserved unknown protein	copine-5	0	0.4865																										EDAmNISQADGKAGLQYHTLELcREGEK SSSVLSADLGSQRRPGTR EIGATAVR HSNNGPIARcYQTTGFRIR VAGIAEVcIR cRLEGPFTSSRFPDFTSSHPLLcLGDAER LMRAAEQRK cRLEGPFTSSRFPDFTSSHPLLcLGDAER FAQRTAER ILYGLHDDPmDLMLR TADSGGGGRLRPPQHPSR HRNPFR LMPSRTPRPSR
gi299117341	CBN75297.1	8.31	11	11	1757	190.8	5.26	conserved unknown protein	kinesin-ii 95 kda	0	0.5535																										AGEERRVAAR VEGVRGAEASTANKQLR RSMAEGRGR GEVEAALAEESARRSMAEGR TAEESLGVAKEEAAR ASRELAEK LSAGEQEAGDLKEGLGRR EELLSEQKEAFVEREEDLQR YVEIYNNVFHNLLEGVADGTSGNRRGK DKALSAANEER KLSAGEQEAGDLK ELEDLTSKmK ASRAQAVASALR
gi298711563	CBJ32625.1	18.55	10	10	629	71	5.73	putative, Dynein intermediate chain	dynein intermediate chain 2	0	0.728																										LVNTIKDDPEETSLSGLAGGccFDFNR HSEHLFLVGTEEGK ELNFFSISSDGR YWEDASDHFR LLTVADTKPVSG EGEGSLLPLWR ANRPIYSSSIK MEPVMQLK VASWVMSK GVVTEPPPMLSFR AAADEARK
gi298706898	CBJ25862.1	13.11	13	10	1236	135.1	5.05	conserved unknown protein	sodium potassium-transporting atpase subunit	0	0.6515	yes	8																								IIDcSDNMVVDNAPLTGESEPQKR TGTLTQNIMTVAQIVYGQEDGTHIEDcASSFTK QAADMILLDDNFASIVSGVEEGR QAADMILLDDNFASIVSGVEEGR LVIVENNQR VIMVTGDHPITAQAIAYK IAGWLER VGILWSK TTSPEVMDK SKIKSAGAPGIPIEAmQGLMLDGYFHYIPWK KmKVQGDGSAIEVHVVK SKIKSAGAPGIPIEAMQGLmLDGYFHYIPWK cATLcNVSVFQEDSKSNQNGPVPFKK EAVPGAVGK
gi299116304	CBN76110.1	4.05	17	10	4471	473.9	6.54	similar to neurobeachin like 1	neurobeachin-like protein 1-like	0	0.615																										FFLLDGLNSGLRLPRmPHWPAQK DVRDALDcLGGVK SLccDVQPALmDQLLHILPR DVRDALDcLGGVK DVRDALDcLGGVK MLFRPYGGMR ENDGGRISGDNGGGGLVGAGGGGAGPRGAGSIPVR LRSKLDQLGI YmVSLLKR DVRDALDcLGGVK GNADEANSHRGQNSGSGGADVLELRGGVWEHIGLSR KcQGPTVTWGDLRDQPPRPNPTDK VSYRTDPR SLccDVQPALmDQLLHILPR EQDSQLYESTmR SNRScDKAAmQGcK SLccDVQPALmDQLLHILPR FGGGRGKGGGGAGNGPPSTALVALQR FPGIVVTAVATASIAcHcPR SLccDVQPALmDQLLHILPR
gi299115536	CBN75740.1	6.7	11	10	2362	256.2	8.37	NB-ARC and TPR repeat-containing protein	nb-arc and tpr repeat-containing protein	0	0.721																										TDLQGQVTDPMGPPINPFSEPSR YAEANALYERSQAIR HVAMVLAGLGEGSGEEGKGAEGKDAEEGK KSSANWYSKLVG YAEANALYERSQAIR mSHGEHEWQPLRR WAKDGKcR LSGWDSPKNTQEDHSGGHEmTIGGR VVKFYEDPIVK ESVSTPTPIAVR GSGVAVLPTTDGEVSSER KSSANWYSK
gi298710136	CBJ31848.1	4.34	11	10	2482	257.1	7.15	conserved unknown protein	phd finger protein 15	0	0.5265																										MQAGFLPmQAPSSGGKGGAK KEGTPRK mQAGFLPMQAPSSGGKGGAK GKSLRVGcR ELEAESK EEYEAERR MGDLKHKR HDVDDPEVR ELEAESK FVcAPcTAR YRVIDGERDSGR HEQATKDGK
gi298708175	CBJ30515.1	6.74	10	10	1826	198.2	4.89	kinesin K39	kinesin k39	0	0.746667																										QREERK QELERANAAVLTAQDNTTDIEGLR EVESEVLGSQK ELESVNASAALATQENSVR EQAQVQEAELR TQEAVSARALADTLER LEGVQEDLR KEmDDVAMK AQETVSARALADTLEHR ALADTLEHR
gi299117257	CBN75219.1	5.22	10	10	2548	270.4	8.41	hypothetical protein Esi_0072_0084	hypothetical protein Esi_0072_0084	0	0.775																										ADPTSTIPAASQQR GWLEERcSLEHVRR RHANGAKLSPEPR ANQRQSK LYGPQEEELPNDSIDPRAYAR KEWEMLLALFSSNLSFATEGPGR RPQETSTTREAVVRNR REEEERER LEAEARRHNPPPPWK DPFEMTARPK
gi299116982	CBN75086.1	3.32	12	10	4791	526.7	5.74	dynein heavy chain	cytoplasmic dynein 1 heavy chain 1	0	0.629																										HLQFLGLLVTEGDSAGGGVSR mAAEELVQGEDLR KGEAEILSK QAQHVLSEAK GTVGGGVDERTR DFLGLIR AFAQQLSLcLGDTGGDVDKR GVTYIQEmRQRQK GWTAEGVSRER RLKDVDTATTESFEWLSQLR RLKDVDTATTESFEWLSQLR LGIRVGFQELNLGLLWGSALmGHK RLKDVDTATTESFEWLSQLR RLKDVDTATTESFEWLSQLR
gi299116405	CBN74670.1	4.54	13	10	2511	272.1	11.62	similar to asp (abnormal spindle)-like, microcephaly associated	abnormal spindle-like microcephaly-associated protein homolog	0	0.523																										DASTRIAAWWRAAAEAAR DAAVTVQSAMRGASARR RTVDAAKmIQSHWR RTVDAAKmIQSHWR EAEGVVSAAR AEASLYRK mRAMRLFR RTVDAAKmIQSHWR EAAVVVQAYLRGAAEAAR RTVDAAKmIQSHWR LVGAAVVIQSR MASARAEYR RTVDAAKmIQSHWR AEASLYR
gi298711130	CBJ32357.1	7.21	12	10	2122	224.4	5.52	conserved unknown protein	kinesin-like protein	0	0.664																										QERNVNGGGGSQPPAEIVYRPPSSGSR GDEGAASGTAGPGPGARGETGEAASRR LHQNREEQR QERNVNGGGGSQPPAEIVYRPPSSGSR GDEGAASGTAGPGPGARGETGEAASRR TGGGIGAEAEAAASMAATVGNTLPAR LQQQLDEEARR DARERLHGPLAR AKQSESSER WQPSRAK LQEQVLRMRADVGR QQIAEMEAAmKSTWEEK QQIAEmEAAMKSTWEEK LQEQVLRMRADVGR mSGSAcDAELGSAGETQEASGLR
gi298715266	CBJ27915.1	52.15	10	9	202	23.5	9.74	Flagellar Associated Protein	transcription factor iib	4.76461e-135	0.97																										LDEGWNQIQFNLSDFTR LDEGWNQIQFNLSDFTR ITDQDIQSSVLEIVGTNVSTTFITcPADAGK LYSEEELPPEFK AYGTNYIETLR ASNYQSTTR RAYGTNYIETLR RIYFSDR LFLPITK IYFSDR QEGQGAQQPLAAT
gi298707875	CBJ30272.1	23.45	9	9	354	40.5	4.92	GPA1, alpha subunit of a heterotrimeric G protein	g-protein alpha subunit 1	0	0.722																										YEIDGSTFEMYDVGGQR RAEYQIVESVK EVEAANAAAFQK LLLLGAGESGK TKEVEAANAAAFQK ILFGVVSAEEK YFFNEMER TSGIVTER YFFNEMERIKQDDFVATQQDVLYSR YFFNEmER
gi298709093	CBJ31041.1	4.95	9	9	2487	277.6	5.52	dynein heavy chain	sporangia induced dynein heavy chain	0	0.659																										NWLYLQPIFESPDINK HGLMLVGPTGGGK LQFNEIIVPTTDGVR EVVPTVDNNLAQSLMR VPAIVALR LSSAVVDATIEVFNTITR HVLTcGPTGTGK LVITPLTDK KFAMVDK GVDEINTVLDEQVTMTQAMQFSAFKGPFAER TTVGALTVIDVHAR ASRVFDNTGK VDcQRKR
gi299470595	CBN80217.1	5.42	9	9	2748	301.5	9.44	conserved unknown protein	function unknown protein	0	0																										EmIRSVDSIPAGARR SVDSIPAGARRSR ARHGSRGR DEGRSGGSVRLER DEGRSGGSVRLER SLAQETYTK GSGMVRGDRVEAR MPYSPPSRRNR IGRVNLDGTFNIDYDDGEK ENAQAEAFEALR
gi298715281	CBJ27930.1	7.85	10	9	2007	210.5	9.04	conserved unknown protein	80 kda mcm3-associated protein	0	0.4575																										FRANNPSRADSAEEETEHDLYNFVWDR IQEYmAK AEAVATAAADTEAKRHDVSR SRIMGGFGDPPPEAScSPPAFVAGGGSGGGAGGASKSK FAGAGGGGGGSGR LALESASPR GLTKQEKAR MAPLLVDSRPDGAKHRR MAPLLVDSRPDGAKHR mASSDAPTFVGGR
gi298713998	CBJ27230.1	4.66	11	9	3272	343.6	5.76	conserved unknown protein	translocator of the inner chloroplast envelope membrane 110k	0	0.51																										DAERAVGK EEEERQER EEERLGAEVKR TEVEESSKERSEAQEAVLADR AIEEVLGMTGVVcEELmAR AIEEVLGMTGVVcEELmAR LVmLKWTLGLSSQEVAScHHKVVEDAVSSVGAPVSmDK DRLGmSK GTTGGNQLQEALDKLDAALAEADR VLTASWK AGVKGmVPLATAIGLSVTPSR QMLRSALETSGDSIAEAQAGLEAELKGR LVmLKWTLGLSSQEVAScHHKVVEDAVSSVGAPVSmDK
gi298713385	CBJ33597.1	5.71	14	9	1719	186.4	6.46	conserved unknown protein	polymorphic outer membrane protein g i family	0	0.6315	yes	8																								KAMKSGGAFPGAGGDK WVmVmSLVGR IAMRPPK AMKSGGAFPGAGGDKK DDVGAGGAAVATMDDDEKALAKK DDVGAGGAAVATMDDDEKALAKK DDVGAGGAAVATMDDDEKALAKK DDVGAGGAAVATMDDDEKALAKK DDVGAGGAAVATMDDDEKALAKK DDVGAGGAAVATMDDDEKALAKK VDEMRAAIR QRLHLFAHEGEK WVmVmSLVGR YFEmATR DDVGAGGAAVATMDDDEKALAKK DDVGAGGAAVATMDDDEKALAKK
gi299473348	CBN77747.1	7.77	10	9	1745	185.6	6.9	conserved unknown protein	possible vacuolar protein	0	0.451																										VIAAVLEPVVQEEEDGSVEGR LSRSEESRTR LAFALWEGASPEARR TRSScAEVFNNLATERSLR SSVLHSGcIDNFTALcAMSGRImSR SSVLHSGcIDNFTALcAmSGRIMSR QHQPPAGIDGmPDPSVVDWEVAVVR TLLDMSKmEHR QTAmLYRIVER RTPPLTK
gi299472339	CBN77527.1	6.12	10	9	1749	191.3	8.95	conserved unknown protein	polyglutamine-binding protein 1	0	0.5655																										LIVVLAAEER DERQKDVLQQLAAEK QAELESR DERQKDVLQQLAAEK AGDEGRGGGVTSDAEGDNHcRK NNRQTGNK QDDTWR LREEADAQTQDQEAKEK HQLEVTEcGLLDLNARVR DEYDRFGGRETPSVLR DEYDRFGGRETPSVLR
gi298705595	CBJ28846.1	19.57	10	8	414	44.5	6.4	conserved unknown protein	camp-dependent protein kinase catalytic	0	0.7835																										MQQVEHMLNEK DLKPENLLLDR VYQLILAGK KLLVADLTK TTQTPWAIK DLKPENLLLDR LLVADLTK SLYmILEYVVGGEFFSHLR mNHPFIVK KAEIVRmQQVEHMLNEK TYTLcGTPEYIAPEVLLNK
gi298709092	CBJ31040.1	7.29	9	8	1577	176.6	5.27	dynein heavy chain	dynein heavy chain axonemal	0	0.6485																										DLDLALPALESAVAcLNSLK DLDLALPALESAVAcLNSLK LcEEISPTQTHQDFR AALAEAQEGLDIVMAQLK KADIDEVK QELEQKAER AIADDAQR EELVINGAAMNIELYGIESQILK DMRTSDIIIAGFYNPEILSK MMLFGLcFFHALVVER EVVATLQEELTVLQPQLVKTmKEVEDmmVQINSDK EVEDMmVQINSDK EVEDmMVQINSDK
gi298713578	CBJ27106.1	7.17	13	8	1933	204.8	7.84	similar to Dynein heavy chain 3, axonemal (Axonemal beta dynein heavy chain 3) (Ciliary dynein heavy chain 3), partial	dynein heavy chain axonemal	0	0.43																										TAAEATGVSEK GAAGAAEEGKQSGVVVER FPEGIDDQAFHVGKR ENANTGGFTcNEGGSNTRGVGGGLGSRILAPATPK GAAGAAEEGKQSGVVVER GAAGAAEEGKQSGVVVER GAAGAAEEGKQSGVVVER GAAGAAEEGKQSGVVVER GAAGAAEEGKQSGVVVER IDEDHLKR HWLcSAVSAK EmSENAASISK GAAGAAEEGKQSGVVVER QVDRGHR
gi299470830	CBN78653.1	5.18	8	8	1859	195.7	9.74	hypothetical protein Esi_0141_0038	hypothetical protein Esi_0141_0038	0	1																										SVENGTAAPAAAR ESGRSGKR GLHPTEHAQLSRMVDAWLRR ERTNGRGK RDKAEGR WSQEERGEK GGAGGGAGSSSPK ETEVSSSSAAK RPGSPARDDSRGR
gi298709312	CBJ31249.1	5.61	10	8	2241	234.2	7.4	conserved unknown protein	nipped-b-like protein	0	0.473																										SSSLGSGGRGKTGPLDmR SSSLGSGGRGKTGPLDmR DQQYcLMAMDVLGRVAGGLADITR DQQYcLMAMDVLGRVAGGLADITR TcSAAAAFSmLLR RARNSLSR DQQYcLMAMDVLGRVAGGLADITR SSSLGSGGRGKTGPLDmR DQQYcLMAMDVLGRVAGGLADITR GTGDEVLVQALRcFKDILEAEEDR DLLLPPSYSSPTTAR GGVAGRGKGVR TRVVTPAAEPAGAPR
gi298714575	CBJ27566.1	5.51	9	8	1972	216.3	9.54	conserved unknown protein	myosinlike protein	0	0.563																										FLAHRANLEVR HMEDVLLRSNTVLEAFGNAKTVR GQPAPRPATFPLGmSKEAFILAAGmVR YREAQRAAK ERMEAAATLQAAcRAK LARGNMAR MQQARALVAR MQQARALVAR mESWEGGQPmVEGFLK AASITSSFTDK
gi299115979	CBN75980.1	3.58	9	8	2864	306.3	6.84	conserved unknown protein	p-loop containing nucleoside triphosphate hydrolase protein	0	0.5725																										TAQAMDMIASGEVVK TAQAMDMIASGEVVKAR MDYLQQTKGGR LSTGGIWALDKNAR GGTWRER RSMSPTVK HIFTEIGmR GHDDPTDVLFR DPAGLPcRPcEREARAVDR NMETLFEFNEGLPSRFPKVLR FTGAPGTGK KIREAGGGVLFVDEAYTLEPQSGGGGK
gi299471336	CBN79292.1	4.07	13	8	3129	318.2	7.59	hypothetical protein Esi_0196_0057	hypothetical protein Esi_0196_0057	0	0.5625																										ALKSMPNVAR NKANLER GSGSPcSSPTQLVLDGGGGESGRVVDGR EGRMLcSGDLAFALSGcGETSREVNITR EGRMLcSGDLAFALSGcGETSREVNITR LDVSYKGR GAMASSITWASAAIPILPYTASWYc ASTWAGcSLTVDTR EGRMLcSGDLAFALSGcGETSREVNITR QQQQPQPQQQQTGAR EGRMLcSGDLAFALSGcGETSREVNITR EGRMLcSGDLAFALSGcGETSREVNITR EGRMLcSGDLAFALSGcGETSREVNITR EGRMLcSGDLAFALSGcGETSREVNITR
gi298714806	CBJ25705.1	6.33	8	8	1333	145	7.25	conserved unknown protein	nuclear condensin complex subunit smc4	0	0.5915																										DGVAASSKNK EAIDITAVTR LQDLRRR mDLSmRQEALTEDR QVAWGARRAPSK cIAERKR LQDLRR LEEMESILAKNNcEANQLR VASILADRAQSGSEQcIVISHRAEMQER IAEmDTESAKLR
gi298714566	CBJ27557.1	8.73	9	8	1930	203.1	7.5	conserved unknown protein	kinesinlike protein	0	0.5305																										KASSTAGPAVTSSSSEGGGGHHAASPVGVSRDR RSRAASSGTGDALSR MLGSVDARRGELSAVVR TSLLVGNGAPLTETPGESSQRAQSLPK cSGMGSVRPSAVSREWNSFDAmmVGLVPPPPPPPPATAVPPDR APNLSTALELVDVAQSRcSAcR TSLLVGNGAPLTETPGESSQRAQSLPK DVGARRPAENLEGMGK TSLLVGNGAPLTETPGESSQRAQSLPK AEESSPSAEVFERYEAHTGILEAENTSLR ENIDRmmSLLLEEVLPDR
gi299115832	CBN74395.1	5.72	8	8	2195	246.4	5.39	conserved unknown protein	u5 small nuclear ribonucleoprotein 200 kda helicase	0	0.735																										FLTVAEEEIAPVVETVR RGWAALAEK FQLmNEIcYEKVMAQAGRNQVLIFVHSR QEGVEEILGKMRPER GEEGTGEVESLHGRmKGQK QAIQEEMMADDAGGGPQILEALLK FYGDADISAKLAEDVLNVLmLTDERDVENK GTQMYSPEKGK VELAASVQPITR
gi298711434	CBJ32574.1	6.87	8	8	1609	174.2	5.58	conserved unknown protein	kinesin k39	0	0.89																										QREERK DMDDVSmKAQATLGVLYSQPPLTQDADVAK MEAFRKVYGAISATGVQDK SESARVGAEMAWEESR LLELQEVIR EEVETVKATLR RAKPEITPSSMmEQTR RAKPEITPSSmMEQTR ELAGAPTASLLALVDAR
gi298709333	CBJ31269.1	3.86	8	8	2488	265.8	5.69	ubiquitin carboxyl-terminal hydrolase 64E	ubiquitin carboxyl-terminal hydrolase 47	0	0.533																										SNREQESIAMEKETDK GGKGEGGEVGSVPTGLSPSAVWPDEEAAR KKGGGGGEGK GGKGEGGEVGSVPTGLSPSAVWPDEEAAR REDEVERR AGGIGDGLR GNAAAAAAGGK FEFDFETmERVKVK LTREmGIKK ASEDmDQSAWIDNILEQAGGFGR KRSSHGR
gi299470172	CBN78200.1	4.08	8	8	3264	345.2	6.73	hypothetical protein Esi_0103_0059	hypothetical protein Esi_0103_0059	0	1																										KPGAAPAAAGcRRPATTMNGK VDIMVAGSAVAGSTAR FVPAEQALLDGLEPQAmTVGR SGDGNEQGKMAAAAASR AAAGGPSLVQGFPcSRQPLR DMFQKDSWTVKNGNAMVDGIQLGR RPATTmNGK SGAVESGAmFDYSSK ATPADAAAQTGAGAGPADR
gi298715508	CBJ28078.1	16.43	7	7	479	52.4	5.21	S-Adenosyl homocysteine hydrolase	s-adenosyl homocysteine hydrolase	0	0.833																										VADISLADFGR ATDVMIAGK GTGPDIIVDDGGDMTLLIHEGFK cVGVSEETTTGVHR DESAAVFAWK GHVYVLPK HSLPDGLcR IVLTIIK GTGPDIIVDDGGDmTLLIHEGFK
gi298709034	CBJ30984.1	21.69	8	7	438	47.8	4.46	putative: flagellar radial spoke protein 4	radial spoke head protein 4 homolog a	0	0.5245																										ALDETLGEFDEALQEGK VAEDESINEAFPK SLAEDSEGSWGFR GDDYVVVEGK WPGAIAVAFGK ALDETLGEFDEALQEGK FTNVYSGDGVK TcPAGAGQSANAMVVAKSLR
gi298707666	CBJ25983.1	33.23	8	7	322	35.5	9.41	putative: flagellar/basal body protein, PACRG (parkin co-regulated gene)-like protein	parkin coregulated gene	0	0.7575																										ELEmPYAFLAEQGVYDMLSAGSNK QNDNLGDGIDYGQQR ELEMPYAFLAEQGVYDMLSAGSNK DFQAFAERPNPPNTEFR ELEMPYAFLAEQGVYDmLSAGSNK VLPVIPQLIIPIK GDLPVQIDHGGVHNR YLVPVFQSVVVS ETGSPFDATPIHSIK DFQAFAERPNPPNTEFR
gi298715544	CBJ34064.1	5.96	7	7	1270	143	6.61	Dynein heavy chain family	dynein gamma flagellar outer arm	0	0.6705																										LTSITEQLK RIEDPMER MGVSIPEGAKMVLLQEDR TAVmVFRVKGHNLLDYHSNR DPEVVSHYVELLEEWcSKIR YDWLWKEDK YDWLWK NGSDTGEK YFNTTAR
gi164665458	ABY66163.1	8.09	7	7	1162	135.2	8.9	origin-binding protein	replication origin-binding protein	0	0.4495																										KFISNQDMSLPAGK VDVRGLPENKK GIVTNGPmARLAAEVNTISEK EEMANLWR NMDHAQK YGHWYAHFLWILEK DYDFVPNTIKESK EQTmITDR
gi298707618	CBJ30186.1	3.34	9	7	2987	313	5.66	conserved unknown protein	function unknown protein	0	0.4905																										GAVVMSVEEELREPLK AFWFEIALWTScKR AFWFEIALWTScKR LPWGYGTGPFAEVFASK SSSNMRSNSSR ALETKSKEEIEHER EPLVEDVGDAR AGSGASLALPAAAEGGSGR DEEDIISQLEDDGTPWPSK EPLVEDVGDAR
gi298709271	CBJ31209.1	6.76	7	7	1425	149.8	7.93	similar to deubiquitinating enzyme 3	ubiquitin carboxyl-terminal hydrolase	0	0.574	yes	1																								NNSEISGGASSGGAKR EVAATARALTEAR DGAYLQMERDGLGVALAAKEGALSATQDR RELAETALDEKcEAAAADR GMAMLmKR cEAAAADRVEQQARIEK RAQKSQPASAAADTPK
gi298706147	CBJ49075.1	1.99	8	7	5219	555	5.76	Hydrocephalus-inducing protein, Hydin-like protein	hydrocephalus-inducing protein homolog	0	0.554																										VYEYYITVDVEGVGEELLSIPLK SATASTAAPGTAASSR FPVKAAGGGK TPSGPALRLSGAK LDERHR VGDSANERFTLRNR TTASYNTPNSGAGGGSAGSKR ASESLYcEAR AGGRVcFAIEQLmFTFGSVVSSQVPVGIcER TPSGPALRLSGAK
gi298707521	CBJ30123.1	4.41	11	7	2656	286.4	6.14	conserved unknown protein	ubiquitin carboxyl-terminal hydrolase family protein	0	0.5605																										DHDQTPPDDSLMWQLQNmFSHLQDATR DHDQTPPDDSLmWQLQNMFSHLQDATR MLVVMHEVSRPTAETGR IHKELRTMGGR VSHEMAHPANQVR IHKELRTMGGR KNVLDKSNYAFLQK IHKELRTMGGR IHKELRTMGGR IHKELRTMGGR IHKELRTMGGR SSGGIGGTTSSSQSAAEDRDR NAFmLVYDR IHKELRTMGGR
gi298714975	CBJ27696.1	6.22	7	7	1295	141	9.6	conserved unknown protein	serine threonine-protein	0	0.53375																										YDEFLR GNTDFFALQEEDHLEQIKLAR VPEPSRQGYFK QGYFKRFTASGGDIDSTSPMK DELAQVLR TGLDmGVNRHEEK ATALNPSLAGDAR
gi298706915	CBJ29742.1	7.41	7	7	1270	135.2	9.96	Histone hairpin binding protein	histone gene transcript 5 hairpin-binding protein	0	0.7255																										RGWADGRFVNLGGGEK mAAGAAAFSKGRGGK SQGDASREQYSTAAALDRAK SLTMTSPSMTmASSSLSPREENR FAERSSSSRTGR DGmSSRDGISSR SSRDGmPSR RGWADGR
gi299117147	CBN75111.1	35.85	8	7	219	25.1	5.8	p28, 28 kDa light chain of axonemal inner dynein arms	axonemal dynein light chain p33	7.3263e-139	0.777																										ETGIcPVREELYSQcFDELIR LDVTNLQEQLDQK QLQEDKADLER QVTINcAER QVTINcAER KALIAEQR ALIAEQR DEIHMTIAAYQTmYESSIAFGIR QVTELSAKcEQVKPREAER DEIHmTIAAYQTMYESSIAFGIR
gi299116118	CBN76027.1	13.39	12	7	717	77.7	4.98	actin-1	actin	0	0.586																										DNAKMELSmSKPYTLPDGTRVTLGR DNAKmELSMSKPYTLPDGTRVTLGR DNAKMELSmSKPYTLPDGTRVTLGR DNAKmELSMSKPYTLPDGTRVTLGR DNAKmELSMSKPYTLPDGTRVTLGR DNAKmELSMSKPYTLPDGTRVTLGR DNAKMELSmSKPYTLPDGTRVTLGR DNAKmELSMSKPYTLPDGTRVTLGR DNAKMELSmSKPYTLPDGTRVTLGR DNAKMELSmSKPYTLPDGTRVTLGR GSLPSTWHKEAVVMDVGSGWTR YRAAELLFDPAMSLR EGVAAEGGSGGGGGGGR RANLPDR ELTKASR VcFVSEDVDK
gi299471628	CBN76850.1	9.05	7	7	1481	163.1	6.57	expressed unknown protein	expressed unknown protein	0	1																										HSLAASGGDERSGGAGVGSAPSTAEEGLDmEVAR ELELAMNQR RESIQDLKDHGVYQPENSLR EVKAQIAEGDVYVEDLESAWLEAcAVK ENDcGSGSRLLLPGSRLADWAPVR EDLRATMAAKLSARPDLDK EALDSTMRHDDAIWR EAEHEKLEAER
gi298712007	CBJ32946.1	7.98	7	7	959	101	5.95	conserved unknown protein	conserved oligomeric golgi complex subunit 3	0	0.4325																										QLYFEK LNFGSTRMALRK AVDmGVFEDLAQLSVAAcAESLK ETAAASSSSNGTDETKGSSSPR LIYmATK SHLEAmSK ATEGILLHPVQR MALRKFIR
gi299472383	CBN77571.1	6.61	8	7	1264	138.3	8.07	similar to CG7697-PA	myotubularin-related protein 2	0	0.5765																										QMFVSHPQVAEALLHmQVRLGMFK QMFVSHPQVAEALLHMQVRLGmFK RGTPHGRTDQSSTATSR MLPIVDcRPR MGVLKPRR SAGISSGATRGSSR RSSVNSELSYEDDRGR MQHGRRDK mQHGRR
gi299469738	CBN76592.1	4.47	9	7	2802	283.4	6	WD-40 repeat protein	wd-40 repeat protein	0	0.4675																										KLDAEANLAVEFKDPALASEIVcR VFLYEmASIGMRAK GSDVGANSDPVQGKETLPATVAAAGGAEAR GSDVGANSDPVQGKETLPATVAAAGGAEAR VFLYEMASIGmRAK GSDVGANSDPVQGKETLPATVAAAGGAEAR AGQSAGESALEEEQPR RESGAPPNPSVGSGKR mFHWcmVR SAEVGGDQSmGGGRRSGGEVAVR
gi299116428	CBN74693.1	5.94	10	7	2004	206.9	9.42	conserved unknown protein	leucine-rich repeat-containing protein	0	0.6125																										GPPPPPYPGRNQRASR GPPPPPYPGRNQRASR EGLSASLR RYSAGLVSLIRccLVVDPAR DEARTLQAFmLLTK DLRAAAALDGGGGGGGGGHTASPSRmPPEK DEARTLQAFMLLTK ERTHPPPLPPRR HRNIIALVGATTHPVTcVmQYcSRGNLmVLLDDR DEARTLQAFmLLTK
gi298715358	CBJ27986.1	5.83	7	7	1621	170.3	9.69	conserved unknown protein	protein xrp2-like	0	0.597																										RVEQAKQAEEAHR TLScSGSGSNR mGTKSGQPRSVDR LGSSLSSGSSGSRMGTK VRSSGALSSRScTR EAEAASAVATAVTAAVAVAGR IGWDPTR
gi298714795	CBJ25694.1	8.74	20	7	1162	126.3	4.74	ATP-binding region, ATPase-like	mhck ef2 kinase domain family protein	0	0.5515	yes	3																								VDLcFVMDcTGSmGSWINQAKKK VDLcFVmDcTGSMGSWINQAKKK VDLcFVMDcTGSmGSWINQAKKK VDLcFVmDcTGSMGSWINQAKKK LRGDNEEATR VDLcFVMDcTGSmGSWINQAKKK LRGDNEEATR LRGDNEEATR LRGDNEEATR LRGDNEEATR LRGDNEEATR LRGDNEEATR LRGDNEEATR EVMIETEMK LRGDNEEATR LRGDNEEATR LRGDNEEATR LRGDNEEATR LRGDNEEATR MYHDVPDQYPKGcPK TmTTVVKFANEPLESGDVDAAQQNNmGALTLFK TALmDVPFRGMQR LRGDNEEATR LRGDNEEATR LRGDNEEATR LcILFADAPcHGK
gi298705729	CBJ49037.1	6.6	14	7	1781	194.8	7.21	conserved unknown protein	conserved unknown protein	0	0.535																										ESGSSGEDGALEPTPALSTTSMDGTRPLAAYR ALDDLSNIADALEKER ESGSSGEDGALEPTPALSTTSMDGTRPLAAYR ESGSSGEDGALEPTPALSTTSMDGTRPLAAYR ESGSSGEDGALEPTPALSTTSmDGTRPLAAYR ESGSSGEDGALEPTPALSTTSMDGTRPLAAYR ESGSSGEDGALEPTPALSTTSMDGTRPLAAYR cVGSAGRAGGGSGGGSQQGR ESGSSGEDGALEPTPALSTTSMDGTRPLAAYR ESGSSGEDGALEPTPALSTTSMDGTRPLAAYR ESGSSGEDGALEPTPALSTTSMDGTRPLAAYR TcADYEAKIKAIHDSR HYNLmKPAMDTVK ETNGGSSGTGGSNEK
gi298708957	CBJ30910.1	5.04	7	7	1588	174	5.24	conserved unknown protein	sperm flagellar protein 2-like	0	100																										RIVQVEK cSFIRGGPLLHmGTTVAEPAK AImTENR DMVQSQKGINLERSLR ADLVYGELQRcLDERVSEEQR ADLVYGELQR NRELRIHR
gi299116011	CBN76011.1	41.67	6	6	188	21	5.3	ARL3, ARF-like Ras superfamily GTPase	adp-ribosylation factor-like protein 3-like	2.77142e-133	0.859																										NYFDQTDALIYVIDSADR QDLLSALSSDEISQGLNLHTIR LNVWDIGGQK LSEEDITHIMPTQGFNIK ILVLGLDNAGK NYFDQTDALIYVIDSADRR SLMHEDFK
gi298705466	CBJ28741.1	15.12	7	6	505	54	5.26	conserved unknown protein	protein phosphatase 2c containing protein	0	0.5505																										VWLDAAMTQIGLAMAR VWLDAAMTQIGLAMAR IEAAGGFVSPPPEPGLSSR ENNLWIANAGDSR SIGDHAVK QSQDRRK AVLAHEDGAELK AVDLSVDQNPNSPK
gi298708323	CBJ48386.1	50.81	8	6	124	13.9	5.12	calcium-binding protein	calcium-binding protein	1.07441e-86	0.577																										TGNDQINYK MAIGAMANATHFEK FVELAQR LFSMFDK EGNPYTITR TGNDQINYKEFVGGLAPLcHGTVEEK LFSmFDK LFSMFDK EFVGGLAPLcHGTVEEK
gi298709091	CBJ31039.1	8.06	6	6	823	91.2	8.69	conserved unknown protein	ef hand family protein	0	0.533																										LQHGTcTQAQLAR SAASLTSEALMGR LEGLSEEEER LEGLSEEEER KSAVTNVEQAVR DQTQLFDAPQK HPGMGSGGLcSRER
gi299115456	CBN75620.1	16.57	6	6	368	41	9.99	ef-hand domain (C-terminal) containing protein	ef-hand domain (c-terminal) containing protein	0	0.485																										ITNSGLTQGK IVDADLTTR HNFPNLLR EGScIPDYITK SSKSQPILR EVAAEGRHNFPNLLR
gi299116919	CBN75029.1	17.32	6	6	383	43.3	5.01	conserved unknown protein	calcyphosin-like protein	0	0.516																										ELESLFDRYDEDcSNTIDYK LDYNQFFAAMTR cYDPASHPDVASGR cYDPASHPDVASGR LNFVGVQR IMGFFDR IETmTGFK SKIETmTGFKDLEGK
gi298709427	CBJ49240.1	5.01	7	6	1691	188.1	5.33	dynein heavy chain	dynein heavy chain axonemal-like	0	0.737																										TLENAVQFGQPVLLENVGEELDPSLEPLLLK VSYISLGQGQGPVAER ALNYTAGEcNYGGR VAIcEAVRPFAK LAEEELEVTmAQLR mTIEAPKGLR VAIcEAVRPFAKK LAEEELEVTmAQLR LILAGAENK
gi298713170	CBJ26926.1	3.05	13	6	3152	322.9	7.9	hypothetical protein Esi_0050_0074	hypothetical protein Esi_0050_0074	0	1																										AVLRGSSNDGGGKTAVGVGDR AVLRGSSNDGGGKTAVGVGDR AVLRGSSNDGGGKTAVGVGDR AVLRGSSNDGGGKTAVGVGDR AVLRGSSNDGGGKTAVGVGDR AVLRGSSNDGGGKTAVGVGDR AVLRGSSNDGGGKTAVGVGDR AVLRGSSNDGGGKTAVGVGDR RGAAGSTGGGEVPEELGK AVLRGSSNDGGGKTAVGVGDR AVLRGSSNDGGGKTAVGVGDR DmVLDAGEAER AVLRGSSNDGGGKTAVGVGDR AHTGKPSNK RIGDLAGVLVNSSLR SGERHHRSAVASQVAEALR ETTIPEDERGVK APSSSKGSARDLESK DGWSSLLASSPAEAAMVYR
gi299470296	CBN78346.1	5.21	6	6	2016	215.9	5.47	villin	protein flightless-1	0	0.435																										KFQDVYEQRVVQmSK SmLPEWQKGNNAENPPGR GRTGGGGAAAAGKER ALPGPcSIR EADQQQNNRGLAATGRR SRSRSGSVVDNEGLQGALEQAEK mGGSSDASEDDTAVSHSWADTIPPDSPPLQR LVGAATSSWSR
gi299470072	CBN79249.1	3.88	6	6	2112	230.3	5.16	WD repeat protein	wd repeat-containing protein 52	0	0.5435																										ELcEEVTR IWDFLTK EPFEASALELSERMR GSVSRPKLVADAGmDSHILFTR GSVSRPKLVADAGMDSHILFTRMGLDR QFTLEKELNTSGGGAALGSR ESRLDHEETLAELQKATDEHK LDVVVSLK cVDQSANcVPQMFHLK
gi299116130	CBN76039.1	3.6	10	6	2261	232	5.49	conserved unknown protein	eukaryotic translation initiation factor 2-alpha	0	0.5325																										SMHEVHIQR SADGRGNSGGGGRSGVGR EGRGSLGR HGATAmANMTTITRR HGATAmANMTTITRR HGATAmANMTTITRR YPHPLGmASR HGATAmANMTTITRR HGATAmANMTTITRR HGATAmANMTTITRR GGGSGGGGGGGGGKATGLLQPGLR HGATAmANMTTITRR NGSPDVVVTGDDR
gi299469855	CBN76709.1	4.52	8	6	2710	283.6	7.12	bromodomain-containing protein	bromodomain-containing protein	0	0.572																										EASAAVAVGGGSGATAGSAAAAAAAPGMGVALSLEGAAAGAK KLVVRcDSEVVEGER SGRKGEGGATTNLEDR AADVVKTTPEEGAATLSSALSPSWLRR SGRKGEGGATTNLEDR TRGVTESIDPADGGVGLGADGHLGLIAPDIKIR SGRKGEGGATTNLEDR ALRWDIIPRPR YVQTPMDLGTIDRK DSSQSPTAAAAAAAAAAAAGPPNNSSSKKPTTIKIAR
gi298708327	CBJ48390.1	2.2	7	6	3320	353.2	6.32	flagellar associated protein	flagellar associated protein	0	0.434																										LIVETEDIR TSREGGAGARK GVKGGSRAGGR EVLPNQVAGGAR NTARSGMSGLANGNGSGGAGNNKR RPTPAVVHSRTmEFGTVcDEK LLTAmGKLK
gi299470615	CBN80237.1	4.51	6	6	1910	197.8	6.35	conserved unknown protein	function unknown protein	0	0																										HLRAVREWPPLGGGAGGGGK HLRAVREWPPLGGGAGGGGK RLSELER RGGVGALLNLAAR RQRPcGGAGAGGAVVAGARGGGHGER NGGALGGDLAR QEIAILR
gi298709586	CBJ31412.1	10.47	7	6	1137	118.7	9.91	conserved unknown protein	tubulin-tyrosine ligase family protein	0	0.509																										ESTNAGALTTREELFPGAAAASGR SGGGGAAEGPAAGSLVDITPDGFVLPGDRR LVPSmFPDR EMNGAAAAAAVAAAATAPASGGVQK ESTNAGALTTREELFPGAAAASGR EmNGAAAAAAVAAAATAPASGGVQK QQGASGRIVDSmASVTNGGAPPSDAEPARGGGAR GGGVARLGDELPGSSPWSGSGGERPASSATSR
gi299472490	CBN77275.1	5.3	10	6	1663	170.2	4.63	expressed unknown protein	expressed unknown protein	0	1																										ASGRGGSSVGGSSRGTDAVAGSVTGASETK RKEVPVVTPLAPmPGFTSFSPR RSSSVGPRPRAR ASGRGGSSVGGSSRGTDAVAGSVTGASETK SVTSTPVR IEGFNVAASKAK EGcTFmPNFSIGR ASGRGGSSVGGSSRGTDAVAGSVTGASETK ASGRGGSSVGGSSRGTDAVAGSVTGASETK DQSEATSLYEAPELGNGK AHEEVGTR KEVPVVTPLAPMPGFTSFSPRR
gi299471452	CBN79404.1	4.24	8	6	1757	189.1	5	conserved unknown protein	centrosomal protein of 290 kda	0	0.635																										EEAARANER DRVDNLETQLEDKDR AAAAAAAAAAAAGGDKDKDK NPGTVPSHPR EFDEKQKASK AAAAAAAAAAAAGGDKDKDK AAAAAAAAAAAAGGDKDKDK AAAAAAAAAAAAGGDKDKDK
gi299469769	CBN76623.1	5.22	9	6	1762	184.6	5.25	conserved unknown protein	baculoviral iap repeat-containing protein 6	0	0.599	yes	1																								GDGPAGPDTTAGVcRRWWDAAWGAGEVEAAR GDGPAGPDTTAGVcRRWWDAAWGAGEVEAAR GcEKLIR GDGPAGPDTTAGVcRRWWDAAWGAGEVEAAR GDGPAGPDTTAGVcRRWWDAAWGAGEVEAAR RDESVAEPAVDTAELRR VATETmR GDGPAGPDTTAGVcRRWWDAAWGAGEVEAAR GDGPAGPDTTAGVcRRWWDAAWGAGEVEAAR GDGPAGPDTTAGVcRRWWDAAWGAGEVEAAR AmTTKGVAR ASmATSTTAASTPPSPDVATATGGVSmSGGGGGGGGR
gi298711194	CBJ32416.1	5.78	7	6	1819	179.2	10.62	expressed unknown protein	expressed unknown protein	0	1																										GcRRLSSSAPPPELR SKEAEDRR ADGAAAGRVGGRGWR GDNGSSKSPMVVSKGGK GEVEDEHRLSARGTLQASAGSGAER SWAGEDDKVGGAASTANPGR FQNYQNFITDRPGKFDER
gi298710898	CBJ26407.1	7.95	8	6	1170	119.4	4.56	conserved unknown protein	conserved unknown protein	0	0.483																										RPELEWVVIPGGRVSPPEFDEDGNEK VNAGVEAVYmScLTmcAAAGDGSLAR VNAGVEAVYMScLTMcAAAGDGSLARDVLR MRSDPSRYPAPNTVcHNAALmALmR mRSDPSRYPAPNTVcHNAALMALmR EGEATTAAASRR mRSDPSRYPAPNTVcHNAALmALMR EGEATTAAASRR RmRSDPSR AAGVATDDAAEVAAAAVAAAAAAADSGTAPK
gi298705309	CBJ48999.1	4.42	6	6	2249	236.4	9.28	trithorax 3	histone-lysine n-methyltransferase atx3	0	0.5575																										GGcFVcKKNDK LELDHFGK SEGELAARR VEAAVEVAVAVASSPALLYTRGEmGEEESALR RPPSSSSSNDGGAGGGGGGRPARQEK STVQGFGVFTTQAIGAHELVAEFVGERIK RPPSSSSSNDGGAGGGGGGRPARQEK
gi299470698	CBN79744.1	13.65	8	6	546	58.4	5.41	conserved unknown protein	t-complex protein 1 subunit theta	0	0.7265																										MAKSMGMNLASGLQGmLK SGEGVVDLMSTKESALR SGEGVVDLMSTKESALR LLGGSTADSHVVRGMVVQRDSQGLVK GmVVQRDSQGLVK MAKSMGMNLASGLQGmLK YEmMVIKVLSK YEMmVIKVLSK TAHANGEAK
gi299469631	CBN76485.1	4.98	10	6	1817	189.7	5.68	outermembrane protein	kelch repeat type 1-containing protein	0	0.5105																										AVHFTAGcSPPGGRQR RPSYGGGGGRGSATSFGYAEGGGGGGGGSGAALSRRPSSR LASVDGDGDRR LASVDGDGDRR LASVDGDGDRR LASVDGDGDRR LASVDGDGDRR LAKLSAGRVLLDR TcSNTPWGGR LASVDGDGDRR FLLADFDVSK
gi298711949	CBJ48636.1	5.31	7	6	1243	132.6	6.76	Trehalose 6-phosphate synthase, family GT20 / Trehalose 6-phosphate phosphatase	trehalose-6-phosphate synthase	0	0.5245																										AcQESLSELADRMNAK EEGSREEVDR AcQESLSELADRMNAK LDTNcARR VSmHEVGIANPAR FSDSQHFmTScRR RLDTNcAR
gi298709544	CBJ48559.1	9.11	8	6	1307	135.2	5.03	hypothetical protein Esi_0025_0128	hypothetical protein Esi_0025_0128	0	1																										SASVVRLMELEAK LRDmPDELVYAIAGALDDAAIEMEEWAEGKK VLSPPPATGGDQDHGSAGR SASVVRLMELEAK ESAAGRLR AGLMSITKGVEAAAAcm SFSINNSQLHRLNDSDSSLELTGTFTTSEEVR SASVVRLMELEAK EKLDVQLGLRLWcQPITLLPDK RRASLQEmMK
gi298710228	CBJ26303.1	3.81	6	6	2322	259.1	7.02	Hypothetical leucine rich repeat protein	histidine kinase a	0	0.484																										DmLWRPLHGSVDLSFNSNRIRTK mAKKQAFLcAR NFELVDKTIRPVIESAcNGRGVEGNR FTTLDITNAPMR FERPGPIANDPLNR LRSWDAAmTEVK ITELQTAKKVMAADEYGPVLK
gi298707381	CBJ30016.1	4.69	7	6	1813	183.8	5.3	similar to kinesin-related protein	cell wall surface anchor family protein	0	0.745																										VTSSAGDVRVDANGPDGSVVVR VTSSAGDVRVDANGPDGSVVVR DSVRLGAmAAVLRHR QSGEAQEGSTHNHWVVSQLAAGRDKK DRLAAQEEQTK SFEVAIAATGEEQK HREHLmALRQmDK
gi298705128	CBJ28571.1	5.76	5	5	1204	128	5.67	conserved unknown protein	multidrug resistance protein 1	0	0.6615	yes	11																								SQIGYVGQEPVLFQGTIR AIIKDPAILLLDEATSALDSESEK AGGVATEVLSGIR AGGVATEVLSGIR QMVNAGPK TEEEIEADIQAR
gi298705125	CBJ28568.1	6.2	6	5	1295	136.7	5.49	ATP-binding cassette, sub-family B (MDR/TAP), member 1A	multidrug resistance protein 1	0	0.625	yes	11																								AIIKDPAILLLDEATSALDSESEK NPPILLLDEATSALDNESEK TPPIDSSSK SKEEQEEK STcmGLLLRFYEPSK STcmGLLLRFYEPSK
gi298714863	CBJ25762.1	11.66	5	5	503	55.6	4.59	n/a	radial spoke protein 7	0	0.5285																										GADGDGSGALDR EVADAVAGVMcALK TLQEVQDQHILLK ESGLGFTR QAEGLAKVAGLSADEFTR
gi298707150	CBJ29923.1	6.19	5	5	1266	134.8	6.51	conserved unknown protein	kinesin-like calmodulin-binding protein homolog	0	0.665																										SLSALGDVIGALTTGVK DLLAQAQALR DTGYLVTSTVDGYNVcIFAYGQTGSGK LGDEETLFNELANQYSAQEDPTVTALVEGAAR VLSEEAAALR DMEMKAKEESDLVHEcQASVAAAK LmQVDDmLK
gi299471671	CBN76893.1	6.13	6	5	1033	111.5	5.64	conserved unknown protein	kinesin family member 17	0	0.7805																										GGIIGMETALFQISIR NKPKINEDPK EEIEALK LPLLAPPGALHGDGGGGFDGDTNSPASGRmSSAK INEDPKDAmLRQYK INEDPKDAmLRQYK ADVEKQAR INEDPKDAmLRQYK INEDPKDAmLRQYK
gi299471619	CBN76841.1	8.43	5	5	759	83.6	6.06	conserved unknown protein	mitotic spindle assembly checkpoint protein mad1 put	0	0.662																										AEAALGEAIAGRDQAIK RLRLGGGGDSSEAASSSTAIAR DNPAARAAEAAK LRNEHNHTRLAK DEKEEWSLVFSR MLKQENDGLKK AVFGKKAAVLmEEISYLR
gi298715638	CBJ28164.1	5.16	6	5	1343	147.6	5.01	conserved unknown protein	wd repeat-containing protein 96	0	0.5255																										EIQEAASNPIDMAEMMAQLVQLYK NETLPELEKmERSEFVVDVAGR SPEELALINKVKQmR EAEEYEAKLK EIQEAASNPIDMAEMMAQLVQLYK RSPEELALINK AWPGLLDEDDDGSDDEDK
gi299472515	CBN77300.1	5.48	6	5	1508	161.3	5.06	conserved unknown protein	tetratricopeptide repeat protein 18	0	0.5765																										VEHLGMLADDAEAR TAVRVMHDAcAWLLELGLPGMARR VmHDAcAWLLELGLPGMAR SSFLHRTSIRELR EIGNcYVAAGR TAVRVMHDAcAWLLELGLPGMARR EEVLMRcGNLLRK AVIDLAPLARPAAVmSHPAVAAGSLVDSDARDSPLR
gi299117202	CBN75166.1	9.62	6	5	551	62	5.12	conserved unknown protein	flagellar outer dynein arm-docking complex protein 1	0	0.4995																										GGGGGSGGGGGGGGGRGISR SmQVISNYTK EDILAQNREAKK EDILAQNR mEKKVAAMR RVPQRGGGGGSGGGGGGGGGR EMESRMEK RVPQRGGGGGSGGGGGGGGGR RVPQRGGGGGSGGGGGGGGGR
gi299471205	CBN79061.1	6.3	5	5	936	102.6	8.16	Mannosyl-oligosaccharide 1,2-alpha-mannosidase, family GH47	mannosyl-oligosaccharide alpha- -	0	0.6715	yes	1																								YLYLIQDPDQK ALAYTcYQMYERQKTGLAPEmVTFEK ARDWVKDK YADKVNKVFDHMYGLPSK SEDSLIAQAVEQPSLK ALAYTcYQmYER
gi298710552	CBJ25616.1	3.28	5	5	2043	222.7	7.66	Ankyrin, TRAF-type zinc finger protein	tnf receptor-associated factor 4	0	0.476																										SSGVAVISSRSFQAmQSR GQTATWWANR AEVDEEAAPTVQEGDR VRKmDmDLHQEK RmEYVIEMMGR DScPLQREPcR
gi298706716	CBJ29665.1	7.72	5	5	768	82.3	6.87	SUDD-like protein	rio kinase	0	0.7175																										FESKLNIASRDGGGGGGGGGPQSQSVR NGGVKSEK KMVKVWAEK NDIKRSEK MKTFGTSESK
gi299470662	CBN78602.1	2.6	6	5	2773	298.5	8.75	membrane acyl-CoA binding protein	ankyrin repeat-rich vertebrate like protein	0	0.5485																										KELGASEKELTALER SVGYHFPEK ELTALER mEIAALHTAEER SVDAFGVGDDK EEENHRR MLDTVLLDGTGGGQAEIFFFTAADGTVR
gi299117476	CBN73979.1	4.22	17	5	1454	149.4	9.13	hypothetical protein Esi_0009_0152	hypothetical protein Esi_0009_0152	0	1																										LEETRATVGDREAELQR LEETRATVGDREAELQR LEETRATVGDREAELQR LEETRATVGDREAELQR AATTLPDTR LEETRATVGDREAELQR LEETRATVGDREAELQR LEETRATVGDREAELQR LEETRATVGDREAELQR LEETRATVGDREAELQR LEETRATVGDREAELQR LEETRATVGDREAELQR LEETRATVGDREAELQR LEETRATVGDREAELQR LEETRATVGDREAELQR AATTLPDTR LEETRATVGDREAELQR LEETRATVGDREAELQR GYADSSFVGRK mTTTLMGELEALQSR mTTTLMGELEALQSR mTTTLMGELEALQSR GQTETLRRK mTTTLMGELEALQSR
gi299116033	CBN74449.1	7.18	11	5	1606	160.2	5.87	conserved unknown protein	conserved unknown protein	0	0.542857																										NIHVWSFVPDLASGGGAAGGSGGGGGGGGRGK NIHVWSFVPDLASGGGAAGGSGGGGGGGGRGK QRLEAGALQmAQQMEVPKGK NIHVWSFVPDLASGGGAAGGSGGGGGGGGRGK NIHVWSFVPDLASGGGAAGGSGGGGGGGGRGK NIHVWSFVPDLASGGGAAGGSGGGGGGGGRGK NIHVWSFVPDLASGGGAAGGSGGGGGGGGRGK NIHVWSFVPDLASGGGAAGGSGGGGGGGGRGK NIHVWSFVPDLASGGGAAGGSGGGGGGGGRGK GHDVFPPPLEcVIDMGR GGGQWTcLYDTHTNGATVELVAFR GGGQWTcLYDTHTNGATVELVAFR GGGQWTcLYDTHTNGATVELVAFR GGGQWTcLYDTHTNGATVELV…
gi298708941	CBJ30895.1	11.43	6	5	487	56.3	9.29	component of dynein regulatory complex	growth arrest-specific protein 8	0	0.7285																										AmKTVRER LmYEIAQENKKmSEPLR LmYEIAQENKKmSEPLR QRVKHLLYEQQDDVTAK KmSEPLR KmSAEVSLK LMYEIAQENKKmSEPLR
gi298707422	CBJ30051.1	2.25	5	5	2177	230.9	7.72	conserved unknown protein	cytoskeleton-associated protein 5	0	0.48																										QFKDSNFNVLK RmGVLGAR LQETTSSLLTSAAESFGPSWVARR RmGVLGARDAVGTGGGR DcLPRmQcIK
gi298707329	CBJ25956.1	3.42	11	5	2087	223.2	7.36	Aquarius intron-binding protein similar to aquarius	intron-binding protein aquarius	0	0.6805																										MATPISGVSITEVK MATPISGVSITEVK MATPISGVSITEVK mATPISGVSITEVK MATPISGVSITEVK RLELLAEVQR MATPISGVSITEVK MATPISGVSITEVK MATPISGVSITEVK MATPISGVSITEVK MATPISGVSITEVK LGLYVFcR MHMREEWDTLR GGKGRAAAAAASPGR
gi298706824	CBJ25788.1	11.52	38	5	709	73.5	8.51	conserved unknown protein	atpase family aaa domain-containing protein 1	0	0.576																										AVNRGMMTELmQLWDELScSGQDRQDR AVNRGMmTELMQLWDELScSGQDRQDR AVNRGMMTELmQLWDELScSGQDRQDR AVNRGmMTELMQLWDELScSGQDRQDR AVNRGmMTELMQLWDELScSGQDRQDR AVNRGMmTELMQLWDELScSGQDRQDR AVNRGMmTELMQLWDELScSGQDRQDR AVNRGmMTELMQLWDELScSGQDRQDR AVNRGmMTELMQLWDELScSGQDRQDR AVNRGMMTELmQLWDELScSGQDRQDR AVNRGMmTELMQLWDELScSGQDRQDR AVNRGmMTELMQLWDELScSGQDRQDR AVNRGmMTELMQLWDELScSGQDRQDR AVNRGMmTELMQLWDELScSGQDRQDR AVNRGmM…
gi298710765	CBJ32185.1	8.37	5	5	843	89.2	8.35	EF-hand, calcium binding motif	ef hand family protein	0	0.5495																										ILGSIGGGPFELLR TMAENEQLLR YGmGVTDAQVEKLFR FMRHLLLGNGPAGDRPAGGVGR TGAVTSDEFRQVLTANK AEEKMKAcVR
gi298706173	CBJ49101.1	16.43	8	5	636	70	6.24	outer dynein arm docking complex protein like	flagellar outer dynein arm-docking complex protein 1	0	0.6595																										SATGIEDIEELVR MMANVIELSNVNYEQRDNFQmEIAAVEQANRR ILHQRKMmGGVNAAmENEYMVQK ENNSLKTELAMEFR ILHQRKMmGGVNAAMENEYmVQK ILHQRKmMGGVNAAmENEYMVQK ILHQRKmMGGVNAAMENEYmVQK RAIDTVAEQTGmMKHK EKVRANAAAALMASGSEHGGGEDDLGmGR
gi298709869	CBJ26209.1	1.51	5	5	4280	440.4	4.58	hypothetical protein Esi_0027_0085	hypothetical protein Esi_0027_0085	0	1																										RLKQEAGER TDAPAVAVEAEGER AQREAATRR QQVSRNGSRNGSR EITAYEHEHAR DGmEFPPPAEPPLEDEAVIPAR SRPGSPARMEYQPR
gi299472414	CBN77602.1	4.81	5	5	1551	167.1	6.28	hypothetical protein Esi_0004_0241	hypothetical protein Esi_0004_0241	0	1																										VLGVNGKDLLR SSGASAPLSVLDVGRR RGLGLSINPDVGK VMGTFANLAYLcVAGGASTEWAGHLRESLK RSSGASAPLSVLDVGR
gi298712368	CBJ33154.1	8.32	5	5	937	99.3	6.92	conserved unknown protein	laminin subunit beta-2-like	0	0.56	yes	5																								NELKNQKTVR FGDLSGGRGSVDGSGGEK SRAEDTDGGVDYSREGR DNAScGSLTSGGATGGSSSREGSLAR GTGQDQGAGR
gi299115249	CBN74090.1	3.95	6	5	1621	167.2	6.6	hypothetical protein Esi_0012_0173	hypothetical protein Esi_0012_0173	0	1																										QAMEETRK SLVDGYR SLVDGYR IALDAAImLAPTDPTQR GSTAAAGGGGGGR cAEERDGGLSSPGSDVDGDSEAEALEQEAR
gi299470255	CBN79559.1	3.14	9	5	1769	186	5.96	expressed unknown protein	expressed unknown protein	0	0.69																										FKDETAGNLR GSEDVAVVSDAKEWR AEEGGERSGGR DTGTEEEEGHRRLVAGK GSEDVAVVSDAKEWR GSEDVAVVSDAKEWR GSEDVAVVSDAKEWR GSEDVAVVSDAKEWR TEGGDGARR GSEDVAVVSDAKEWR GSEDVAVVSDAKEWR
gi299472323	CBN77511.1	7.56	6	5	761	83.1	5.68	conserved unknown protein	conserved unknown protein	0	0.714																										ELMRLSEALEEVDALR KAADDLSAK EQQDPERKK ESLEAEK ELMRLSEALEEVDALR LESMLLAEKKK
gi299472683	CBN78335.1	5.35	7	5	1318	144.7	6.05	flagellar associated protein	tetratricopeptide repeat protein 21b	0	0.5855																										AIERFSASLKEDEGNEESmVGLAK AIERFSASLKEDEGNEESmVGLAK AIERFSASLKEDEGNEESmVGLAK AIERFSASLKEDEGNEESmVGLAK SGAGATGGTNKAGIR NPVFLLVKASVQKEEGK ESVDAAmTGFmSmLEDDK MDQHLR SLSYNKScSQAWETMGLVmEK SLSYNKScSQAWETmGLVMEK
gi298711129	CBJ32356.1	7.67	10	5	1187	126	8.29	conserved unknown protein	function unknown protein	0	0.52	yes	8																								LWFRcSLFAVGKGEETPSPGGGSEASAPGYPSGGSHR GRGSSAPADLENAAAGAGGRK RDDGAQALDmAARAVAVAR RDDGAQALDmAARAVAVAR GRGSSAPADLENAAAGAGGRK RDDGAQALDmAARAVAVAR RDDGAQALDmAARAVAVAR GRGSSAPADLENAAAGAGGRK GRGSSAPADLENAAAGAGGRK GRGSSAPADLENAAAGAGGRK GRGSSAPADLENAAAGAGGRK GRGSSAPADLENAAAGAGGRK DDLMQFVGPGTSNTmRQK GRGSSAPADLENAAAGAGGRK EAcAAHPDLVR YEPHSRLSGSSSHSK GRGSSAPADLENAAAGAGGRK mQANYKGENGR
gi298708067	CBJ30420.1	13.38	6	5	512	55	4.96	calcium-dependent protein kinase	calcium-dependent protein	0	0.5645																										RHGIEcDVWSVGVMTYALVGGR SSLVSLFLDDK ATKEmEGAPLSK MQQYmREVSSR mQQYMREVSSR GVSALcRDFIDK
gi299472620	CBN78272.1	5.93	5	5	1063	110.8	10.45	Zinc finger, C2H2 type family protein	protein fam164c-like	0	0.515																										DAAERALGRR YDKADGGVR QAARARR VGDASATQGAYDLTVLDNMDGAFPPK VGDASATQGAYDLTVLDNMDGAFPPK RPEWNSDTGAAASLGSPR
gi298714224	CBJ27360.1	9.58	6	5	705	76.1	9.14	hypothetical protein Esi_0067_0046	hypothetical protein Esi_0067_0046	0	0.686667																										TTFDEWDTLLFPNPPSR ESYFQEFcSVTEK LQTImTEAKEK MAPRKASAcATGGR KGARPSTANSK SSmSRRSSLAEEAMmR SSmSRRSSLAEEAmMR
gi298713751	CBJ33724.1	11.21	5	5	857	86.9	7.71	hypothetical protein Esi_0571_0007	hypothetical protein Esi_0571_0007	0	1																										SITSIGSGGTAGGR VASmAASTNK HSSTAVSDLDRSTSK DAVAAKVARR SSRNDNPSEDPAAAmVAYGGSGSLDVSGGQSSR
gi299117001	CBN73772.1	10.32	6	5	606	66.3	6.99	hypothetical protein Esi_0007_0016	hypothetical protein Esi_0007_0016	0	1																										AGVSAASAGK QMMEMQPVMEQR ALAEEEQWLATGSLGK RSGSDEPSR HAALQERmKELDQSALEHR HAALQERmKELDQSALEHR
gi299473161	CBN78737.1	10.25	5	5	761	77.4	6.89	expressed unknown protein	expressed unknown protein	0	0.74																										YFGFAQQVGLELGSLMPEELR DQAVWGVSLR GEAEDAEASGRLmLAIIDR SLPMTLDGRSKTHLK HTIAFVAcLVTmTLNLDQVGSFSLQVK
gi298713712	CBJ48903.1	9.24	10	5	931	95.2	9.74	hypothetical protein Esi_0057_0075	hypothetical protein Esi_0057_0075	0	1																										TASAWDATPmIKMFTGGKPGK TASAWDATPMIKmFTGGKPGK LVLEVcSEIEDSKK ALMSSPVGIDGPAR MDAFRSPAASPWPAGGGGGVGFR MDAFRSPAASPWPAGGGGGVGFR MDAFRSPAASPWPAGGGGGVGFR LcKVLPKVMETAIR MDAFRSPAASPWPAGGGGGVGFR MDAFRSPAASPWPAGGGGGVGFR MDAFRSPAASPWPAGGGGGVGFR
gi298711935	CBJ48622.1	6.71	5	5	1103	120.6	7.14	NB-ARC and TPR repeat-containing protein	nb-arc and tpr repeat-containing protein	0	0.555																										KSRAYSAALVGmDQLDSALGR LLEIEKK TIVEKmANK GAGRLQEAEGLLIRcLDIMEAALGR TPAKLANVPKGTPAR VATTLHSLGMcLR
gi298711651	CBJ32705.1	4.79	5	5	1399	141.8	8.68	serine/threonine kinase, putative	isoform cra_a	0	0.5625																										VGDTLANAR VGDTLANARSGR VEEAAAHPFLRLDK YAVPEGLSDIARDFLASMLSLDPRR ERFGWKGK cTRVmFYVPHATSATELFFRFSLADc DGGGLGWREDDGSGR
gi298710862	CBJ26371.1	12.91	5	5	767	83.2	7.93	similar to Probable phospholipid-transporting ATPase ID (ATPase class I type 8B member 2)	phospholipid-transporting atpase 3	0	0.53	yes	2																								cSIRGQmFGLGTTEIGLNYR RTPHVNFIDPEFSRVVENK GALVEcDLPNQKLEHFDGALVLQGGER SSELNEDLGRVK HQADAQENSRTVTR
gi298709537	CBJ48552.1	4.71	6	5	2197	220.8	5.59	conserved unknown protein	protein kinase	0	0.5655																										AARGmLYLHTHNPAIVHRDLK QVEAVmGTLQELKR AARGmLYLHTHNPAIVHRDLK SDGDSHPATRGIWLSEGR GQLPTGRGGGGSGSVGGGGGGGGGGGGGSGLSYQHMWPR FRTANVSAVASGAARSGHDEAAADR MAFSIGGR
gi299469822	CBN76676.1	6.25	6	5	873	99.7	4.87	conserved unknown protein	function unknown protein	0	0.6305	yes	1																								LWILTDDMK NFDLSNDLVR EmSAVVSENK EANKNFAYNYRELK EANKNFAYNYRELK LEISGMR MFRLNESLEMNTK
gi299472507	CBN77292.1	5.66	5	5	734	81.6	5.91	conserved unknown protein	coiled-coil domain-containing protein 135	0	0.48																										TLYHYPEGDVTR DRLLERANIINSR mHAWVLVR mPQYTKKPHHK QKETDGK
gi299470743	CBN79789.1	3.04	5	5	1925	199.8	6.86	conserved unknown protein	inactive ubiquitin carboxyl-terminal hydrolase 54	0	0.439																										QLDLTLEARREQLR QLDLTLEAR NAGcSLSRR DARAASGNGmFSPSAEQAEDmAKQR LKIEDIKcSTcR ARGcEVAPR
gi298712216	CBJ33084.1	4.26	19	5	1701	187.9	6.42	Hypothetical leucine rich repeat calcium binding protein	hypothetical leucine rich repeat calcium binding protein	0	0.4985																										HDLYALDLSENK HDLYALDLSENK HDLYALDLSENK HDLYALDLSENK HDLYALDLSENK HDLYALDLSENK HDLYALDLSENK HDLYALDLSENK HDLYALDLSENK HDLYALDLSENK HDLYALDLSENK HDLYALDLSENK mSKALENNDRQITSR HDLYALDLSENK HDLYALDLSENK HDLYALDLSENK YQLDKLAFTKHPEPR HDLYALDLSENK HDLYALDLSENK HDLYALDLSENK QAGSDFFLYGAHEKSD
gi298711405	CBJ32547.1	5.78	5	5	1021	101.4	6.16	hypothetical protein Esi_0346_0017	hypothetical protein Esi_0346_0017	0	1																										DEVEAcRAR KWEDAVSYVR GGSGRQSGEDAADR AGLDDLLR AAAAAGISAMAAAASAKcNGIGGGGGVPGK
gi298707177	CBJ29950.1	11.39	5	5	531	56.6	9.42	conserved unknown protein	function unknown protein	0	0.564375																										QQSASSASLASEKESLR QLNEQVAK DDANAIKAK AAASRDLEAKLAAER EEKMRLAR
gi299472959	CBN77360.1	2.97	6	5	2597	271	8.02	expressed unknown protein	expressed unknown protein	0	1																										EIScVANHPDGGQGGGGAGcNGANRVEGLR GGAAAAAARKMR MLLGAGSRRR KASRcEVSR RGGDDPcRK SSVGDHVGDGLSTGVRGRSR SSVGDHVGDGLSTGVRGRSR
gi299472489	CBN77274.1	2.44	6	5	3716	385	6.6	phosphatidylinositol kinase (PIK-5)	serine-protein kinase atm	0	0.5845																										GGGGGGSGGGGGGEAGVLGGGRVKR GGGGGGSGGGGGGEAGVLGGGRVKR LSAGRSENER GTLTAEPSPATIAAAPGR LVEGTAGEGGASSSTSSScRTAGSLLANLSHLRAALR LARmNTARmAAR
gi299470663	CBN78603.1	5.54	8	5	1056	111.8	7.06	conserved unknown protein	psp1 family protein	0	0.761																										TRIWMQQVKDK MSSSTQRLQPTFSSRSGR TRIWMQQVKDK TRIWMQQVKDK TRIWMQQVKDK TRIWMQQVKDK TRIWMQQVKDK SQEEANILR EEEAQQEAcPVK HQRccAVFDEVDEGR ASSSMHAAHLEDR
gi299115625	CBN75826.1	14.08	5	5	643	68.9	6.18	Rieske (2Fe-2S) domain protein	rieske (2fe-2s) domain protein	0	0.5925																										VPNLWLAVAHSSDVKAGEVK VTFPHLQRFSPTGWmETTYLNQGIRIAR ERRAAETGTGTGK VYFGSNSLKTIEATAVPRADGETTLHWK DEASRLmVGFR MDAGEDFDQLDGIPGMPETIGIGPILRSNATKSIDIR
gi298706507	CBJ29477.1	14.24	8	5	632	67	9.39	conserved unknown protein	ankyrin repeat domain-containing protein 13c	0	0.5955																										EKYIAGVGTGGEGGGGGGGGRQNmDR LPRVPPAmPLSGSRGAGVGR LEWQTNREVDK LDGGQQVQAVmAGWK LEWQTNREVDK LEWQTNREVDK LEWQTNREVDK EKYIAGVGTGGEGGGGGGGGRQNmDR SPPGSmSNLRAAAEQQQQQQQATGSRLPR
gi299470080	CBN79257.1	9.85	6	5	853	92.9	6.7	kinesin-like protein	kinesin motor domain-containing protein	0	100
gi298715444	CBJ34040.1	11.11	4	4	402	44.9	5.14	conserved unknown protein	camp-dependent protein kinase regulatory subunit	0	0.6																										LLIEKPDNPIGFIVEYLAK HLDSQQTDQVK NINSLFIQIVER RYPDETR RVmGSmETILK
gi299470074	CBN79251.1	57.02	4	4	380	42.7	6.62	conserved unknown protein	ubiquitin c	0	0.904																										TITLDVEPSDTIDGVK ESTLHLVLR IQDKEGIPPDQQR TLSDYNIQK TITLDVEPSDTIDGVKQK
gi298710074	CBJ31790.1	5.92	4	4	625	69.1	6.9	Protofilament ribbon protein of flagellar microtubules	protofilament ribbon protein of flagellar microtubules	0	0.5275																										TASTSLGIR NSGIIGGNFLSR FIITYFK TASTSLGIR TGVPEDEGRR DPVPVmVKRGR
gi299470712	CBN79758.1	21.9	4	4	172	18.2	7.77	peptidyl-prolyl cis-trans isomerase, cyclophilin-type	cyclophilin-like protein	2.89482e-111	0.8705																										FADENFQLK AVEAVGSSSGK GNGTGGESIYGEK cLcTGEK
gi298713815	CBJ27187.1	7.26	4	4	767	85.6	6.24	conserved unknown protein	calcium calmodulin-dependent 3 -cyclic nucleotide phosphodiesterase 1a	0	0.548																										DLDPLAVVYNDASVLENFHAAEGFK TGMFVVR IMELTTVEER SGESSVDNDNK mNSHPQELRDLVSEHK
gi299115417	CBN75582.1	12.6	4	4	352	42.1	5.4	conserved unknown protein	rib43a-like with coiled-coils protein 2-like	0	0.524																										TIGLDTDALDQQMR AWSTQLANER EQQLDLQQR ALERAEEmAR EQREKDmIHAGVDFDK
gi298713061	CBJ48836.1	2.75	4	4	1697	181.6	5.92	eIF-2alpha kinase GCN2 similar to Eukaryotic translation initiation factor 2-alpha kinase 4 (GCN2-li	eukaryotic translation initiation factor 2 alpha kinase 4	0	0.4835																										RFPAGGGGGEGGSGAVK LASmLVTPR VMSVMEK KAVKVmSVmEK LEVLVQR
gi298706354	CBJ29363.1	4.96	4	4	908	106	6.92	flagellar associated protein	flagellar associated protein	0	0.6905																										DFQEVLSELVGDK LYKEmK KMEREK cGDLmRDLAIAR cRELNGEIVNNAAK
gi298714513	CBJ27535.1	6.46	4	4	1269	134.5	6.29	possible vacuolar protein	possible vacuolar protein	0	0.4665																										GSVPVLYGLSSDEDLTTLHYVAcTLVR LGVSEIEASIAmAFLLMSGNSKcR EGAVEAVLR SALVSLFGLLR LVEASGSAEAPADSR ALcNLAcHHGSEK
gi298710230	CBJ26305.1	7.28	4	4	586	64.1	4.97	protein phosphatase 2A regulatory subunit	serine threonine-protein phosphatase 2a 65 kda regulatory subunit a beta isoform-like	0	0.636																										LLAVEQAGK HISEHDQR VGASEGLQRLcKVcGADWLQEK AVMVSVPLLTER IALSNAcmKLAPK DSVNEVRVGASEGLQR
gi299473614	CBN78008.1	5.88	4	4	630	66.4	9.2	hypothetical protein Esi_0082_0014	hypothetical protein Esi_0082_0014	0	1																										WGGcVAWGGATGK MQPHDASTTRSR GAAEEDGcTRIEPSSR GAAEEDGcTR GAAEEDGcTR
gi298712503	CBJ26771.1	14.84	5	4	283	31.7	5.02	conserved unknown protein	radial spoke head protein 9 homolog	2.07714e-178	0.5225																										SGLQVSMMQR NPESIEAIAALTK TLSVSERSGLQVSmmQRK DLRSYFHFR TLSVSERSGLQVSmmQRK NPESIEAIAALTK TLSVSERSGLQVSmmQRK
gi299469717	CBN76571.1	10.1	6	4	604	62.6	7.59	metallo-beta-lactamase superfamily protein	metallo-beta-lactamase	0	0.531																										GGGGGRSAFDER QLDGREIGALR HRVDALGFALmRLK LRALSQGPPAKYYMGAELASGmEK LRALSQGPPAKYYmGAELASGMEK LRALSQGPPAKYYMGAELASGmEK
gi298711411	CBJ32553.1	2.53	4	4	1999	212.9	5.59	hypothetical protein Esi_0346_0039	hypothetical protein Esi_0346_0039	0	1																										STAAEERVADLNER EPAEAPVAmAEQK ESPGGGFAGR EPGIEELGGPAMR EAEAVQEK
gi298711139	CBJ32365.1	5.17	11	4	1284	135	9.07	conserved unknown protein	kinesin family member 3c	0	0.68																										NVEQVmELLRQGDRNR NVEQVmELLRQGDRNR NVEQVmELLRQGDRNR NVEQVmELLRQGDRNR NVEQVmELLRQGDRNR NVEQVmELLRQGDRNR NVEQVmELLRQGDRNR NVEQVmELLRQGDRNR NVEQVmELLRQGDRNR NVEQVmELLRQGDRNR NVEQVmELLRQGDRNR NVEQVmELLRQGDRNR NVEQVmELLRQGDRNR NVEQVmELLRQGDRNR RNSAVNVVSSVLKMEAVTR RNSAVNVVSSVLKMEAVTR LRAHVGESDSGGVHDAER
gi298706680	CBJ29609.1	6.15	6	4	1220	132.7	7.33	Trehalose 6-phosphate synthase, family GT20 / Trehalose 6-phosphate phosphatase	trehalose-6-phosphate synthase	0	0.5455																										TYVNDIDEVLEmLRGLVK YVFLGIDK LVTDPSSYPVWSSGPVPVPLNK QQEEQLEKEVAEAEARSGGMGSQSHSAGR LVTDPSSYPVWSSGPVPVPLNK QQEEQLEKEVAEAEARSGGMGSQSHSAGR QQEEQLEKEVAEAEARSGGMGSQSHSAGR
gi298712711	CBJ48736.1	5.05	4	4	1030	109.3	4.91	conserved unknown protein	set domain containing protein	0	0.46																										YLWAAAIVDSR KVEAGLIGNGmR TREEGDTVAGR SSAETGTGK AmLPFFALPAPDVcK VLEAFPMGRPmFcISLR YGKNVEGGGDMGGDGGR
gi299473229	CBN78805.1	9.73	4	4	617	66.3	5.12	conserved unknown protein	nuclear segregation protein	0	0.497																										KIPYESEIVLcDTLVSYLETTFMNVK KTAAQFMSQEEMVKGAK APDINDEEFPGLPGMASKPK GQGDEmGEAR DEIRSHLDTmQADSAR ALEEEEAK GQGDEmGEAR
gi299471040	CBN78900.1	7.8	13	4	748	84.2	4.69	conserved unknown protein	annexin a6 isoform 1	0	0.519																										NDESLVDKLNSEIR AQVAcIR DLSGDLKTFmVYTQmETQEFDALLMK DLSGDLKTFmVYTQmETQEFDALLMK DLSGDLKTFmVYTQmETQEFDALLMK DLSGDLKTFmVYTQmETQEFDALLMK DLSGDLKTFmVYTQmETQEFDALLMK DLSGDLKTFmVYTQmETQEFDALLMK DLSGDLKTFmVYTQmETQEFDALLMK GRLSIISERFTEK DLSGDLKTFmVYTQMETQEFDALLmK DLSGDLKTFmVYTQmETQEFDALLMK DLSGDLKTFmVYTQmETQEFDALLMK DLSGDLKTFmVYTQmETQEFDALLMK DLSGDLKTFmVYTQmETQEFDALLMK DLSGDLKTFmVYTQmETQEFDALLMK
gi298704811	CBJ48959.1	4.41	4	4	1263	135.3	7.59	conserved unknown protein	nucleolar protein 6	0	0.4565																										DAAGGSAmYVVAPYAR VEALQAASPLLR MATAEQQTFDVR IGGERELSLLGK VNARMAALSmFQVVLK GGGEVATmSVLNVVEVLSEMKVVGGDMIEAVHVS
gi299472454	CBN79728.1	8.33	6	4	988	101.4	9.58	RecName: Full=Mitogen-activated protein kinase kinase kinase A; AltName: Full=MAPK/ERK kinase 1; Short=MEK kinase 1; Short=MEKK 1; AltName: Full=MAPK/ERK kinase A; Short=MEK kinase A; Short=MEKK A; Sh	mitogen-activated protein kinase kinase kinase anp1-like	0	0.63																										EITLETK VSAVRGGDGTGSSGSGEDNDIPLEAMGR VSAVRGGDGTGSSGSGEDNDIPLEAMGR GGSGSSESGGRTDSEASVSR VSAVRGGDGTGSSGSGEDNDIPLEAMGR LADFGcALVLKDDNGDGVEmSMK LADFGcALVLKDDNGDGVEMSmK GGSGSSESGGRTDSEASVSR
gi299470868	CBN78817.1	7.93	5	4	920	94.9	10.95	hypothetical protein Esi_0145_0025	hypothetical protein Esi_0145_0025	1.55639e-171	0.913333	yes	3																								GGGVASFSEHTGDLHVVNSRGK AWTSTARPRTmATMPR LTSMAARR LTVTDDGAVYSGTDGK LTVTDDGAVYSGTDGK LQAVmRGRAGR LTVTDDGAVYSGTDGK
gi299469723	CBN76577.1	4.09	5	4	1753	189.8	6.61	conserved unknown protein	voltagegated ion channel superfamily	0	0.5605	yes	6																								RKGmEVVPEELDSEDTNR RKGmEVVPEELDSEDTNR AGGGGEGSGGGGGGTGGGGAQRVVPLSTAR LAAQEmGFVLHGVcEETSADTGETIQNYR SRRQSLmAVAQAVR STKLIRmIR STKmLRILR
gi299117152	CBN75116.1	5.6	4	4	1250	125.9	8.12	dynein intermediate chain family	wd repeat domain 78	0	0.6495																										AEVGGEETAVQR AASGTTPAFFSSPPPSGPNLAAIATAARR SGGGGGGVSTNAVNPNASR AASGTTPAFFSSPPPSGPNLAAIATAAR HPTLLAVGMYDGTIAIYDTAR
gi298713424	CBJ33628.1	5.41	5	4	1128	123.8	6.15	conserved unknown protein	abc transporter	0	0.4965	yes	10																								ETFEVAAR EILTYMK ALVFRDITLK GATWQELYYNSEFNIDIPNSTVRTDK EEGEGmVPScHSAENAQEKALVFR
gi298712587	CBJ33287.1	6.25	4	4	584	65.6	8.4	conserved unknown protein	neurofilament triplet l	0	0.6085																										YNEAQSIR YSGPGEGHRR EDSPLTR TDYEEER
gi298705202	CBJ28633.1	2.05	5	4	2420	254.5	6.28	SNF2 helicase	e3 ubiquitin-protein ligase shprh	0	0.54																										IGGVEWWEVALGYMESTR LGGGSAEGR IGGVEWWEVALGYMESTR GGQTRPTTIHR QAAAHELDSSR GGERGGLGESEAGGASSSGRR cGSTLIIcPHK
gi298705135	CBJ28578.1	3.54	4	4	1740	188.1	4.89	TiTiN family member (ttn-1)	in family member (ttn-1)	0	0.616																										ENAASSREALR EQLEADLAKQGEGFSEER EESEALK DFIDETDK AmLPEWmSERVDVR
gi299470869	CBN78818.1	4.96	4	4	1442	151.6	5.59	conserved unknown protein	condensin-2 complex subunit g2	0	0.556																										mHGLKGALLLLDFEDESSDSLR RFSGQDEcRAAFmR mHGLKGALLLLDFEDESSDSLR TTTATATDEEAGSGEIADGK
gi299470465	CBN78457.1	4.08	4	4	1609	164.3	5.47	hypothetical protein Esi_0121_0054	hypothetical protein Esi_0121_0054	0	1																										AcVVSGDEEEERGSVLDLAR mSVKDAImSLIDGRIR LRLRGGGGELR QDLEAARAcVVSGDEEEERGSVLDLAR TSNGGVSESAAAAAAAAAAATASGcLLR SESDGRAQVSTLRMGNNR
gi299470256	CBN79560.1	5.44	4	4	975	98.7	8.1	conserved unknown protein	n/a	0	0.7																										LAGRLLLADER GVIDLDPYTNIGVDQR GGSVGAGGGRGGGGGR KAmASKADR WSAVGAGARWK
gi299470148	CBN78176.1	4.17	4	4	1283	139.6	5.34	Glutamate synthase (NADH/NADPH-dependent), C-terminal part	glutamate synthase	0	0.749																										DALESKTPVSLK LEINPDVLHYKSR VMSKmGISTLQSYK VLAEMAEAK VDTPEDMEELRGFIQAHLDHTK
gi299117116	CBN73887.1	2.89	4	4	1766	177.5	7.08	conserved unknown protein	ring zinc finger-containing protein	0	0.541																										GAGTSANLLPVASR GSLLSGVAGDAKGSAPGGGGGGELGLTGALR VSPGGSRASR VSPGGSRASR GGNREmISPLQVKR FIAVGTSR
gi298711826	CBJ32852.1	4.32	5	4	1376	150.2	6.57	NB-ARC and TPR repeat-containing protein-likely pseudogene	nb-arc and tpr repeat-containing protein	0	0.6775																										AGAWEELAKELENVAKK VQALQEK VHGPDHPDVAR VHGPDHPDVAR VHGPDHPDVAR
gi298711187	CBJ32409.1	3.31	6	4	2223	216.1	9.39	hypothetical protein Esi_0337_0010	hypothetical protein Esi_0337_0010	0	1																										APPAAPAVAADAKK AAATVDVRSAASVLPAAAAALAR MVASRDNLR APAYPPMSAAAPSVFGADAAK APPAAPAVAADAKK APPAAPAVAADAKK APPAAPAVAADAKK APPAAPAVAADAKK
gi298709859	CBJ26199.1	6.16	4	4	1136	124.5	5.47	LRR-GTPase of the ROCO family	lrr-gtpase of the roco family	0	0.7285																										mTQAGVKLLEPSGcPQcSPDTR EDATRTAAR GTQMVLPRSWDIALTVLEALER SRGSLKcPQHGDAmLLVNK DGDGYVDFRDNmQR
gi298708163	CBJ30503.1	6.79	4	4	1039	107.7	5.25	conserved unknown protein	cold shock domain-containing protein e1-like	0	0.598																										EMVGAAGPLRNGDEVDLmLPTPLQRVALQTK EKEKENVIATEAAVDGAETVIK APTFPHRQSFGGGREGGGGGGGmQPGSAR LVSFGGER RAVEVVLVRTNR
gi298705383	CBJ28673.1	6.24	4	4	778	80.2	5.34	conserved unknown protein	conserved unknown protein	3.1267e-180	0.555																										AGLLQRKmGSSSEQR EKFMVAPGDcGAAGAVWWTRR mLEQVQHVSGNK ATKEGmGSR mLEQVQHVSGNK
gi298713388	CBJ33599.1	8.45	5	4	734	82.4	8.25	conserved unknown protein	conserved unknown protein	0	0.53																										RLTALEDGDVSALAGKR RLTALEDGDVSALAGKR TQDHAWVQHVmFKILTEHVPALmRK FHFGWLASR RFPSSAATLGAcPSAMEGQPGR
gi298711627	CBJ32683.1	6.2	5	4	864	97.1	7.84	conserved unknown protein	conserved unknown protein	0	0.5305																										RLTALEDGDVSALAGKR RLTALEDGDVSALAGKR FPASTATLGAcPSAMEGQLGR EMELMFTRMR RRSHDDEDTPK WSmFTSVDAEGR
gi298704764	CBJ28360.1	5.83	4	4	978	101.6	9.57	conserved unknown protein	conserved tpr domain protein	0	0.5495																										LRYGLYGGPGNASGAVSR AASIEAMVRLAR GVPQEGSNPLFNAGDVRR SRGASLEATPR TFVQSAR
gi298714381	CBJ27438.1	6.39	4	4	728	79	8.97	Hypothetical leucine rich repeat calmodulin binding protein	hypothetical leucine rich repeat calmodulin binding protein	0	0.4875																										cPGITALNLR WERGEQRK TRVPKLGGDGVR TRVPKLGGDGVR
gi299472278	CBN77248.1	3.05	4	4	1560	169.3	5.21	conserved unknown protein	condensin complex subunit 1	0	0.548																										QTAGLTKQPAKGK QGIPDRSFmSLFLR ANAIMVLTHLILNDMVKVK LGAELAREVGRMEMPDINSK SFATLEmK mEmPDINSK
gi299472366	CBN77554.1	3.12	4	4	1510	158.4	5.74	hypothetical protein (Partial)	hypothetical protein (Partial)	0	1																										EAGGEVGVGLVK AEEAASRR SASLVAEDLSLR EGRMTEGAITLTVASIRAEGSDAGVDK
gi299470739	CBN79785.1	7.88	4	4	552	58.5	5.9	GJ12915	protein phosphatase	0	0.507																										AAAKAAQAAAADGLGGGGGHSTGGKTGLWK TIGDLDcKR VLSMGGTIVNNR VLSmGGTIVNNRVAGcLmPTR
gi299470534	CBN78522.1	25.78	5	4	128	14.2	9.64	expressed unknown protein	function unknown protein	0	0																										EIVEMMEER EIVEmMEER FVEYPPESK LPSGKEIVEMMEER EIVEMmEER TAATRSGMDAHLAAAGAVTR
gi299117423	CBN73926.1	3.66	5	4	1395	149.8	8.25	hypothetical protein Esi_0009_0056	hypothetical protein Esi_0009_0056	0	1																										EPATSQRRSTAR VMVASAVSAGNDNINSR RALENVATK VMVASAVSAGNDNINSR QKEEEEAAAR DADSSTKDFcDVLRR
gi299115692	CBN74257.1	11.91	6	4	672	70.5	9.64	EsV-1-7	n/a	0	0.61																										SSTAANALRTAMTATSQQcTEEADVHYMGR SSTAANALRTAMTATSQQcTEEADVHYMGR LSNGSGGGGGSRGGK EGADESPRAADDGGGGSGGRR DPGPPRATVNGDR RSPRGHEGEGESGGK
gi299115582	CBN75785.1	5.77	4	4	980	104.6	7.52	flagellar protofilament ribbon protein	flagellar protofilament ribbon protein	0	0.498571																										QKVFKGGSTPSLSVDR TGTLRERFFK TPGDAADLWTTcRLLK TLRFLAKATQDTK
gi298709758	CBJ31560.1	6.74	6	4	994	104	9.04	conserved unknown protein	bis(5 -nucleosyl)- symmetrical	0	0.6																										EEGRETAASTGTVGEDGGGPYRVGGR EEGRETAASTGTVGEDGGGPYRVGGR DDSARMRR GTGQQHSLGAAR AAGTDDRARR GPSAHHQIAMSLGEDDGLWLK
gi298705849	CBJ28994.1	3.67	4	4	1010	105.5	4.28	expressed unknown protein	expressed unknown protein	0	1																										LVERETEK EcVAAEARMHAAAKAFEK ETEKmLSR STPSAEEDGDAIGER
gi299470306	CBN78356.1	5.84	5	4	1036	107.5	4.82	hypothetical protein Esi_0112_0024	n/a	0	0.786667																										LLLESAGAVGK TPGQVAPGAAcRTRGSTTVTAAER ATDGSDAVK TPGQVAPGAAcRTRGSTTVTAAER EDmFTIVEAADERWSSSDDDEEEAPLTR QAcFVVWHGGALER
gi298708118	CBJ30460.1	2.5	4	4	2178	235.1	6.42	conserved unknown protein	tpr repeat-containing protein ddb_g0287407-like	0	0.5495																										ANGmEKASTADQAILSR TLASVGSAPLSTNNGTGGR EMSQLVQK QADDHGGALILAK AEGTEGEAESR
gi299472254	CBN77224.1	8.72	4	4	637	67.8	4.72	conserved unknown protein	ion channel	0	0.7055																										FGDFLGELERK KTEGQEQQR ASSSSGVEVISVAAAATTADDDKPRGADSR EPAADEGRTAK
gi299471924	CBN79605.1	8.03	5	4	1177	131.2	8	conserved unknown protein	voltagegated ion channel superfamily	0	0.57	yes	7																								SGSTAALPRVGSIGPcPGRGGGGSAGGGEAAK SGSTAALPRVGSIGPcPGRGGGGSAGGGEAAK SGSTAALPRVGSIGPcPGRGGGGSAGGGEAAK MAYVNGHVLVTSPSLmASHYLR KHFDHVYRNTSVFR EKGGPKDGAGGGGFAINPLQTLSAmAAWVATADGGK
gi299116103	CBN74519.1	7.49	5	4	828	89.5	9.99	expressed unknown protein	expressed unknown protein	0	1																										DAFPEKEDRR YmMVGTKDAVPAGAK AREDGQMGGGR YMmVGTKDAVPAGAK MAARGGRGGWAGDK
gi299115422	CBN75587.1	8.15	8	4	632	66.1	5.21	conserved unknown protein	conserved unknown protein	0	0.725																										QmLGGEGSSGLGRFPLR QmLGGEGSSGLGRFPLR QmLGGEGSSGLGRFPLR QmLGGEGSSGLGRFPLR QmLGGEGSSGLGRFPLR QmLGGEGSSGLGRFPLR QmLGGEGSSGLGRFPLR FPLRYIFVIDHADR DGcVNGVSRGGEDSGVK
gi298710713	CBJ32137.1	5	4	4	1010	111.3	5.35	conserved unknown protein	rasgap-activating-like protein 1	0	0.4615																										TILESKTNEEDQLAK GGNTVKALVPDDEESAVGDPGLLSER NILQRIWGQR GLDVAVSHmSLGER RVLNVKR
gi298710243	CBJ26318.1	2.42	4	4	1986	219.5	5.83	Voltage Gated Calcium/Sodium Channel subunit alpha	voltage-gated ion channel superfamily	0	0.603	yes	21																								GKEDDKEAEER LVVSmLR TQELEPAGSNMTSINEGR DPESATAKYLK
gi298708788	CBJ30748.1	14.71	7	4	408	43.9	9.11	conserved unknown protein	wd repeat-containing protein 76-like	0	0.4725																										IEGDVSmEATNSTLDGTVR mKENAMmmASLGLGGAKDNMR mKENAmMmASLGLGGAKDNMR MKENAmmmASLGLGGAKDNMR mKENAmmMASLGLGGAKDNMR IEGDVSMEATNSTLDGTVRLRQMMGGLVGR IEGDVSMEATNSTLDGTVRLRQmMGGLVGR AVNSDAAQR
gi298708263	CBJ48326.1	10.29	5	4	549	60.3	7.83	cryptochrome 3	probable bacterial cryptochrome	0	0.638																										QTWRDDAGLLAAWKEGR QTWRDDAGLLAAWKEGR QTWRDDAGLLAAWKEGR FMmPKEGKGTTGR ELKASGFMSNR
gi298707694	CBJ26011.1	3.67	4	4	1173	125.6	6.99	conserved unknown protein	conserved unknown protein	0	0.4985																										RQQQQQQQQQR GSLSTPTTPSFSKAQDEAGSKDAER YEELWDLK RELQRWLQEVGTK
gi298705684	CBJ28922.1	6.95	4	4	669	71.5	9.04	Hypothetical protein in ptb 5\'region (ORF1)	function unknown protein	0	0.6575																										EALEAFERRmPGFVcDEALLHGVETR mPGFVcDEALLHGVETR VGQSVAmQVLSAAMSAR DEGmLADTDVVVARK MPGFVcDEALLHGVETRTSSPVQVER
gi299470293	CBN78343.1	15.22	4	4	276	31.4	9.6	hypothetical protein Esi_0112_0002	hypothetical protein Esi_0112_0002	0	0.77																										DFGGTLNLFATAY AFSSSFAR QLARAMK RLSMSMVLPEGPVR
gi298708635	CBJ26122.1	13.65	4	4	674	76	6.55	conserved unknown protein	upf0704 protein c6orf165 homolog	0	0.5625																										LSIESTPEFMQLPLEYQGFcSWTIVK mLQGGKNGNGK DADEEGRRGDTSDHIEEQPVPGGQEPAIVR EmQRTIATMRPKDGADFDALTALHR
gi299470226	CBN79530.1	15.43	4	4	512	56.4	5.27	flagellar associated protein	flagellar associated protein	0	0.5805																										LLGENSVLTTLNLADNQIHAEGGR NSSLTSIDLRmNDVSADLEDLEKIEK LPAHDATGGFNVGYRK VGALYVFDENYWK
gi298711812	CBJ32839.1	8.345	4	4	659	71.9	5.1	Molecular chaperones HSP70/HSC70, HSP70 superfamily	heat shock protein 70	0	100																										NVLIFDLGGGTFDVSVLTIEEGIFEVK IINEPTAAAIAYGLDK ARFEDMNQDYFQK ISETIAWLDANQNAEKEEYEEK DAGAISGLNVMR
gi299115750	CBN74315.1	2.35	4	4	1662	179	5.9	Intraflagellar transport protein 140 puative	intraflagellar transport protein 140 homolog	0	100																										LSVSASSVR GGVIcVWKADAR GAVTTDLAWcK LYREcGR
gi299471800	CBN79468.1	8.97	36	3	468	53	5.35	Calcium-dependent protein kinase, isoform 2 (CDPK 2) Protein kinase domain containing protein	calcium-dependent protein	0	0.631																										VmSGDAAAQTLRDSALR VmSGDAAAQTLRDSALR VmSGDAAAQTLRDSALR VmSGDAAAQTLRDSALR VmSGDAAAQTLRDSALR VmSGDAAAQTLRDSALR VmSGDAAAQTLRDSALR VmSGDAAAQTLRDSALR VmSGDAAAQTLRDSALR VmSGDAAAQTLRDSALR VmSGDAAAQTLRDSALR VmSGDAAAQTLRDSALR VmSGDAAAQTLRDSALR VmSGDAAAQTLRDSALR VmSGDAAAQTLRDSALR VmSGDAAAQTLRDSALR VmSGDAAAQTLRDSALR VmSGDAAAQTLRDSALR VmSGDAAAQTLRDSALR VmSGDAAAQTLRDSALR VmSGDAAAQTLRDSALR KAFDHFDLQGTGSINK VmSG…
gi298709000	CBJ30951.1	8.16	18	3	523	55	9.45	conserved unknown protein	function unknown protein	0	0.554286																										DTASAEAASTTRREVGR DTASAEAASTTRREVGR DTASAEAASTTRREVGR DTASAEAASTTRREVGR DTASAEAASTTRREVGR DTASAEAASTTRREVGR DTASAEAASTTRREVGR DTASAEAASTTRREVGR DTASAEAASTTRREVGR DTASAEAASTTRREVGR DTASAEAASTTRREVGR DTASAEAASTTRREVGR DTASAEAASTTRREVGR DTASAEAASTTRREVGR DTASAEAASTTRREVGR DTASAEAASTTRREVGR DTASAEAASTTRREVGR DTASAEAASTTRREVGR DTASAEAASTTRREVGR DTASAEAASTTRREVGR DTASAEAASTTRREVGR GSAMLREHcDESLLER GGLR…
gi298704735	CBJ28331.1	6.19	6	3	727	80.2	4.46	Tubular mastigoneme-related protein	tubular mastigoneme-related protein	0	0.5645																										McPYGIDPLFIDDENTAR AScPNDcSGHGVcK VcPFGLAHVDSPK VcPFGLAHVDSPK AScPNDcSGHGVcK McPYGIDPLFIDDENTAR
gi298708571	CBJ30656.1	3.29	14	3	1451	153.3	5.19	conserved unknown protein	rab6 gtpase activating gapcena (rabgap1 protein)	0	0.5845																										SAATETVADAASERRSR SAATETVADAASERRSR SAATETVADAASERRSR SAATETVADAASERRSR SAATETVADAASERRSR SAATETVADAASERRSR SAATETVADAASERRSR SAATETVADAASERRSR SAATETVADAASERRSR SAATETVADAASERRSR SAATETVADAASERRSR WMRcVRLADGVPENR SAATETVADAASERRSR SAATETVADAASERRSR SAATETVADAASERRSR SAATETVADAASERRSR SSGAVAEDLGSDGRR SAATETVADAASERRSR
gi298713087	CBJ48862.1	18.79	3	3	236	26.3	4.7	n/a	14-3-3-like protein	4.60151e-165	0.8345																										ALQAYQSATTLTNQDMAPTHPIR VISSIEQK DSTLIMQLLR NLLSVAYK
gi299470637	CBN78578.1	14.07	3	3	282	30.6	6.16	UDP-glucose 4-epimerase	udp-glucose 4-epimerase	0	0.645																										DYIHVVDLASGHLK VGDLAcVYADPAK AQFGLDEMMR DMWAWQSK
gi299117282	CBN75242.1	9.06	3	3	379	41	5.86	flagellar radial spoke protein 16	dnaj heat shock protein	0	0.656																										AIYDQYGAEGLR KPEGYTYK AASDAEIKK SNTTEASK
gi298708397	CBJ48460.1	8.22	3	3	657	72.2	4.83	Molecular chaperones GRP78/BiP/KAR2, HSP70 superfamily	heat shock protein chaperone	0	0.8795																										IINEPTAAAIAYGLDK EIAEAFLGKDVANAVVTVPAYFNDAQRQATK mKEIAEAFLGK TLGPVQKVmK
gi298711450	CBJ32589.1	7.61	3	3	504	54.8	6.47	pyruvate kinase	pyruvate kinase	0	0.7595																										IIcTLGPAcWSVETLGALVDAGMNVAR TDAIMVAR TDAIMVAR GDmGmEIPPEK VVcIHGmK
gi298705057	CBJ28516.1	2.65	25	3	1282	125	6.25	Ankyrin	ankyrin repeat transient receptor potential channel	0	0.578333																										AEAKEVDLLR AEAKEVDLLR AEAKEVDLLR AEAKEVDLLR AEAKEVDLLR AEAKEVDLLR AEAKEVDLLR AEAKEVDLLR AEAKEVDLLR AEAKEVDLLR AEAKEVDLLR AEAKEVDLLR AEAKEVDLLR AEAKEVDLLR AEAKEVDLLR AEAKEVDLLR AEAKEVDLLR AEAKEVDLLR AEAKEVDLLR AEAKEVDLLR AEAKEVDLLR AEAKEVDLLR RGRSmVTGGR AEAKEVDLLR AEAKEVDLLR AVYARHGVTK AEAKEVDLLR SESGGGSSRKR AEAKEVDLLR
gi299117025	CBN73796.1	4.5	3	3	1237	129.9	5.3	conserved unknown protein (Partial)	abc transporter b family protein	0	0.6005	yes	11																								AIIKDPAILLLDEATSALDSESEK AGIKAGLNK AAKSAFAHDFVTSFTDGYETDVGEKSALLSGGQK FKGIKFAYPQRPDAQVYGSEK
gi299117480	CBN73983.1	16.73	5	3	265	29.8	9.28	putative initiation factor eIF3 g subunit	eukaryotic translation initiation factor 3 p42	2.83653e-179	0.7665																										FGLAAQGEDNPSSPIKWR EAALPEEEGLLRFSR FGLAAQGEDNPSSPIKWR FGLAAQGEDNPSSPIKWR QESAVDSKGVK VKVFTEHTRVHK
gi298714026	CBJ27258.1	3.03	26	3	1076	117.4	6.3	conserved unknown protein	tpr-like protein	0	0.4865																										KDDGDAIcTTVRALSR KDDGDAIcTTVRALSR KDDGDAIcTTVRALSR KDDGDAIcTTVRALSR KDDGDAIcTTVRALSR ARmLYVK KDDGDAIcTTVRALSR KDDGDAIcTTVRALSR KDDGDAIcTTVRALSR KDDGDAIcTTVRALSR KDDGDAIcTTVRALSR KDDGDAIcTTVRALSR KDDGDAIcTTVRALSR KDDGDAIcTTVRALSR KDDGDAIcTTVRALSR KDDGDAIcTTVRALSR KDDGDAIcTTVRALSR KDDGDAIcTTVRALSR KDDGDAIcTTVRALSR KDDGDAIcTTVRALSR KDDGDAIcTTVRALSR KDDGDAIcTTVRALSR KDDGDAIcTTVRALSR KDDGDAIcTTVRALSR …
gi298714038	CBJ27270.1	2.55	4	3	1292	141.4	5.45	conserved unknown protein	function unknown protein	0	0.5645																										YFQNVVDTVR ALVEQLR AIAPTQFNHQSTR EmHYKNGMK EMHYKNGmK
gi298714138	CBJ27319.1	5.14	5	3	992	102.6	5.19	expressed unknown protein	wdr26 protein	0	0.524																										MEAVEcGGAVLSLSVTR LEQDSIAIDANSAR ASGANGGSGGGGGNGVDEMPRDGQNKLRPLGFK LEQDSIAIDANSAR HGRWREELK
gi298709233	CBJ31173.1	4.04	4	3	1055	107.2	6.68	hypothetical protein Esi_0237_0008	hypothetical protein Esi_0237_0008	0	1																										MEALKSFPNGVQLAGNGAASTSK MEALKSFPNGVQLAGNGAASTSK DTAATASEVK HmSLTTPK ADEPRER
gi299470949	CBN79933.1	4.6	3	3	718	75.2	8.66	conserved unknown protein	zinc finger protein	0	0.609																										LAADAAER QAKATADVAGPPVAR VPYLLAPNK cGLKFGDDR
gi298705330	CBJ49020.1	11.25	3	3	314	34.9	8.4	conserved unknown protein	ptype atpase	0	0.515455																										mNLRAREHGDMK GGERDGENAFK VTWLDLQDGLRKVAESAR
gi298714237	CBJ27373.1	15.97	3	3	215	24.7	9.07	conserved unknown protein	conserved unknown protein	3.65597e-159	0.601111																										DAFRPGEFTATIR GLSVPQLPK NAENGNFSRLEYR NAENGNFSR AEKNIMEKHR
gi299116905	CBN75015.1	2.96	3	3	1613	173	8.69	NB-ARC and TPR repeat-containig protein	tfp pilus assembly protein	0	0.595																										LYVRGDTIELVNPEKR EEAELKAK MDDDEcKLLLQRcSMIETVDWAALR QQQREHEQR
gi298704801	CBJ48949.1	5.6	4	3	679	71.6	11.08	conserved unknown protein	si:ch211- protein	1.89987e-158	0.5705																										LAGLEERMPARR QAIEEAR GNEGGVFVEAGGARVRR GNEGGVFVEAGGARVRR YTVAGFANNSImGRGR
gi298709480	CBJ31384.1	2.99	3	3	1160	126.1	8.91	conserved unknown protein	tubulin-tyrosine ligase family	0	0.6145																										EHQRPRRTR KVIRPQPGDDDDPTGSK KVIRPQPGDDDDPTGSK QPTSScmNR
gi298705292	CBJ48982.1	16.11	22	3	240	25.8	6.64	ankyrin repeat domain protein	ankyrin repeat protein	2.64061e-170	0.541																										GEcADLLIDSGASLTKK GEcADLLIDSGASLTKK GEcADLLIDSGASLTKK GEcADLLIDSGASLTKK GEcADLLIDSGASLTKK GEcADLLIDSGASLTKK GEcADLLIDSGASLTKK GEcADLLIDSGASLTKK GEcADLLIDSGASLTKK GEcADLLIDSGASLTKK GEcADLLIDSGASLTKK GEcADLLIDSGASLTKK GEcADLLIDSGASLTKK GEcADLLIDSGASLTKK GEcADLLIDSGASLTKK GEcADLLIDSGASLTKK GEcADLLIDSGASLTKK GEcADLLIDSGASLTKK GEcADLLIDSGASLTKK GEcADLLIDSGASLTKK GEcADLLIDSGASLTKK GEcADLLIDSGASLTKK GEc…
gi298705648	CBJ28896.1	3.73	5	3	1153	117.7	5.17	similar to protein phosphatase 1, catalytic subunit, gamma isoform isoform 2	serine threonine-protein phosphatase pp1-gamma catalytic subunit	0	0.8635																										RRMmMTGGDGEATSGSAER RRMMmTGGDGEATSGSAER RRmMMTGGDGEATSGSAER SLTAEASSPEDTIR GATTGMGADGGEEEKAR
gi298709984	CBJ31704.1	2.1	21	3	2317	230.6	4.41	conserved unknown protein	cap-gly domain-containing linker protein 3	0	0.7545																										VMPTGGGGGEMTERLR VMPTGGGGGEMTERLR VMPTGGGGGEMTERLR VMPTGGGGGEMTERLR VMPTGGGGGEmTERLR VMPTGGGGGEMTERLR VMPTGGGGGEMTERLR VMPTGGGGGEMTERLR VMPTGGGGGEMTERLR VMPTGGGGGEMTERLR VMPTGGGGGEMTERLR VMPTGGGGGEMTERLR VMPTGGGGGEMTERLR VMPTGGGGGEMTERLR VMPTGGGGGEMTERLR VmPTGGGGGEMTERLR VMPTGGGGGEMTERLR VMPTGGGGGEMTERLR VMPTGGGGGEMTERLR VMPTGGGGGEMTERLR EGVSAVQAINADSGAGGLAR VMPTGGGGGEMTERLR SRKSLIK VMPTGGGGGEMTE…
gi298706302	CBJ29317.1	8.12	17	3	714	72.2	5.78	conserved unknown protein	ran-binding protein	0	0.5675																										APEEAEEKAGDFVIRGVR APEEAEEKAGDFVIRGVR APEEAEEKAGDFVIRGVR APEEAEEKAGDFVIRGVR APEEAEEKAGDFVIRGVR APEEAEEKAGDFVIRGVR APEEAEEKAGDFVIRGVR APEEAEEKAGDFVIRGVR APEEAEEKAGDFVIRGVR APEEAEEKAGDFVIRGVR APEEAEEKAGDFVIRGVR APEEAEEKAGDFVIRGVR APEEAEEKAGDFVIRGVR APEEAEEKAGDFVIRGVR APEEAEEKAGDFVIRGVR APEEAEEKAGDFVIRGVR APEEAEEKAGDFVIRGVR AAAGTSSSSSSFPGRSRQR TAAAAVSAPAAGEGAPSmPAGAK AAAGTSSSSSSFPGRSRQR McKAGQGK AAA…
gi298715417	CBJ28028.1	3.25	3	3	852	90.6	6.83	Acetoacetate--CoA ligase	acetoacetyl- synthase	0	0.583																										ITEEGGVVISGR LAGERSGR KELELHcDIQR
gi299470393	CBN80154.1	4.98	4	3	415	44.2	7.27	expressed unknown protein	expressed unknown protein	0	1	yes	2																								LSWESDmRAAR FRLSWESDmR AGLGTmALWQRPQVRGcVTmSGR AGLGTmALWQRPQVRGcVTmSGR LSWESDMR
gi299473677	CBN78071.1	4.16	3	3	881	94.3	9.33	conserved unknown protein	tubulin polyglutamylase ttll5-like	0	0.6305																										YVEDPmLLDGLK NGGRKGGDDQEHR MSEVHGAR ALGTTcGAK RSGLGDTRGGGLLAWGIR
gi299470852	CBN78675.1	4.32	3	3	903	103.7	6.34	conserved unknown protein	coiled-coil domain containing 147	0	0.6125																										AASLIFDLSKANQATR NLLDDREAMK EAmKQSIR LNLLAMLENmQQLLGEVRNSEVAKK
gi299470673	CBN78613.1	2.89	5	3	1753	186.2	6.79	hypothetical protein Esi_0137_0063	hypothetical protein Esi_0137_0063	0	1																										REmADAGATIAAAcAEAK REmADAGATIAAAcAEAK LVIEQmAER ERAFDIGIDVHEER SmQmVAARSLGADLSK SmQmVAARSLGADLSK SmQmVAARSLGADLSK
gi299470298	CBN78348.1	4.78	13	3	1165	122.7	5.97	conserved unknown protein	protein phosphatase 2c 51	0	0.5345																										DYHSILFQEDYKFYGVFDGHcGTRAAK DYHSILFQEDYKFYGVFDGHcGTRAAK DYHSILFQEDYKFYGVFDGHcGTRAAK DYHSILFQEDYKFYGVFDGHcGTRAAK DYHSILFQEDYKFYGVFDGHcGTRAAK DYHSILFQEDYKFYGVFDGHcGTRAAK DYHSILFQEDYKFYGVFDGHcGTRAAK DYHSILFQEDYKFYGVFDGHcGTRAAK DYHSILFQEDYKFYGVFDGHcGTRAAK DYHSILFQEDYKFYGVFDGHcGTRAAK DYHSILFQEDYKFYGVFDGHcGTRAAK DYHSILFQEDYKFYGVFDGHcGTRAAK LDPEGPEVMKSILR MLLEKGQHVLQAGIR DYHSILFQEDYKFYGVFDGHcGTRAAK DYHS…
gi299117611	CBN75453.1	7.08	9	3	833	86.7	10.52	EsV-1-7	n/a	0	0.639																										mFHVMPATAVFAGDLPSYARGETPSK MFHVmPATAVFAGDLPSYARGETPSK mFHVMPATAVFAGDLPSYARGETPSK MFHVmPATAVFAGDLPSYARGETPSK ATTAAAAASSAAQAGGGGGR mFHVMPATAVFAGDLPSYARGETPSK mFHVMPATAVFAGDLPSYARGETPSK mFHVMPATAVFAGDLPSYARGETPSK MFHVmPATAVFAGDLPSYARGETPSK MFHVmPATAVFAGDLPSYARGETPSK mFHVMPATAVFAGDLPSYARGETPSK MFHVmPATAVFAGDLPSYARGETPSK mFHVMPATAVFAGDLPSYARGETPSK MFHVmPATAVFAGDLPSYARGETPSK MFHVmPATAVFAGDLPSYARGETPSK
gi299116125	CBN76034.1	23.45	3	3	145	17.2	9.23	conserved unknown protein	conserved unknown protein	1.44906e-100	0.659444																										ARLFDVQTELEKEK EMADRLDRVNQGLSR EMADRLDRVNQGLSR DGGDSAWIER EMADRLDRVNQGLSR
gi299115923	CBN75930.1	5.22	4	3	914	98.2	9.58	conserved unknown protein	anoctamin-10 isoform 4	0	0.545	yes	6																								TRcGWGEAQILVKR mRMAGLEVDKLYSLDR MRmAGLEVDKLYSLDR TTSRSMMmSPPPQQR ALTTGDTADAVFAK
gi299115558	CBN75761.1	7.31	3	3	333	38.1	9.96	conserved unknown protein	conserved unknown protein	0	0.616667																										IEEMPSNKR YPDNALEHPKR ARDEYEAAcK RIEEMPSNK AKYPDNALEHPK
gi298712951	CBJ26853.1	2.36	3	3	2231	231.5	5.45	conserved unknown protein	function unknown protein	0	0.585																										AAAAAAAATSALERLGGRGGGAGAAR FLRAcFTEWIK AATAGGAGQQQRQPGHHQLR
gi298709923	CBJ31648.1	8.37	3	3	422	46.5	4.7	hypothetical protein Esi_0270_0042	hypothetical protein Esi_0270_0042	0	0.731538																										DDLIAcYSDVSIR TERAKSEADR mVVAKQDQQER LDTAEGAIAALTETVAEQQLAAQR
gi298708124	CBJ30466.1	4.45	3	3	1145	123.7	8.03	conserved unknown protein	abc1 family protein	0	0.5835	yes	1																								DTQPASEAKKDVVQFHR ALAAVDIDR AASLFGGGESDDGTVPLTDAAAAPATRGR VVVMTFcEGFK
gi298708073	CBJ30426.1	7.22	3	3	508	54.5	9.86	hypothetical protein Esi_0189_0059	hypothetical protein Esi_0189_0059	0	1																										SNEAADDLNR NKTAADGLDRVR SLQEITTASQLLER TANKRLDK
gi298712397	CBJ33178.1	11.11	3	3	378	40.7	6.47	L-ascorbate peroxidase	ascorbate peroxidase	0	0.692																										MGFGDEGIVALSGAHTLGR mGFGDEGIVALSGAHTLGRAFK NVFYRmGFGDEGIVALSGAHTLGRAFK mSSAVSTDAKVAALQEcKK
gi299116895	CBN75005.1	3.22	3	3	1817	187.5	5.77	hypothetical protein Esi_0064_0048	hypothetical protein Esi_0064_0048	0	0.703333	yes	10																								QILEALQEELELR SAHSGPEPGGAEDLPSLTAEALR ASNGGTGAGRGGAVSMAR
gi298710772	CBJ32191.1	3.56	3	3	1222	123.5	7.05	conserved unknown protein	conserved unknown protein	0	0.618																										LLLKMGLR WGGTMGIEPFVPKGHVR RTDSGATAGSSGGSVVADTPSSAASTR
gi299472970	CBN77371.1	2.59	3	3	1699	182.5	7.8	conserved unknown protein	tubulin-tyrosine ligase family protein	0	0.6435																										AKRVQEEEDR TVVPLGDAmLQEVEAVLERAAmASR NmSNSTTTNVVDDLGPSGSITHGASGR GScNGGRGAGGHQK
gi299470683	CBN78623.1	4.85	4	3	794	82.8	5.59	conserved unknown protein	function unknown protein	0	0.548																										LGNFLcNILNcSPSR LSDLEEmFLMAESQTNR LSDLEEMFLmAESQTNR YHARcIYSmPIVR
gi299469751	CBN76605.1	10.96	5	3	520	54.8	9.66	Heat shock protein 40 like protein/ DnaJ domain containing protein	chaperone protein	0	0.728																										MADELSKEEEATDWYVVLGLDVGAR MADELSKEEEATDWYVVLGLDVGAR MADELSKEEEATDWYVVLGLDVGAR mADELSKEEEATDWYVVLGLDVGAR MADELSKEEEATDWYVVLGLDVGAR RSMVGTPIDESDILARMMAMK NGGSEEAHAK
gi298714752	CBJ25651.1	4.72	3	3	710	79.6	5.29	possible ABC-like PK	abc-1 domain-containing protein	0	0.675																										NVGQINAGKIPGFLSGDR VAEPEVRYDPVR YDPVRMEEQLFK
gi298713072	CBJ48847.1	13.69	3	3	307	34.5	6.05	Soluble NSF Attachment Protein (SNAP) Receptor (SNARE)	qa- syp4 tlg2p syntaxin 16-type	0	0.609	yes	1																								ELSALHTKRLMVTFDESEAER ELSALHTKRLMVTFDESEAER EGVSQLQR
gi298713033	CBJ33456.1	9.42	4	3	547	56.4	10.32	conserved unknown protein	function unknown protein	0	0.5675																										NGDSASAAPGVAAESSEAR DQMQALLER KSHPHFmmMVLNRLGFDHmSQGITQSFK SHPHFmmmVLNRLGFDHMSQGITQSFK
gi298712235	CBJ26686.1	4.37	4	3	1236	130.4	6.42	conserved unknown protein	ricin-containing lipase tectonin-like protein	0	0.575	yes	6																								VQVGFVSTTASSSSTGGSSGSAEESFSWVSEAK VQVGFVSTTASSSSTGGSSGSAEESFSWVSEAK SPLASLPINR AVDATGINR
gi298709488	CBJ48503.1	7.92	3	3	752	78.2	4.64	expressed unknown protein	expressed unknown protein	0	0.5285																										AWTLMGYLYGFcGDSAKFRNcQEQAER GFSSSTGHTWPHPVAPASAMMAMDEEK VHQKGEFVLVGSEAmTPPK
gi298707074	CBJ29876.1	6.1	3	3	746	77.8	8.94	conserved unknown protein	conserved unknown protein	0	0.58																										LLQKmEEVGAQLAMGIFASNQATK EDASVAGVGGKRGDGK QQAFGNAmKAK
gi299115517	CBN75721.1	12.27	4	3	273	30.3	8.75	conserved unknown protein	conserved unknown protein	1.77324e-145	0.56																										ANFVTANAVDTILAVPR ANFVTANAVDTILAVPR YQLMAHMVNLDTFGK EQMETQLK
gi299471891	CBN77061.1	35.64	3	3	94	10.9	4.98	conserved unknown protein	c-myc binding protein	6.46268e-61	0.8055																										VLVGLYEEPERPPNAVDYIK SGVIDALTK LQSLTEK
gi298708873	CBJ30830.1	5.17	3	3	658	69.9	5.02	conserved unknown protein	membrane-associated progesterone receptor component 2	0	0.568	yes	1																								SSSTLLDDLSLEGLGR RVAHGASRSDR SETALDGGDAEATK mTLAGWEERFK
gi299117453	CBN73956.1	2.94	3	3	1107	121.6	5.1	basal body protein	basal body protein	0	0.517																										SFLLLEK TEALSSALEAKTGQLAAATEDLEmMAK TEALSSALEAKTGQLAAATEDLEmMAK VEEATDEVRGLR AEATEREGmLAR
gi298709449	CBJ31355.1	4.38	3	3	571	58.6	9.26	Heat Shock transcription factor	heat shock factor protein	0	0.594																										GGEAGAPASFLNK LSSDAAAASKGSR EQVEAGRGGVR
gi299473219	CBN78795.1	2.15	3	3	1302	138.3	5.48	hypothetical protein Esi_0006_0205	hypothetical protein Esi_0006_0205	0	1																										DLMEERWNDLR AELSATGEIER KTSRLEQQMATK
gi299473587	CBN77982.1	5.99	4	3	476	52.8	5.73	argininosuccinate lyase	argininosuccinate lyase	0	0.7625																										AQLVPEMLATDLADYLVR AQLVPEMLATDLADYLVR mRDITMPGDK MRDITmPGDK
gi299470034	CBN79211.1	6.21	3	3	725	81.2	5.07	TYRosinase family member (tyr-4)	ortho-aminophenol oxidase	0	0.5695																										VRDNNPGGLEPDVYGK LTVPYWDFTIETSTSTETVYDPASPYTR RYGAVDDcTR
gi299116559	CBN74747.1	6.38	3	3	706	71.2	9.52	expressed unknown protein	expressed unknown protein	0	1																										AAAAAGPGPEAAAcDAILR AVLGADSGNGGGGGANVLDLDDGDLSGRLR AAMAGAAEEER AAMAGAAEEER
gi299115213	CBN74045.1	22.87	3	3	164	18.8	4.75	centrin	caltractin	1.22679e-108	0.9485																										EAFDLFDTDGSGTIDAK LFDDDETGK mSEKDSREEILK KmISDIDK
gi298715671	CBJ28197.1	25.37	3	3	201	21.7	8.24	ARL6L, ARF-like Ras superfamily GTPase	adp-ribosylation factor-like protein 6-like	2.67578e-144	0.551																										LLVIGLDNAGK SVGTAPTVGTQMVEFHRR DLWVSHASHVHGVIFVVDVTDR
gi298712090	CBJ26670.1	2.8	4	3	1431	155.2	7.85	expressed unknown protein	expressed unknown protein	0	1																										LEVSKAQAADAK LmRTGLAANLMGSSSRRPR LEVSKAQAADAK NGQNTLSSSAIMPLR TPEVPTTAK
gi298705179	CBJ28610.1	9.24	3	3	482	51.3	7.06	conserved unknown protein	nuclear lim factor interactor-interacting protein cleavage-specific form	0	0.7375																										DLLEFWR AQTTTTDNTATTSSLNNTGSSTASTGSTR QSFVASGEEEEmADTILQAR
gi298712094	CBJ26674.1	3.82	3	3	838	88.6	8.15	conserved unknown protein	conserved unknown protein	0	0.5325																										LALELIER TEEALKLLESMREGR ALLLLVEmR
gi298704930	CBJ28433.1	9.98	4	3	466	49.4	9.04	Ngdn protein	ngdn protein	0	0.518																										AMGTVGGSMSGGGYAEGGNGKGK DVEEKVGSLAER AMGTVGGSMSGGGYAEGGNGKGK AKSSGAKGK
gi299471689	CBN76910.1	12.15	3	3	177	18.6	8.4	hypothetical protein Esi_0024_0016	hypothetical protein Esi_0024_0016	5.24983e-84	0.895																										TKELEMARVEDELR ELEmARVEDELRLR KTSRTTDEAER
gi298709619	CBJ31429.1	7.37	3	3	421	47.8	9.79	hypothetical protein Esi_0255_0023	hypothetical protein Esi_0255_0023	0	1																										VAVAEAELGR HEAQAALVKSEEEWEK IEAAERYVGR
gi298713465	CBJ27020.1	4.76	3	3	1041	114.1	4.88	conserved unknown protein	autoinhibited calcium atpase	0	0.5855	yes	10																								RLDENFNGTTGLAK IVRGADIK GDVTEAVATAQSAGVMVRmVTGDNINTAKAIAK
gi298706957	CBJ29776.1	3.2	24	3	1142	114.7	5.36	expressed unknown protein	expressed unknown protein	1.48562e-146	1																										GSTAGAAGGERAPPRK SGGKGAAVRGGAR SGGKGAAVRGGAR SGGKGAAVRGGAR SGGKGAAVRGGAR SGGKGAAVRGGAR SGGKGAAVRGGAR SGGKGAAVRGGAR SGGKGAAVRGGAR SGGKGAAVRGGAR SGGKGAAVRGGAR SGGKGAAVRGGAR SGGKGAAVRGGAR ERGGGGGGGDGFVGGAGKR SGGKGAAVRGGAR SGGKGAAVRGGAR SGGKGAAVRGGAR SGGKGAAVRGGAR SGGKGAAVRGGAR ERGGGGGGGDGFVGGAGKR SGGKGAAVRGGAR SGGKGAAVRGGAR SGGKGAAVRGGAR SGGKGAAVRGGAR SGGKGAAVRGGAR SGGKGAAVRGGAR SGGKGAAVRGGAR
gi299473692	CBN78085.1	8.14	3	3	553	60.4	8.59	conserved unknown protein	calpain-7 (c02 family)	0	0.667																										ATPATPTQQQQPRK QQAGARGGEETSAK KLLSDSIEEWQK EKLVGWSRPSQVMPGEPR
gi299473556	CBN77951.1	14.21	3	3	373	40.9	7.12	Serine/threonine protein kinase/TGF-beta stimulated factor	serine threonine-protein kinase 16	0	0.5435																										GGGGEAASPGFRELVMFALQQDPLK VRGRTEALAAQDEAAVHSTMPYR MSEPYSRTAK
gi299473081	CBN77474.1	3.81	26	3	1181	123.4	9.44	conserved unknown protein	function unknown protein	0	0.56																										ATSPVVSGNAQAEVHATPTANSMAADR ATSPVVSGNAQAEVHATPTANSMAADR ATSPVVSGNAQAEVHATPTANSMAADR ATSPVVSGNAQAEVHATPTANSMAADR ATSPVVSGNAQAEVHATPTANSMAADR ATSPVVSGNAQAEVHATPTANSMAADR ATSPVVSGNAQAEVHATPTANSMAADR ATSPVVSGNAQAEVHATPTANSMAADR ATSPVVSGNAQAEVHATPTANSMAADR ATSPVVSGNAQAEVHATPTANSMAADR ATSPVVSGNAQAEVHATPTANSMAADR ATSPVVSGNAQAEVHATPTANSMAADR ATSPVVSGNAQAEVHATPTANSMAADR ATSPVVSGNAQAEVHATPTANSMAADR ATSPVVS…
gi299471683	CBN76905.1	18.28	4	3	342	35.3	5.43	filamentous temperature sensitive Z	cell division protein	0	0.7945																										ADIAEGGPGTKMVFVPAGmGGGTGSGAPPLVAHVAK ADIAEGGPGTKmVFVPAGMGGGTGSGAPPLVAHVAK TPPPTTPPLPGGANNPSDIPDFLTRLK mSITVLATGFQTK mSITVLATGFQTK
gi299470731	CBN79777.1	4.39	5	3	1140	120.6	6.46	expressed unknown protein	expressed unknown protein	0	0.775																										TADHSPEDLVLIVVDGRDQAELLGPLYR GATTPFALWDTPTSSAR TADHSPEDLVLIVVDGRDQAELLGPLYR GDTDGSPSSLVR TADHSPEDLVLIVVDGRDQAELLGPLYR DcREVAEALGVSPSK
gi299469950	CBN76804.1	8.69	4	3	731	80.1	5.59	conserved unknown protein	function unknown protein	0	0.584																										FNGNNGYVHGGQGADPAGASAAEPAAGLMR SQAVFGMLAMDFVAKPR FNGNNGYVHGGQGADPAGASAAEPAAGLMR FMLRVIFGDDcKHR
gi299117190	CBN75154.1	5.45	4	3	983	104.7	5.02	conserved unknown protein	morn repeat protein	0	0.5415																										GESTDGEGGQEKPLEEEKTMR VALEGGDWVLRVEDVSHGEGPDEYGSTGR VALEGGDWVLRVEDVSHGEGPDEYGSTGR WEEETRR VALEGGDWVLRVEDVSHGEGPDEYGSTGR
gi298711096	CBJ32325.1	5.14	3	3	428	49.5	9.52	conserved unknown protein	tpr repeat-containing protein	0	0.6305																										ENATEDERKK KVGELELR EHmRLGRR
gi298710477	CBJ25541.1	3.85	3	3	947	104.4	4.83	conserved unknown protein	uncharacterized conserved protein	0	0.4765																										LMQMSEDDQLLNPELR YHFTLISNEYHLSR GWAMcAALLER SAAWPRQK
gi298709296	CBJ31233.1	3.82	3	3	628	68.4	7.34	gill-specific calpain	gill-specific calpain	0	0.4385																										DPNQVWGPLIEK IPSRQRNR QHLWAKmK
gi298708070	CBJ30423.1	10.82	30	3	476	49.3	4.87	hypothetical protein Esi_0189_0054	hypothetical protein Esi_0189_0054	6.3318e-64	1																										ATEEAFSGEYVPMDPLDWRARGR ATEEAFSGEYVPMDPLDWRARGR ATEEAFSGEYVPMDPLDWRARGR ATEEAFSGEYVPMDPLDWRARGR ATEEAFSGEYVPMDPLDWRARGR ATEEAFSGEYVPMDPLDWRARGR ATEEAFSGEYVPMDPLDWRARGR ATEEAFSGEYVPMDPLDWRARGR ATEEAFSGEYVPMDPLDWRARGR ATEEAFSGEYVPMDPLDWRARGR ATEEAFSGEYVPMDPLDWRARGR ATEEAFSGEYVPMDPLDWRARGR ATEEAFSGEYVPMDPLDWRARGR ATEEAFSGEYVPMDPLDWRARGR ATEEAFSGEYVPMDPLDWRARGR ATEEAFSGEYVPMDPLDWRARGR ATEEAFSGEYVPMDP…
gi298705991	CBJ29112.1	5.43	3	3	913	101	7.47	conserved unknown protein	tpr repeat-containing protein	0	0.463																										ASTGIADPDLFIQK mmGVIRGEIQEYRSELDSLTIK VASNPDGTAGKVPDR
gi298705909	CBJ29039.1	7.16	4	3	936	102.8	6.79	conserved unknown protein	tak1	0	0.507																										EEHALGRTRADLSFSQQTNPAAPTAK GMTLGDcIPLLHSWFKAFmATFAVYR FTGGYTVRFmcKPGNNIRSTMLAVLEDK GMTLGDcIPLLHSWFKAFmATFAVYR
gi299472013	CBN80096.1	5.83	3	3	858	93	6.48	cAMP-dependent protein kinase catalytic subunit (PKA)	cgmp-dependent protein	0	0.582																										DVPVFTGDNSIFANW SGEWLmQEGEPGDAMYVIKTGK SGTADRSEFASYR
gi298708975	CBJ30928.1	9.91	3	3	323	36.2	5.69	Aldo/Keto Reductase	aldo-keto reductase	0	0.649																										SPAQVIIR LWNTFHRPELLK LYEGETSAYPEK
gi299472738	CBN80306.1	8.32	3	3	589	66	5.63	Histidine kinase-like protein	pas pac sensor hybrid histidine kinase	0	0.544																										EGVGTTmLFTSILPLPDDGAcSDKKK GNVPYHATVR EmFVELNGALKTR
gi298705631	CBJ28879.1	6.6	5	3	470	54.9	9.42	conserved unknown protein	function unknown protein	0	0.5875																										VVLTQAELDR SNLLYAEVIETR EEKEALQQR VVLTQAELDR VVLTQAELDR
gi299116327	CBN76131.1	14.59	3	3	281	28.8	9.47	conserved unknown protein	p25-alpha family protein	2.9393e-153	0.575																										IASVTGVSSSGTVAQASR LMGDSGLTGK LMGDSGLTGKSLTRTDcDLIFTK
gi298714581	CBJ27572.1	10.54	3	3	313	34.4	5.68	41 kDa flavoprotein	nadh:flavin oxidoreductase nadh oxidase	0	0.6785																										TDDYGGSLENR LADDQDVRHGGK mVcQIWHcGR
gi298706280	CBJ29305.1	4.59	4	3	936	104.7	5.19	serine/threonine protein phosphatase	serine threonine protein phosphatase	0	0.551																										AcHELFDALPLcALIQER RYmTMEKAYGELDK LDNMNEQLAIK RYMTmEKAYGELDK
gi298704815	CBJ48963.1	24.31	3	3	181	20.8	7.44	Arf1, ARF family GTPase	adp-ribosylation factor	1.41668e-131	0.949																										ILMVGLDAAGK QDLPNAmSAAEmTDKLGLHGLR mGLAFSRLWER
gi299470797	CBN79843.1	9.55	3	3	576	63.9	7.74	Flagellar WD repeat-containing protein Pf 20	flagellar wd repeat-containing protein pf 20	0	100																										GHEDAVQSVLFSPADDSLVSTSSDcTFR TLDSFNTEWYELQAK MVAEIGTMEAGQHPLNSVcLDR GHVDSVNAVAWQPFTNNLcTGSGDK NEELDEQVVALR
gi298712441	CBJ33217.1	10.02	3	3	489	53.4	6.92	conserved unknown protein	tpr domain containing protein	0	100																										AIDEMQAVGVTTVPARTSGPQRK AYTELEDPTR AYNSLAQYYQEMNDPK
gi298708301	CBJ48364.1	6.62	3	3	786	84.3	5.66	conserved unknown protein	ankyrin repeat protein	0	100																										DLISAGANLYAK FINGSGDLDEK NAHQARIDGDQHHPFVDSDNGNAVEDcDK
gi298707353	CBJ29997.1	13.06	3	3	314	33.6	6.24	Glyceraldehyde 3-phosphate dehydrogenase; alternative name: imm downregulated 12	glyceraldehyde 3-phosphate	0	100																										YLLIHDSVHGK MKEASDGSMK mKEASDGSmKGVLGYEDSEVVSQDFVHDSR
gi298713765	CBJ33732.1	6.56	33	2	381	41.5	9.92	hypothetical protein Esi_0577_0005	hypothetical protein Esi_0577_0005	0	1																										RSAWSFPVSGASVSPSR RSAWSFPVSGASVSPSR RSAWSFPVSGASVSPSR RSAWSFPVSGASVSPSR RSAWSFPVSGASVSPSR RSAWSFPVSGASVSPSR RSAWSFPVSGASVSPSR RSAWSFPVSGASVSPSR RSAWSFPVSGASVSPSR RSAWSFPVSGASVSPSR RSAWSFPVSGASVSPSR RSAWSFPVSGASVSPSR RSAWSFPVSGASVSPSR RSAWSFPVSGASVSPSR RSAWSFPVSGASVSPSR RSAWSFPVSGASVSPSR RSAWSFPVSGASVSPSR RSAWSFPVSGASVSPSR RSAWSFPVSGASVSPSR RSAWSFPVSGASVSPSR RSAWSFPVSGASVSPSR RSAWSFPVSGASVSPSR RSA…
gi298710361	CBJ31978.1	35.21	3	2	89	10.2	7.37	putative: flagellar outer dynein arm light chain 6	dynein light chain cytoplasmic	2.6826e-59	0.98																										NADMSEDMQQDAVDcASQALEK NADMSEDMQQDAVDcASQALEK YNIEKDIAAFIK DIAAFIKK DIAAFIKKEFDK
gi298709433	CBJ31339.1	3.56	20	2	1124	117.2	8.44	similar to spermatogenesis associated factor SPAF	spermatogenesis-associated protein 5-like	0	0.6635																										VVSTmLALMDGVDAQEQFVRcPSAR VVSTMLALmDGVDAQEQFVRcPSAR VVSTMLALmDGVDAQEQFVRcPSAR VVSTMLALmDGVDAQEQFVRcPSAR VVSTmLALMDGVDAQEQFVRcPSAR VVSTMLALmDGVDAQEQFVRcPSAR VVSTMLALmDGVDAQEQFVRcPSAR VVSTmLALMDGVDAQEQFVRcPSAR VVSTmLALMDGVDAQEQFVRcPSAR VVSTMLALmDGVDAQEQFVRcPSAR VVSTMLALmDGVDAQEQFVRcPSAR VVSTMLALmDGVDAQEQFVRcPSAR VVSTMLALmDGVDAQEQFVRcPSAR VVSTmLALMDGVDAQEQFVRcPSAR VVSTmLALMDGVDAQEQFVRcPSAR VVSTmLALM…
gi299115899	CBN75908.1	5.39	30	2	575	62.8	9.45	Pheophorbide a oxygenase, putative chloroplast precursor	pheophorbide a chloroplast precursor	0	0.485																										QWYPVVVmRDLEAR QWYPVVVmRDLEAR QWYPVVVmRDLEAR QWYPVVVmRDLEAR QWYPVVVmRDLEAR QWYPVVVmRDLEAR QWYPVVVmRDLEAR QWYPVVVmRDLEAR QWYPVVVmRDLEAR QWYPVVVmRDLEAR QWYPVVVmRDLEAR QWYPVVVmRDLEAR QWYPVVVmRDLEAR QWYPVVVmRDLEAR QWYPVVVmRDLEAR QWYPVVVmRDLEAR QWYPVVVmRDLEAR QWYPVVVmRDLEAR QWYPVVVmRDLEAR QWYPVVVmRDLEAR QWYPVVVmRDLEAR QWYPVVVmRDLEAR QWYPVVVmRDLEAR QWYPVVVmRDLEAR QWYPVVVmRDLEAR QWYPVVVmRDLEAR QWYPVVVmR…
gi299470433	CBN80194.1	6.19	3	2	404	44.1	4.48	Tubular mastigoneme-related gene	sig2-like protein	0	0.504																										cDPGYEGVDcSYR MScPNDcSGHGR MScPNDcSGHGR mScPNDcSGHGR
gi298711954	CBJ48641.1	18.18	2	2	143	15.8	6.18	conserved unknown protein	nucleoside diphosphate	5.37174e-102	0.7935	yes	1																								NVcHGSDSTDSAEHEIK NVcHGSDSTDSAEHEIK NLVGEIIAR
gi299470617	CBN80239.1	6.52	2	2	271	30	5	p28, 28 kDa light chain of axonemal inner dynein arms	axonemal dynein light chain p33	1.1269e-151	0.7775																										EWTEETGTWMQYVSK HVTLDGPER
gi298705069	CBJ28528.1	12.36	13	2	186	20.4	8.38	expressed unknown protein	expressed unknown protein	3.6382e-81	1	yes	1																								WQMDLIESKAKGDEK WQMDLIESKAKGDEK WQMDLIESKAKGDEK WQMDLIESKAKGDEK WQMDLIESKAKGDEK WQMDLIESKAKGDEK WQmDLIESKAKGDEK WQMDLIESKAKGDEK WQMDLIESKAKGDEK WQMDLIESKAKGDEK WQMDLIESKAKGDEK WQMDLIESKAKGDEK WQMDLIESKAKGDEK WQMDLIESKAKGDEK WQMDLIESKAKGDEK WQMDLIESKAKGDEK WQMDLIESKAKGDEK KWQmDLIESK KWQMDLIESK
gi298713879	CBJ33758.1	28.26	2	2	92	10.4	7.03	hypothetical protein Esi_0592_0002	dynein light chain cytoplasmic	5.08927e-61	0.745																										VDAQNWAAAAIESK MVSDMDDHGEMR MVSDmDDHGEmR
gi299117158	CBN75122.1	18.6	2	2	129	14.8	9.58	ubiquitin	ubiquitin extension protein	4.84472e-53	0.8515																										ESTLHLVLR QLEDELTLADYDMQK
gi299117383	CBN75339.1	7.72	17	2	678	68	4.42	hypothetical protein Esi_0078_0082	hypothetical protein Esi_0078_0082	2.50216e-179	1																										MLQASAEDGccLQGVDGFAAmERAWAELR MLQASAEDGccLQGVDGFAAMERAWAELR MLQASAEDGccLQGVDGFAAMERAWAELR MLQASAEDGccLQGVDGFAAMERAWAELR MLQASAEDGccLQGVDGFAAMERAWAELR MLQASAEDGccLQGVDGFAAMERAWAELR MLQASAEDGccLQGVDGFAAmERAWAELR MLQASAEDGccLQGVDGFAAMERAWAELR MLQASAEDGccLQGVDGFAAMERAWAELR MLQASAEDGccLQGVDGFAAMERAWAELR MLQASAEDGccLQGVDGFAAMERAWAELR MLQASAEDGccLQGVDGFAAMERAWAELR mLQASAEDGccLQGVDGFAAMERAWAELR MLQASAEDG…
gi298707891	CBJ30288.1	4.53	2	2	802	84.3	5.39	conserved unknown protein	spermatogenesis associated 4	0	0.6725																										LLPLPLEWDSLAVAR MHGFDNGTATRVK
gi298708246	CBJ48309.1	14.93	2	2	192	21.3	5.06	Dynein light chain flagellar outer dynein arm light chain LC1	dynein light chain axonemal-like	1.17155e-136	0.7305																										NEASAEEATVVK LYMSNNSVK IEVLRHIPQVSKIDGDmVKPTER
gi299470811	CBN78634.1	8.53	6	2	289	32.2	6.67	conserved unknown protein	calpain-like protein	0	0.638																										AVRRMEGFSGDFmMIDGGK AVRRMEGFSGDFMmIDGGK AVRRMEGFSGDFmMIDGGK AVRRMEGFSGDFMmIDGGK AVRRmEGFSGDFMMIDGGK AVRRmEGFSGDFMMIDGGK FNGKFYPSTDPPGK
gi298706764	CBJ29687.1	4.59	2	2	589	64.6	8.1	Isocitrate lyase (Isocitrase) (Isocitratase) (ICL)	isocitrate lyase	0	0.726																										LSKDWGEKAGLmR GLQGRDQR QVNIATGGLASTSAmGEGVTESQFVR
gi299472236	CBN77206.1	4.02	2	2	539	55.5	9.85	Heat Shock transcription factor	heat shock transcription factor	0	0.701																										GSSSIGENVAFGKR SSPFTSSR
gi299471929	CBN79610.1	5.11	3	2	985	99.9	5.33	hypothetical protein Esi_0271_0041	hypothetical protein Esi_0271_0041	2.7502e-101	1																										EmEEAVAKAMPPPPPPDNTADVDVGGDSSDVNK EMEEAVAKAmPPPPPPDNTADVDVGGDSSDVNK AERQEAER
gi298714400	CBJ27457.1	5.95	2	2	224	25.3	9.73	conserved unknown protein	ef hand family protein	1.71972e-162	0.512																										LcEQVEK LSKEEAR TLcKQR
gi298708371	CBJ48434.1	2.68	2	2	821	89.3	5.45	hypothetical protein Esi_0002_0243	hypothetical protein Esi_0002_0243	0	1																										SMKEISAIK TLVFNLAcKVMR GGGDVPTTK
gi299115569	CBN75772.1	3.81	2	2	709	72.2	7.58	hypothetical protein Esi_0174_0041	hypothetical protein Esi_0174_0041	0	0.74																										EMISAETR VNImPHERQAMSKPVADGGAKSGK QAmSKPVADGGAKSGKK
gi298709013	CBJ30964.1	1.41	2	2	3146	299.3	4.44	conserved unknown protein	function unknown protein	0	0.604444																										GTVGPGGGVEIFGGSSDDDQSRGR GNSHGSGGDGGSVFIDAGR IQSGQSWHGSSGGVGVHTPNAGK
gi299116316	CBN76122.1	2.63	2	2	862	92.7	5.22	conserved unknown protein (Partial)	strawberry notch-like protein	0	0.5705																										MQDKEDFRAEK AmKmQDK
gi299470119	CBN78148.1	4.93	2	2	480	50.8	5	conserved unknown protein	enolase	0	0.804	yes	1																								VVGREIIDSR IQTVGDDLTVTNIKR YSGKGVLK
gi298714146	CBJ27327.1	7.59	2	2	316	34.1	7.02	conserved unknown protein	nb-arc and tpr repeat-containing protein	0	0.596842																										DELAALEK MVTTLSDAAVEAANLALKMGSTAVDMISFVHR TLTAmRETVETVQQNR
gi299471777	CBN76998.1	6.04	6	2	695	74.1	5.06	conserved unknown protein	ecotropic viral integration site 5 protein homolog	0	0.53																										VPGLYSALLMSADAMDANDmTGVRGPK AMNGTVSIASPVK VPGLYSALLMSADAmDANDMTGVRGPK VPGLYSALLMSADAmDANDMTGVRGPK VPGLYSALLMSADAMDANDmTGVRGPK VPGLYSALLmSADAMDANDMTGVRGPK VPGLYSALLMSADAmDANDMTGVRGPK AMNGTVSIASPVK RRFETSSPmPVQLLLLNDQWTEGGGEDGELSPK
gi298712959	CBJ26861.1	5.94	3	2	886	91.4	8.69	conserved unknown protein	function unknown protein	0	0.5105																										RAENNSGSGGRSGDLQR RAENNSGSGGRSGDLQR GTAAGGGKISAGAGLGGSGGPEVYSFATPScVSLELAR LTGGETGEGAGAIKPKER
gi299116070	CBN74486.1	10.88	14	2	343	38.2	6.43	conserved unknown protein	acetyltransferase (isoleucine patch superfamily protein)	0	0.578462																										DLFSRGDGGRGDIVASR DLFSRGDGGRGDIVASR DLFSRGDGGRGDIVASR DLFSRGDGGRGDIVASR DLFSRGDGGRGDIVASR DLFSRGDGGRGDIVASR DLFSRGDGGRGDIVASR DLFSRGDGGRGDIVASR DLFSRGDGGRGDIVASR DLFSRGDGGRGDIVASR DLFSRGDGGRGDIVASR DLFSRGDGGRGDIVASR DLFSRGDGGRGDIVASR DLFSRGDGGRGDIVASR DLFSRGDGGRGDIVASR DLFSRGDGGRGDIVASR DLFSRGDGGRGDIVASR
gi298710205	CBJ26280.1	3.5	2	2	658	72.3	6.23	hypothetical protein Esi_0029_0056	hypothetical protein Esi_0029_0056	0	0.633333																										ALASVVmK SDTETmRQRLK ATIEKQEEESER
gi298715607	CBJ34066.1	3.04	36	2	1140	115.5	9.41	hypothetical protein Esi_0929_0001	hypothetical protein Esi_0929_0001	0	1																										AQAAAMAGVAPSAQSPNGVSK AQAAAMAGVAPSAQSPNGVSK AQAAAMAGVAPSAQSPNGVSK AQAAAMAGVAPSAQSPNGVSK AQAAAMAGVAPSAQSPNGVSK AQAAAMAGVAPSAQSPNGVSK AQAAAMAGVAPSAQSPNGVSK AQAAAMAGVAPSAQSPNGVSK AQAAAmAGVAPSAQSPNGVSK AQAAAMAGVAPSAQSPNGVSK AQAAAMAGVAPSAQSPNGVSK AQAAAMAGVAPSAQSPNGVSK AQAAAMAGVAPSAQSPNGVSK AQAAAMAGVAPSAQSPNGVSK AQAAAMAGVAPSAQSPNGVSK AQAAAMAGVAPSAQSPNGVSK AQAAAMAGVAPSAQSPNGVSK AQAAAMAGVAPSAQSPNGVSK AQA…
gi298705540	CBJ28807.1	3.15	2	2	763	79.3	9.88	conserved unknown protein	calcineurin subunit b	0	0.669																										FVGAAEIR GAPPGMAPAPGAPQSPPPR KKQAMDDFAR
gi298705868	CBJ29013.1	4.14	2	2	588	61.3	9.13	DnaJ domain containing protein	hypotherical protein	0	0.781																										KTPYPTETR SSSSNSRGGSDGSMGGLLQEVDR GAGGGATRASMMSSHTVVDGRSR GAGGGATRASMMSSHTVVDGRSR
gi299470227	CBN79531.1	4.48	2	2	862	87.1	9.09	conserved unknown protein	protein kinase-like protein	0	0.6485																										LIFGVLGSPTEDRWPGWTKLPGAK TWNLLYNHQGK EGFPITALR
gi299117349	CBN75305.1	7.04	2	2	322	35.6	5	conserved unknown protein	function unknown protein	0	0.525																										TFKWYNEFFYDISNTALK DKGIFTF
gi299116789	CBN74902.1	4.07	4	2	491	51.5	7.94	conserved unknown protein	function unknown protein	0	0.741																										TVDIASVVREADIVVcAAGR TVDIASVVREADIVVcAAGR TVDIASVVREADIVVcAAGR TVDIASVVREADIVVcAAGR TVDIASVVR
gi298715219	CBJ27891.1	16.25	6	2	203	22.9	4.45	conserved unknown protein	s-adenosyl-l-methionine-dependent methyltransferase-like	5.38245e-146	0.6215																										VQELFERDEWESGSLTQEGKITSK VQELFERDEWESGSLTQEGKITSK VQELFER DMVEFETGSFDAVIDKGLTDSVMYNDK VQELFERDEWESGSLTQEGKITSK VQELFERDEWESGSLTQEGKITSK VQELFERDEWESGSLTQEGKITSK VQELFERDEWESGSLTQEGKITSK VQELFERDEWESGSLTQEGKITSK
gi298712180	CBJ33052.1	14.5	22	2	200	20.8	7.28	conserved unknown protein	conserved unknown protein	9.33222e-98	0.786667																										HPDAPPLFDDDNDEATAPAPSPSRNARGR HPDAPPLFDDDNDEATAPAPSPSRNARGR HPDAPPLFDDDNDEATAPAPSPSRNAR HPDAPPLFDDDNDEATAPAPSPSRNARGR HPDAPPLFDDDNDEATAPAPSPSRNARGR HPDAPPLFDDDNDEATAPAPSPSRNARGR HPDAPPLFDDDNDEATAPAPSPSRNARGR HPDAPPLFDDDNDEATAPAPSPSRNARGR HPDAPPLFDDDNDEATAPAPSPSRNARGR HPDAPPLFDDDNDEATAPAPSPSRNARGR HPDAPPLFDDDNDEATAPAPSPSRNARGR HPDAPPLFDDDNDEATAPAPSPSRNARGR HPDAPPLFDDDNDEATAPAPSPSRNARGR HPDAPPLFDDD…
gi298711272	CBJ26517.1	6.73	2	2	218	24.7	10.84	expressed unknown protein	expressed unknown protein	1.49835e-140	1																										QQEAKNLQR GAIEAVRK
gi298711160	CBJ32385.1	33.77	6	2	151	15.4	5.83	conserved unknown protein	sam domain family protein	1.13056e-59	0.677																										EAEVDLATLcImSEQDFRELGILK EAEVDLATLcImSEQDFRELGILK EAEVDLATLcImSEQDFRELGILK EAEVDLATLcImSEQDFRELGILK QPGSVGSLGAGSGSGGGGVPGPGGGGR EAEVDLATLcImSEQDFRELGILK EAEVDLATLcImSEQDFRELGILK
gi298710625	CBJ32053.1	6	25	2	350	38	6.83	conserved unknown protein	conserved unknown protein	0	0.6																										EEQEPEKGNAAAAVRGEK EEQEPEKGNAAAAVRGEK EEQEPEKGNAAAAVRGEK EEQEPEKGNAAAAVRGEK EEQEPEKGNAAAAVRGEK EEQEPEKGNAAAAVRGEK EEQEPEKGNAAAAVRGEK EEQEPEKGNAAAAVRGEK EEQEPEKGNAAAAVRGEK EEQEPEKGNAAAAVRGEK EEQEPEKGNAAAAVRGEK EEQEPEKGNAAAAVRGEK EEQEPEKGNAAAAVRGEK EEQEPEKGNAAAAVRGEK EEQEPEKGNAAAAVRGEK EEQEPEKGNAAAAVRGEK EEQEPEKGNAAAAVRGEK EEQEPEKGNAAAAVRGEK EEQEPEKGNAAAAVRGEK EEQEPEKGNAAAAVRGEK EEQEPEKGNAAAAVRGEK …
gi298710511	CBJ25575.1	5.27	5	2	436	47.7	8.12	hypothetical protein Esi_0003_0246	hypothetical protein Esi_0003_0246	0	0.583333																										NQLENSLKKK SLDEMLENLR SLDEMLENLR SLDEMLENLR SLDEMLENLR SLDEMLENLR SLDEMLENLR
gi298710462	CBJ25526.1	2.4	29	2	1029	115.4	6.54	conserved unknown protein	function unknown protein	0	0.4545	yes	7																								QcLKEMTTGFLLSAADK QcLKEMTTGFLLSAADK QcLKEMTTGFLLSAADK QcLKEMTTGFLLSAADK QcLKEMTTGFLLSAADK QcLKEMTTGFLLSAADK QcLKEMTTGFLLSAADK QcLKEMTTGFLLSAADK QcLKEMTTGFLLSAADK QcLKEMTTGFLLSAADK QcLKEMTTGFLLSAADK QcLKEMTTGFLLSAADK QcLKEMTTGFLLSAADK QcLKEMTTGFLLSAADK QcLKEMTTGFLLSAADK QcLKEMTTGFLLSAADK QcLKEMTTGFLLSAADK QcLKEMTTGFLLSAADK QcLKEMTTGFLLSAADK QcLKEMTTGFLLSAADK QcLKEMTTGFLLSAADK QcLKEMTTGFLLSAADK QcL…
gi298709720	CBJ31524.1	9.66	6	2	459	52.3	6.87	similar to regulator of G-protein signaling 16	regulator of g-protein signaling 16	0	0.717	yes	6																								LAGDTEYLYSFTKGFSEmPSPAQLK LAGDTEYLYSFTKGFSEmPSPAQLK LAGDTEYLYSFTKGFSEmPSPAQLK RIVDASELEQR LAGDTEYLYSFTKGFSEmPSPAQLK LAGDTEYLYSFTKGFSEmPSPAQLK LAGDTEYLYSFTKGFSEmPSPAQLK KYVETMVAQELVDFYLDSLDREEIK
gi298709589	CBJ31415.1	7.51	4	2	493	53.3	4.88	conserved unknown protein	mitogen-activated protein kinase kinase 2	0	0.582																										EVETLSSMEcPSLINLDGSIHVVLEYmDR EVETLSSMEcPSLINLDGSIHVVLEYmDR EVETLSSMEcPSLINLDGSIHVVLEYmDR EVETLSSMEcPSLINLDGSIHVVLEYmDR EVETLSSmEcPSLINLDGSIHVVLEYMDR GSSGGGmIQTMR
gi298709236	CBJ31176.1	6.88	12	2	615	69.5	5.91	putative scytonemin-related tyrosinase	scytonemin-related tyrosinase	0	0.5355																										DDHFcYGHNPADVQPFHDLFLGQATGK DDHFcYGHNPADVQPFHDLFLGQATGK DDHFcYGHNPADVQPFHDLFLGQATGK DDHFcYGHNPADVQPFHDLFLGQATGK DDHFcYGHNPADVQPFHDLFLGQATGK LVDNLTDEQGHAHDRIPGYTADETK DDHFcYGHNPADVQPFHDLFLGQATGK DDHFcYGHNPADVQPFHDLFLGQATGK GGHDQQRRAMR DDHFcYGHNPADVQPFHDLFLGQATGK DDHFcYGHNPADVQPFHDLFLGQATGK DDHFcYGHNPADVQPFHDLFLGQATGK DDHFcYGHNPADVQPFHDLFLGQATGK DDHFcYGHNPADVQPFHDLFLGQATGK LVDNLTDEQGHAHDRIPGYTADETK…
gi298706566	CBJ29525.1	4.16	2	2	850	92.9	10.36	hypothetical protein Esi_0150_0004	hypothetical protein Esi_0150_0004	0	1																										DTLSGEIGRRTLLDEQLGIR EPPSPGRDGQR EGRARAWGPPR SRPAEREAVHHVR
gi270118727	CAT18807.1	7.98	2	2	522	59.1	6.54	Light-independent protochlorophyllide reductase subunit B	light-independent protochlorophyllide reductase subunit b	0	0.878																										LMSDLNIKINSIIPEGASVQDLK LMSDLNIKINSIIPEGASVQDLK IASSFKNVHAIMHAPLGDDYFNVMRSmLER IASSFKNVHAIMHAPLGDDYFNVmRSMLER SIDcQNLTGKKAIVFGDSTHAAAMTK
gi299469803	CBN76657.1	5.69	16	2	642	69.7	6.98	expressed unknown protein	expressed unknown protein	0	0.74																										SSGRMSITFTRQDGGGGAK SSGRMSITFTRQDGGGGAK SSGRMSITFTRQDGGGGAK SSGRMSITFTRQDGGGGAK SSGRMSITFTRQDGGGGAK SSGRMSITFTRQDGGGGAK SSGRMSITFTRQDGGGGAK SSGRMSITFTRQDGGGGAK SSGRMSITFTRQDGGGGAK SSGRMSITFTRQDGGGGAK SSGRMSITFTRQDGGGGAK SSGRMSITFTRQDGGGGAK SSGRMSITFTRQDGGGGAK KDEFPLISVPLDTWVGR KDEFPLISVPLDTWVGR SSGRMSITFTRQDGGGGAK SSGRMSITFTRQDGGGGAK SSGRMSITFTRQDGGGGAK SSGRMSITFTRQDGGGGAK SSGRMSITFTRQDGGGGAK SSG…
gi298710870	CBJ26379.1	11.87	2	2	316	33.9	9.69	hypothetical protein Esi_0032_0101	hypothetical protein Esi_0032_0101	7.86905e-166	0.825																										mVQARPYAERVAEFRPFAcSDFIIPmFTK RPTLTSSNNKETAKAAR
gi298714739	CBJ25638.1	2.94	2	2	613	64.2	7.03	conserved unknown protein	major facilitator superfamily	0	0.543	yes	7																								VSGMGLVSAAGR ILcPGNDARLQR
gi298711462	CBJ32601.1	1.91	2	2	1073	109.2	5.58	expressed unknown protein	expressed unknown protein	0	1																										SSKVQAGGGGSGGR RLSLLYATHELFR
gi299470477	CBN78469.1	1.32	2	2	1059	114.7	6.83	conserved unknown protein	function unknown protein	0	0.6015	yes	8																								LLQMLWR TLTSVRAFSWELSR
gi298715082	CBJ33997.1	3.28	2	2	1084	111.4	6.61	conserved unknown protein	serine threonine protein kinase	0	0.7535																										VEKSRmESIVK LSGFGLARGVSR GEGEASLDGGGGVGGDSSRSGSKVGGEGYSQHQHQEK
gi298714007	CBJ27239.1	2.38	2	2	799	88.3	8.62	conserved unknown protein	transmembrane protein	0	0.4925	yes	2																								TLDDERASRQSAELK TLDDERASRQSAELK LYTVFNLR
gi298711451	CBJ32590.1	4.06	3	2	579	62.9	6.35	pseudouridine synthase	pseudouridylate synthase 7 homolog	0	0.5125																										QDGVDDVILNGHPQK GGGQEEVVR QDGVDDVILNGHPQK EQEGGGRR
gi299472663	CBN78315.1	1.99	2	2	1982	205.2	6.27	ATP-binding cassette superfamily	atp-binding cassette superfamily	0	0.628	yes	13																								EGVATLSVIALAFGVLSFLLFYVFTRTSPLR ASGHVSVSLDGR TGVGEDVPPGAIFRPGAALDLRRGLR
gi299471127	CBN78985.1	6.32	3	2	261	30.7	9.67	conserved unknown protein	conserved unknown protein	9.47787e-145	1																										TNAKSAREQR ATANLMLEAKNTR ATANLMLEAKNTR ATANLMLEAKNTR ATANLMLEAKNTR
gi298714238	CBJ27374.1	2.52	2	2	734	76.8	4.7	similar to ankyrin 2,3/unc44	ankyrin repeat protein	0	0.473																										LGSDGSRRALGAK EDATVGTRENK
gi298709977	CBJ31699.1	19.11	3	2	246	26	6.25	expressed unknown protein	expressed unknown protein	1.16359e-104	1																										WKPELAAESPESGEGGQGPAAGNGRDGSMELR GEDNLFATAEPRLLK WKPELAAESPESGEGGQGPAAGNGRDGSMELR
gi298709880	CBJ26220.1	8.07	2	2	310	31.1	10.23	expressed unknown protein	expressed unknown protein	3.25219e-114	1																										MLQGSRKPKSR GGNGTGQLLQASSTRGFVVMFDSTQRAG
gi298709598	CBJ49245.1	2	2	2	827	87.7	5.27	conserved unknown protein	ddb1- and cul4-associated factor 8-like	0	0.615																										SDETTTAAPAAAGASKK NMGATLLR
gi298709116	CBJ31062.1	4.22	2	2	734	78.1	5.63	putative, spindle assembly abnormal protein 6	spindle assembly abnormal protein 6 homolog	0	0.506																										DNELAGGAVGGDAIR AEEAAAARSVEmGALR
gi298707879	CBJ30276.1	2.54	2	2	649	73.5	8.37	conserved unknown protein	rac-beta serine threonine-protein kinase-	0	0.544																										LLNQSNDQR GYMAPEMAK
gi298705397	CBJ28687.1	3.45	2	2	812	86.6	5.16	conserved unknown protein	kif1-binding protein homolog	0	0.4835																										LGVIALAVEENSAAQEALDK EALQKAR
gi298705203	CBJ28634.1	1.96	3	2	1248	133.6	8.75	conserved unknown protein	family protein	0	0.55																										QSEAAQKWR EWcRTMLTcKLAK EWcRTMLTcKLAK
gi298715637	CBJ28163.1	3.74	2	2	401	45.6	9.73	conserved unknown protein	flagellar associated protein	0	0.5335																										IAQQLQER KLQAVLK
gi298712255	CBJ26706.1	10.65	2	2	277	29.3	7.09	ankyrin repeat domain protein	ankyrin repeat protein	1.47016e-178	0.561																										IAAGDLMGASVNEAER DGSNGYSPLDcSVRSDGMDLTRQVLQR
gi298714407	CBJ27464.1	3.4	2	2	838	85.1	4.72	UDP-glucose:glycoprotein glucosyltransferase, N-terminal fragment, family GT24	udp-glucose:glycoprotein glucosyltransferase	0	0.438																										IGAPEGALSGDRGRSLLTK TVSVSAAAAGSAAGTAATR
gi299473717	CBN78110.2	4.86	2	2	607	61.8	9.58	Heat Shock transcription factor (Partial)	heat shock transcription factor	0	0.6615																										GGRKSTDSNR LVPSAENVVSRESSPmKPGAGGGGGNR NKGGGDGDDAGK
gi299473526	CBN77922.1	5.6	2	2	518	57.1	9.32	Glycosyltransferase, family GT64	function unknown protein	0	0.4995	yes	1																								MLLRPRHVSAPVPIIEEDGNKK KALLPPMATIAEDGLGVLPmPPTEKDR
gi299473088	CBN77481.1	5.54	2	2	478	47.6	4.96	hypothetical protein Esi_0059_0120	hypothetical protein Esi_0059_0120	3.15313e-130	1																										LGLNDAPGSAAAASAAGLR THRTLSDQEWSSSRR
gi299472206	CBN77176.1	6.51	5	2	446	48.2	6.46	hypothetical protein Esi_0038_0032	hypothetical protein Esi_0038_0032	0	0.773333																										LDDAAAGAAEEQQRPR LDDAAAGAAEEQQRPR LDDAAAGAAEEQQRPR LDDAAAGAAEEQQRPR NDSFVDK
gi299116487	CBN76203.1	5.21	2	2	768	78.6	4.89	hypothetical protein (Partial)	hypothetical protein (Partial)	1.44974e-56	1																										LMRQSPSGDIVQQLDQKDAQIAMLK SSSASAGGSSLSSPR
gi298714067	CBJ33832.1	4.78	2	2	366	38	8.48	conserved unknown protein	lao ao transport system atpase	5.40671e-160	0.821																										AITLVESHR RDcSSGRLVAATGGFPK
gi298713806	CBJ27178.1	4.3	2	2	652	70.7	10.08	conserved unknown protein	conserved unknown protein	0	0.775																										SVQSAADISSKTLQRPK EATTTPcK TTGLATTGESTLPR
gi298711693	CBJ32744.1	5.93	17	2	312	31.7	5.82	conserved unknown protein	septum site-determining protein	1.10641e-177	0.6855																										LVFHSFDLSAANP LVFHSFDLSAANP LVFHSFDLSAANP LVFHSFDLSAANP LVFHSFDLSAANP LVFHSFDLSAANP LVFHSFDLSAANP LVFHSFDLSAANP LVFHSFDLSAANP LVFHSFDLSAANP LVFHSFDLSAANP LVFHSFDLSAANP LVFHSFDLSAANP LVFHSFDLSAANP ASLAGcSRAVR LVFHSFDLSAANP LVFHSFDLSAANP LVFHSFDLSAANP LVFHSFDLSAANP
gi298708713	CBJ49210.1	6.88	2	2	320	33.9	7.5	expressed unknown protein	expressed unknown protein	0	0.71																										LLAVFLEEGK MGVSRIGPGGGGDGEGGVSPQGLK
gi299117148	CBN75112.1	40.38	2	2	52	5.9	9.38	expressed unknown protein	axonemal dynein light chain p33	5.86561e-30	0.8																										TTLEQMLSAPK SQHGDGTSRR
gi299469757	CBN76611.1	6.32	2	2	364	41.2	7.01	GPA4, alpha subunit of a heterotrimeric G protein	g-protein subunit alpha 8	0	0.6305																										ILLLGAGESGK KNSIEcMQGVLR
gi299471059	CBN78919.1	9.27	2	2	205	21.4	6.04	Peroxyredoxin	tsa family protein	6.91078e-146	0.661																										LAMIVNDGTIEK EGDKFPMDSTFQIK
gi298710532	CBJ25596.1	7.39	3	2	548	59.6	6.25	malate dehydrogenase	nadp-dependent malic enzyme	0	0.7115																										SILDNWPVEDIR FLFLGAGEAGAGIAELIAYAIQVETGK FLFLGAGEAGAGIAELIAYAIQVETGK
gi298714464	CBJ27486.1	2.77	2	2	541	59.1	5.95	conserved unknown protein	ef hand family protein	0	0.477																										VcESVNMR MDTcMQK
gi299115531	CBN75735.1	11.4	2	2	272	30.7	9.23	conserved unknown protein	conserved unknown protein	0	0.616667																										ILYESDAMSR THFTLGNHKFDWQTDAMRTQR
gi298710868	CBJ26377.1	7.12	2	2	344	39.5	7.42	conserved unknown protein	conserved unknown protein	0	0.5975																										SVQAFNRMVQVSALcALTK EVLDEIAAEKR
gi299116589	CBN74777.1	3.17	16	2	838	89.5	8.98	hypothetical protein Esi_0041_0144	hypothetical protein Esi_0041_0144	0	1																										EVVGTDAARGSGGGGK EVVGTDAARGSGGGGK GDSAKHAASQALAATSRSIEK EVVGTDAARGSGGGGK EVVGTDAARGSGGGGK EVVGTDAARGSGGGGK EVVGTDAARGSGGGGK EVVGTDAARGSGGGGK EVVGTDAARGSGGGGK EVVGTDAARGSGGGGK EVVGTDAARGSGGGGK EVVGTDAARGSGGGGK EVVGTDAARGSGGGGK EVVGTDAAR EVVGTDAARGSGGGGK EVVGTDAARGSGGGGK EVVGTDAARGSGGGGK
gi298712990	CBJ26892.1	3.34	2	2	763	79.9	9.88	conserved unknown protein	oligosaccharide translocation protein rft1	0	0.528	yes	8																								EAYRRR LSPSGSPHRSPSEPSR
gi298706049	CBJ29159.1	3.61	2	2	762	85.4	5.08	conserved unknown protein	function unknown protein	0	0.481																										WLGQDEK TRGFPLGAQVR
gi298713440	CBJ33641.1	7.53	2	2	239	27.4	5.26	conserved unknown protein	heparan sulfate glucosamine 3-o-sulfotransferase 3a1	1.20711e-178	0.481																										GENATTEDLR VTVESSPR
gi298709494	CBJ48509.1	4.07	2	2	320	35.3	5.3	Hypothetical leucine rich repeat protein	hypothetical leucine rich repeat protein	0	1																										QYEWRTGR EEREQEQQVR
gi298707389	CBJ30024.1	5.17	4	2	290	32.1	4.87	hypothetical protein Esi_0171_0039	hypothetical protein Esi_0171_0039	1.23694e-175	1																										cTDDSTPNR cTDDSTPNR cTDDSTPNR APTPTELMEVYRcTDDSTPNR
gi298707445	CBJ30068.1	4.26	2	2	446	47	4.23	FirrV-1-B30 precursor	n/a	1.65522e-101	0.6995																										FERSRR YNHIEDTDGAGVR
gi299115874	CBN74437.1	5.83	3	2	309	34.7	9.11	similar to TAK1 (TGF-beta-activated kinase)	tak1 (tgf-beta-activated kinase)	0	0.5815																										DFVEILGDmWQRDPK DFVEILGDmWQRDPK LWQRNR
gi299472524	CBN77309.1	2.93	8	2	648	69.4	8.31	conserved unknown protein	probable exonuclease mut-7 homolog	0	0.6225																										VLMRQEK TcEAWLGKPLDK TcEAWLGKPLDK TcEAWLGKPLDK TcEAWLGKPLDK TcEAWLGKPLDK TcEAWLGKPLDK TcEAWLGKPLDK
gi299472096	CBN79681.1	9.49	2	2	295	31.1	4.83	Dihydrolipoamide acetyltransferase	dihydrolipoamide s-acetyltransferase (e2 component of pyruvate dehydrogenase complex)	0	0.684																										mPQAcALAIGAAEER LLKVRETLNEGLPEDEHLSLSDmLLK
gi299471792	CBN79461.1	2.76	6	2	1829	182.5	5.83	conserved unknown protein	integral membrane protein involved in cell shape determination	0	0.574																										RISASEDASPSNGGTPPPDSNNTAGSSGGGGGGGGGR RISASEDASPSNGGTPPPDSNNTAGSSGGGGGGGGGR RISASEDASPSNGGTPPPDSNNTAGSSGGGGGGGGGR RISASEDASPSNGGTPPPDSNNTAGSSGGGGGGGGGR RISASEDASPSNGGTPPPDSNNTAGSSGGGGGGGGGR ARFYTAEDGAEK
gi299470952	CBN79936.1	15.7	2	2	172	18.9	8.7	hypothetical protein Esi_0015_0124	hypothetical protein Esi_0015_0124	2.71656e-105	1																										FVAScSNGNQNSGGSGLSRSRLPGFPDTHIAV LLSQKcGSKMK
gi299470084	CBN79261.1	9.84	3	2	381	42.3	7.09	Myosin light chain kinase (MLCK)	myosin light chain kinase	0	0.57																										NDEELFLmEAGILTGLTHAHVVEmRGFYK NDEELFLmEAGILTGLTHAHVVEmRGFYK RFGENKPLLEEFQGLQR NDEELFLMEAGILTGLTHAHVVEMRGFYK
gi299469642	CBN76496.1	6.78	2	2	428	47.1	8.53	conserved unknown protein	conserved unknown protein	0	0.745																										QERGGPAGPPAARVEVGR LDRSYGIGLLR
gi299117384	CBN75340.1	4.09	9	2	636	65.2	10.26	hypothetical protein Esi_0078_0083	hypothetical protein Esi_0078_0083	0	1																										GSRVSGSSPSLSAPAARSNGK GSRVSGSSPSLSAPAARSNGK GSRVSGSSPSLSAPAARSNGK GSRVSGSSPSLSAPAARSNGK GSRVSGSSPSLSAPAARSNGK GSRVSGSSPSLSAPAARSNGK GSRVSGSSPSLSAPAARSNGK GSRVSGSSPSLSAPAARSNGK GSRVSGSSPSLSAPAARSNGK SPKYWTcPVR
gi299116851	CBN74963.1	19.38	2	2	227	24.1	5.07	conserved unknown protein	soul heme-binding-like protein	1.1585e-162	0.542																										ERIVAVEKVASEGGAFSEYVSADSK VSLREVPEAVYLVHQFSGNMGR FLVARYDPPWTLPFLR
gi299115134	CBN75501.1	3.92	3	2	765	81.4	4.77	conserved unknown protein	function unknown protein	0	0.5945																										FSWHVDADPAAFPPSPWR FSWHVDADPAAFPPSPWR YSLVLKLIFFSK
gi298714990	CBJ27711.1	4.05	3	2	556	59.4	8.75	hypothetical protein Esi_0083_0040	hypothetical protein Esi_0083_0040	0	1																										ISRAcGAQQTTLGLVR ISRAcGAQQTTLGLVR MKAGPADLQIPGR
gi298713278	CBJ26974.1	3.39	7	2	902	98.1	4.53	conserved unknown protein	cs-domain containing conserved in apicomplexa	0	0.612																										DAmIAANQAAVNTVQQLAK DAmIAANQAAVNTVQQLAK DAmIAANQAAVNTVQQLAK DAmIAANQAAVNTVQQLAK DAmIAANQAAVNTVQQLAK DAmIAANQAAVNTVQQLAK ATASGLWNK LDAQVFELFKTmEK
gi298712075	CBJ26655.1	2.23	10	2	1435	153.6	4.91	conserved unknown protein	fanconi anemia group d2 protein	0	0.515																										KVFRILcAmASSAPGGR KVFRILcAMASSAPGGR KVFRILcAMASSAPGGR KVFRILcAMASSAPGGR KVFRILcAMASSAPGGR KVFRILcAmASSAPGGR KVFRILcAMASSAPGGR KVFRILcAMASSAPGGR KVFRILcAMASSAPGGR KVFRILcAMASSAPGGR KVFRILcAMASSAPGGR KTEGEQSEVMRDTLR
gi298711926	CBJ48613.1	3.39	2	2	975	107.1	5.49	NB-ARC and TPR repeat-containing protein-likely pseudogene	nb-arc and tpr repeat-containing protein	0	0.558																										MVADSGDATAATARLALK cLAIQEAMGPGDDVAYTLYHLGMcVRQAGR
gi298710555	CBJ25619.1	5.1	3	2	578	62.4	6.81	PObg1, plastid Obg/CgtA-like GTPase 1	function unknown protein	0	0.6615																										FmSISAVAGENTQELMRR VMEAmGVDAALK VmEAMGVDAALK FRSTATATLHR
gi298709762	CBJ31564.1	5.02	2	2	887	91.3	5.52	hypothetical protein Esi_0265_0018	hypothetical protein Esi_0265_0018	0	0.78																										QATAAEImESIASLLSARPmTAVRAAmQAR MTVAVAEATSEAEAAAGAMK
gi298708559	CBJ30644.1	21.11	19	2	180	18.1	10.1	conserved unknown protein	u1 small nuclear ribonucleoprotein	1.87258e-45	0.7735																										GPmMGSGSLGMGPmNNSLMPGMGGR GPMmGSGSLGMGPmNNSLMPGMGGR GPmMGSGSLGmGPMNNSLMPGMGGR GPMmGSGSLGmGPMNNSLMPGMGGR GPmMGSGSLGMGPMNNSLMPGmGGR GPmMGSGSLGMGPMNNSLmPGMGGR GPMmGSGSLGMGPMNNSLMPGmGGR GPMMGSGSLGmGPmNNSLMPGMGGR GPMmGSGSLGMGPMNNSLmPGMGGR QHNRGWKHTDNVK GPMmGSGSLGMGPmNNSLMPGMGGR GPmMGSGSLGMGPmNNSLMPGMGGR GPMMGSGSLGmGPmNNSLMPGMGGR GPmmGSGSLGMGPMNNSLMPGMGGR GPMmGSGSLGmGPMNNSLMPGMGGR GPmMGSGSLGmGPMNNSLMPG…
gi298708534	CBJ49167.1	3.65	2	2	453	49.2	5.53	glutaredoxin	monothiol glutaredoxin-s17	0	0.6485																										FSRKmAEmLR NSLANAAGVKPSK
gi298707399	CBJ30034.1	7.4	24	2	338	37.3	9.55	conserved unknown protein	sulfate permease family	0	0.772	yes	3																								mASFAAMIFR mASFAAMIFR mASFAAMIFR mASFAAMIFR mASFAAMIFR mASFAAMIFR mASFAAMIFR MASFAAmIFR mASFAAMIFR mASFAAMIFR mASFAAMIFR MASFAAmIFR mASFAAMIFR mASFAAMIFR MASFAAmIFR MASFAAmIFR MASFAAmIFR mASFAAMIFR MASFAAmIFR mASFAAMIFR mASFAAMIFR mASFAAMIFR mASFAAmIFR mASFAAMIFR mASFAAMIFR mASFAAMIFR MASFAAmIFR
gi298706076	CBJ29186.1	6.44	2	2	427	45.9	10.48	conserved unknown protein	conserved unknown protein	0	0.67																										VVmSLLR mNSSLSQGVLPRRAK
gi298705037	CBJ28512.1	2.58	2	2	447	52.4	8.37	conserved unknown protein	protein phosphatase 2a regulatory b	0	0.772																										RMPARSGR EALFVQK
gi298713575	CBJ27103.1	17.9	2	2	257	27.5	5.5	ascorbate peroxidase	ascorbate peroxidase	9.95561e-172	0.701																										MGFGDEGIVALSGAHTLGR cLFVDEGFLPLAQKYKASQEAFFEDYK
gi298710679	CBJ32104.1	32.18	2	2	87	10	6.55	conserved unknown protein	dynein light chain roadblock-type 1	1.64515e-55	0.712																										VQPGVEGYVIcDMEGQVLR GVVRDVNPK
gi299471746	CBN76967.1	10.15	2	2	266	29.6	6.23	radial spoke protein 12	peptidyl-prolyl cis-trans isomerase-like 6-like	0	0.6265																										HLVLQDGGR VVFQLYSQDcPTTcENFR
gi298707111	CBJ29903.1	8.57	2	2	315	34.5	5.41	GDP-mannose 6-dehydrogenase	udp-glucose 6-dehydrogenase	0	0.5095																										YVWSTIPLVVK DVPELTSLAPEGSVFR
gi299470789	CBN79835.1	9.68	2	2	248	26.3	6.23	conserved unknown protein	ankrd44 protein	4.57905e-180	0.5795																										LASFGVIDLLK SGHEEVATYLLDK
gi298714473	CBJ27495.1	23.36	2	2	107	12	4.59	flagellar inner arm dynein light chain Tctex1	flagellar inner arm dynein light chain tctex1	6.52788e-74	0.6055																										NAITGcLTDVMYNPK YIITcIIMQK
gi299473153	CBN78729.1	20.15	2	2	263	27.7	5.54	expressed unknown protein	expressed unknown protein	1.32682e-180	1	yes	2																								VDGEGSAGAVDEQKPAGLQQIQGVVDNLSQLRR QELEQSNSGPGGGSPARDPK
gi298707709	CBJ26026.1	14.29	5	2	238	24.8	7.46	short-chain alcohol dehydrogenase-like protein	short-chain dehydrogenase reductase sdr	2.71501e-159	0.6425																										TRmTGDSGLVDTHESVAGMTDR TRmTGDSGLVDTHESVAGMTDR TRMTGDSGLVDTHESVAGmTDR ESmEVNAYGALR TRMTGDSGLVDTHESVAGmTDR
gi298710587	CBJ32017.1	32.84	2	2	609	68.2	7.59	similar to ubiquitin	polyubiquitin c	0	0.9715																										TITLDVEPSDTIDGVK ESTLHLVLR
gi298705129	CBJ28572.1	5.38	2	2	688	72.9	6.3	conserved unknown protein	abc transporter b family protein	0	0.671	yes	6																								AIIKDPAILLLDEATSALDSESEK GAAVEVFEVLDRVPPIDSSSEK METQMVNAGPK
gi298705884	CBJ34187.1	22.9	2	2	131	14.1	6.13	hypothetical protein Esi_1304_0001	hypothetical protein Esi_1304_0001	3.07315e-90	1																										TTFDEWDTLLFPNPPSR ESYFQEFcSVTEK TTFDEWDTLLFPNPPSR IILADEISNR
gi298713825	CBJ27197.1	7.91	2	2	455	47.2	9.44	expressed unknown protein	expressed unknown protein	0	1																										TTAPMKAAAAAAAATVDAEAQSK KASPPEGEPSAAR
gi298713306	CBJ27002.1	10.69	2	2	318	35	5.43	UDP-glucose 6-dehydrogenase	udp-glucose 6-dehydrogenase	0	100																										APWQVVFGYMPGEEDVK ISFANcIYGLANELDPTIDAQK LTVLNIAEAEFMK MTNAFLEFVGR DVPELTSLAPEGSVFR GFDVVPAIIEK MNEAGIPccHPDNcPDDLNAEIVLLSVPTPLIK DVPELTSLAPEGSVFR
gi298707810	CBJ34262.1	7.66	2	2	457	51.1	5.26	conserved unknown protein	dynein heavy chain	0	100																										DDLQLFHTTYNWPHNVK KADALHTLIMEEVASDNR AEAEADSILEQETLLGMPLTDNLTPLSDLR EAVPDLNNYPMFSVK IAEAGSLVPGDVHNcVR TLGPcTMVLSDEIVVDAKSR SRVRAAIATHMAAPLR QDLEMVVEGQQEQLLR KADALHTLImEEVASDNR
gi298713802	CBJ27174.1	10.32	2	2	339	38.5	5.74	phosphatase PP1	serine threonine-protein phosphatase pp1	0	100																										TFTDcFNcLPVAAIVDEK DIFMQQPILLELEAPIK
gi298706282	CBJ29307.1	4.11	2	2	608	66.5	5.06	Heat shock protein 70, likely pseudogene	heat shock protein 70	0	100																										GQIHEVVLVGGSTR FEDMNQDYFQK NAVITVPAYFNDSQR LSADEIERmVEEAERYK FSLDGIPPMPR EEYEEKQK FSLDGIPPMPR MKEIAEAFTLARR
gi298710516	CBJ25580.1	2.69	2	2	1227	140.2	6.28	flagellar associated protein	wd repeat-containing protein 65	0	100																										LcAVTSDNQLFEVK FVALAEDGDKPTVSLYDLR FENQLTAER
gi299470636	CBN78577.1	5.41	2	2	536	55.2	5.55	udp-n-acetylglucosamine pyrophosphorylase	udp-n-acetylglucosamine pyrophosphorylase	0	100																										IPWYIMTSPLNDAATR LESFIFDVFPLSK IPWYImTSPLNDAATR ATFAAHGQDHVFKYVDSGAVK
gi299117604	CBN75446.1	13.89	2	2	288	30.5	9.8	conserved unknown protein	conserved unknown protein	0	100																										IGFGTAGRPPLQDGGAEAPGPGAYQLK LAIVNPQEENAPK TcQLEPGPGHYK
gi298712183	CBJ33055.1	1.41	32	2	1512	161.6	7.97	conserved unknown protein	nucleoporin 155	0	0.501																										SFAMLPEALSRERDR SFAMLPEALSRERDR SFAMLPEALSRERDR SFAMLPEALSRERDR SFAMLPEALSRERDR SFAMLPEALSRERDR SFAMLPEALSRERDR SFAMLPEALSRERDR SFAMLPEALSRERDR SFAMLPEALSRERDR SFAMLPEALSRERDR SFAMLPEALSRERDR SFAMLPEALSRERDR SFAMLPEALSRERDR SFAMLPEALSRERDR SFAMLPEALSRERDR SFAMLPEALSRERDR SFAMLPEALSRERDR SFAMLPEALSRERDR SFAMLPEALSRERDR SFAMLPEALSRERDR SFAMLPEALSRERDR SFAMLPEALSRERDR SFAMLPEALSRERDR SFAMLPEALSRERDR…
gi299117424	CBN73927.1	4.7	1	2	383	43.2	5.91	GPA5, alpha subunit of a heterotrimeric G protein	g-protein subunit alpha 8	0	0.622																										TPIFVFLNK ImDADAATNEVDKQLEELALADQRHVK
gi298714080	CBJ33842.1	9.11	2	2	234	26.1	9.55	conserved unknown protein	pogo transposable element with krab domain	4.07211e-171	0.53																										SKNGYPVGGTSFGVQEK SWcDLREcKLWIK
gi298706642	CBJ29580.1	4.06	1	2	378	41.4	5.77	galactose-4-epimerase, UDP	udp-glucose 4-epimerase	0	0.766																										YMIEEILR EQVmPRRAGDVEAMYADPSLAK
gi298709522	CBJ48537.1	5.82	1	2	579	60.8	4.75	conserved unknown protein (Partial)	function unknown protein	0	0.492																										KDFAIINYSAAEAAKTcIESMHGTDFMGK DHAARALERLPEIK
gi299470344	CBN78393.1	3.39	1	2	570	63.1	7.15	flagellar outer dynein arm-docking complex	flagellar outer dynein arm-docking complex protein 1	0	0.625																										LQDQADIYAK FDDTSINR
gi298710220	CBJ26295.1	7.49	1	2	365	39.8	4.45	conserved unknown protein	function unknown protein	0	0.555																										VEMDDDGNLIIARPKISGK TLTQQTGSGmAQLcMWQLVVGFNLR
gi298711620	CBJ32677.1	2.8	2	2	834	90	5.34	BiP	78 kda glucose-regulated protein precursor	0	0.8155																										GMYAHEGVLARAEWVRK GMYAHEGVLARAEWVRK GMYAHEGVLARAEWVRK
gi298711611	CBJ32668.1	3.59	1	2	446	48	10.01	expressed unknown protein	expressed unknown protein	1.76404e-141	1																										EGGGEGEGTRR GGGSGGGGSSGGRVR
gi298707022	CBJ29830.1	18.07	2	2	107	12.1	6.54	conserved unknown protein	soluble nsf attachment protein receptor	8.0328e-72	0.584	yes	1																								LFGQRETLESAQQR LFGQRETLESAQQR LFGQRETLESAQQR
gi319738242	CBJ18018.1	4.91	1	2	530	58.1	8.51	cytochrome oxidase subunit I	cytochrome c oxidase subunit 1	0	0.9405	yes	12																								GSVEEANPWVKGRGLAFPALTQVSAK GLAFPALTQVSAK
gi299473303	CBN77702.1	2.76	2	2	495	53.1	8.32	conserved unknown protein	pi-plc x domain-containing protein 3-like	0	0.4525																										VLDLRcGYVGR VLDLRcGYVGR VADTGWQK
gi299116844	CBN74956.1	10.72	4	2	286	31.8	5.17	cytochrome P450	cytochrome p450	0	0.526																										KGELLMmEQALGQmDPSVFGPDAR KGELLmMEQALGQmDPSVFGPDAR VDGQWGcAAHAIGmLDGILK KGELLmmEQALGQMDPSVFGPDAR KGELLMmEQALGQmDPSVFGPDAR KGELLmMEQALGQmDPSVFGPDAR
gi299115444	CBN75609.1	13.77	8	2	213	23.9	5.41	conserved unknown protein	nudix (nucleoside diphosphate linked moiety x)-type motif 1	1.64079e-97	0.6915																										HVLEAVTPQEmmQVVLREHGmDAK HVLEAVTPQEmmQVVLREHGmDAK HVLEAVTPQEmmQVVLREHGmDAK HVLEAVTPQEmmQVVLREHGmDAK HVLEAVTPQEmmQVVLREHGmDAK HVLEAVTPQEmmQVVLREHGmDAK HVLEAVTPQEmmQVVLREHGmDAK HVLEAVTPQEmmQVVLREHGmDAK HVLEAVTPQEmmQVVLREHGmDAK HVLEAVTPQEmmQVVLREHGmDAK
gi298712972	CBJ26874.1	3.87	1	2	396	41.8	9.98	ATP synthase: assembly factor for F1 component	atp10 protein	0	0.4655																										mmKPLLVSTMGR GTSSLNGTAR
gi298712448	CBJ33223.1	3.21	9	2	1081	112.1	4.61	protein phosphatase 2C	protein phosphatase 2c	0	0.647																										DGAGASSMSELEDFVGDLNRSSEGVLEGGTQK DGAGASSmSELEDFVGDLNRSSEGVLEGGTQK DGAGASSMSELEDFVGDLNRSSEGVLEGGTQK DGAGASSMSELEDFVGDLNRSSEGVLEGGTQK DGAGASSMSELEDFVGDLNRSSEGVLEGGTQK DGAGASSMSELEDFVGDLNRSSEGVLEGGTQK DGAGASSMSELEDFVGDLNRSSEGVLEGGTQK DGAGASSMSELEDFVGDLNRSSEGVLEGGTQK DGAGASSmSELEDFVGDLNRSSEGVLEGGTQK DGAGASSMSELEDFVGDLNRSSEGVLEGGTQK DGAGASSMSELEDFVGDLNRSSEGVLEGGTQK DGAGASSMSELEDFVGDLNRSSEGVLEGGTQK DGA…
gi298710612	CBJ32040.1	12.27	4	2	250	27.4	7.46	conserved unknown protein	conserved unknown protein	7.2329e-169	0.563																										QQTESAYQMALKIELEDRGVAVQQEVK QQTESAYQMALKIELEDRGVAVQQEVK QQTESAYQMALKIELEDRGVAVQQEVK RVIALQVVDDR
gi298709235	CBJ31175.1	8.63	1	2	274	28.1	7.3	conserved unknown protein	gnat family	3.73276e-159	0.684																										mDmEAFRAYFLSHAAFVVR QRGVARLmGHAFLR
gi298708866	CBJ30824.1	4.06	1	2	632	65	8.62	hypothetical protein Esi_0216_0050	hypothetical protein Esi_0216_0050	0	1																										GSQRSLSLTmGPGATIGDVKQR FIPSVGRPKLK
gi298708182	CBJ30522.1	10.58	2	2	145	16.1	6.02	conserved unknown protein	hypothetical leucine rich repeat calcium binding protein	2.72322e-101	0.549444																										SSSDESATSRLEK SSSDESATSRLEK QLSDQGR
gi298705516	CBJ28783.1	0.76	2	2	2243	237.9	6.89	conserved unknown protein	coiled-coil domain-containing protein 108	0	100																										MATTIQAQAR IWGSLAR
